# Supplementary material for: Patient satisfaction with in-centre haemodialysis care: an international survey
Source: PubMed Central journal article supplement — BMJ Open. 2014 May 17;4(5):e005020. doi: 10.1136/bmjopen-2014-005020 (PMC4039823; doi:10.1136/bmjopen-2014-005020), 2014-05-17
Supplement: bmjopen-2014-005020.draft_revisions.pdf [file bmjopen-2014-005020.draft_revisions.pdf]

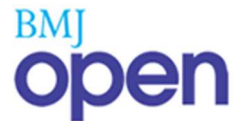

**Patient satisfaction with haemodialysis care: An international survey**

|                                 |                                                                                                                                                                                                                                                                                                                                                                                                                                                                                                                                                                                                                                                                                                                                                                                                                                                                                                                                                                                                                                                                                                                                                                                                                                                                                                                                                                                                                                                             |
|---------------------------------|-------------------------------------------------------------------------------------------------------------------------------------------------------------------------------------------------------------------------------------------------------------------------------------------------------------------------------------------------------------------------------------------------------------------------------------------------------------------------------------------------------------------------------------------------------------------------------------------------------------------------------------------------------------------------------------------------------------------------------------------------------------------------------------------------------------------------------------------------------------------------------------------------------------------------------------------------------------------------------------------------------------------------------------------------------------------------------------------------------------------------------------------------------------------------------------------------------------------------------------------------------------------------------------------------------------------------------------------------------------------------------------------------------------------------------------------------------------|
| Journal:                        | <i>BMJ Open</i>                                                                                                                                                                                                                                                                                                                                                                                                                                                                                                                                                                                                                                                                                                                                                                                                                                                                                                                                                                                                                                                                                                                                                                                                                                                                                                                                                                                                                                             |
| Manuscript ID:                  | bmjopen-2014-005020                                                                                                                                                                                                                                                                                                                                                                                                                                                                                                                                                                                                                                                                                                                                                                                                                                                                                                                                                                                                                                                                                                                                                                                                                                                                                                                                                                                                                                         |
| Article Type:                   | Research                                                                                                                                                                                                                                                                                                                                                                                                                                                                                                                                                                                                                                                                                                                                                                                                                                                                                                                                                                                                                                                                                                                                                                                                                                                                                                                                                                                                                                                    |
| Date Submitted by the Author:   | 07-Feb-2014                                                                                                                                                                                                                                                                                                                                                                                                                                                                                                                                                                                                                                                                                                                                                                                                                                                                                                                                                                                                                                                                                                                                                                                                                                                                                                                                                                                                                                                 |
| Complete List of Authors:       | Palmer, Suetonia; University of Otago, Department of Medicine<br>De Berardis, Giorgia ; Consorzio Mario Negri Sud, Clinical Pharmacology and Epidemiology<br>Craig, Jonathan; University of Sydney, Sydney School of Public Health<br>Tong, Allison; The University of Sydney, Sydney School of Public Health<br>Tonelli, Marcello; University of Alberta,<br>Pellegrini, Fabio; Consorzio Mario Negri Sud, Clinical Pharmacology and Epidemiology<br>Ruospo, Marinella; Diaverum Renal Services Group,, Medical Scientific Office<br>Hegbrant, Jorgen; Diaverum Renal Services Group,, Medical Scientific Office<br>Wollheim, Charlotta; Diaverum Renal Services Group,, Medical Scientific Office<br>Celia, Eduardo; Diaverum Renal Services Group,, Medical Scientific Office<br>Gelfman, Ruben; Diaverum Renal Services Group,, Medical Scientific Office<br>Ferrari, Juan Nin; Diaverum Renal Services Group,, Medical Scientific Office<br>Torok, Marietta; Diaverum Renal Services Group,, Medical Scientific Office<br>Murgo, Marco; Diaverum Renal Services Group,, Medical Scientific Office<br>Leal, Miguel; Diaverum Renal Services Group,, Medical Scientific Office<br>Bednarek-Skublewska, Anna; Diaverum Renal Services Group,, Medical Scientific Office<br>Dulawa, Jan; Diaverum Renal Services Group,, Medical Scientific Office<br>Strippoli, Giovanni; Consorzio Mario Negri Sud, Department of Clinical Pharmacology and Epidemiology |
| <b>Primary Subject Heading</b>: | Patient-centred medicine                                                                                                                                                                                                                                                                                                                                                                                                                                                                                                                                                                                                                                                                                                                                                                                                                                                                                                                                                                                                                                                                                                                                                                                                                                                                                                                                                                                                                                    |
| Secondary Subject Heading:      | Renal medicine                                                                                                                                                                                                                                                                                                                                                                                                                                                                                                                                                                                                                                                                                                                                                                                                                                                                                                                                                                                                                                                                                                                                                                                                                                                                                                                                                                                                                                              |
| Keywords:                       | Dialysis < NEPHROLOGY, Quality in health care < HEALTH SERVICES ADMINISTRATION & MANAGEMENT, Chronic renal failure < NEPHROLOGY                                                                                                                                                                                                                                                                                                                                                                                                                                                                                                                                                                                                                                                                                                                                                                                                                                                                                                                                                                                                                                                                                                                                                                                                                                                                                                                             |
|                                 |                                                                                                                                                                                                                                                                                                                                                                                                                                                                                                                                                                                                                                                                                                                                                                                                                                                                                                                                                                                                                                                                                                                                                                                                                                                                                                                                                                                                                                                             |

# Patient satisfaction with haemodialysis care: An international survey

Suetonia C. Palmer, MBChB PhD,<sup>1</sup> Giorgia de Berardis, PhD,<sup>2</sup> Jonathan C. Craig, MBChB DCH MM PhD,<sup>3</sup> Allison Tong, PhD,<sup>3</sup> Marcello Tonelli, MD PhD,<sup>4</sup> Fabio Pellegrini, MSc<sup>2,5</sup> Marinella Ruospo, MSc<sup>6</sup> Jörgen Hegbrant, MD PhD,<sup>6</sup> Charlotta Wollheim, MSc,<sup>6</sup> Eduardo Celia, MD,<sup>6</sup> Ruben Gelfman, MD,<sup>6</sup> Juan Nin Ferrari, MD,<sup>6</sup> Marietta Török, MD,<sup>6</sup> Marco Murgo, MD,<sup>6</sup> Miguel Leal, MD,<sup>6</sup> Anna Bednarek-Skublewska, MD,<sup>6</sup> Jan Dulawa, MD,<sup>6</sup> and Giovanni F.M. Strippoli, MD MM MPH PhD<sup>2,3,6,7</sup>

<sup>1</sup>Department of Medicine, University of Otago Christchurch, Christchurch, New Zealand

<sup>2</sup>Consorzio Mario Negri Sud, S. Maria Imbaro, Italy

<sup>3</sup>School of Public Health, University of Sydney, Sydney, Australia

<sup>4</sup>Division of Nephrology and Immunology, University of Alberta, Edmonton, Canada

<sup>5</sup>Scientific Institute Casa Sollievo della Sofferenza, Italy

<sup>6</sup>Diaverum Scientific Medical Office, Lund, Sweden

<sup>7</sup>Department of Emergency and Organ Transplantation, University of Bari, Italy

## Corresponding author and address for reprints:

Giovanni FM Strippoli,  
Department of Clinical Pharmacology and Epidemiology,  
Consorzio Mario Negri Sud,  
Via Nazionale 8/a, 66030,  
S Maria Imbaro,  
Italy ([gfmstrippoli@gmail.com](mailto:gfmstrippoli@gmail.com))  
Phone: +39 3358756828  
Facsimile: +39 0805096087

**Word count (for abstract):** 250

**Word count (for text):** 3454

**Running title** Patient satisfaction with haemodialysis

**Key words** Patient satisfaction, chronic dialysis, chronic kidney failure

**Abstract****Objectives**

To evaluate patient experiences of specific aspects of haemodialysis care across several countries

**Design**

Cross-sectional survey using the Choices for Healthy Outcomes in Caring for End-Stage Renal Disease (CHOICE) questionnaire

**Setting**

Haemodialysis clinics within a single provider in Europe and South America

**Participants**

2748 adults treated in haemodialysis

**Primary and secondary outcomes**

The primary outcome was patient satisfaction with overall care. Secondary outcomes included patient experiences of individual aspects of dialysis care

**Results**

2145 (78.1%) adults responded to the questionnaire. Fewer than half (46.5% [95% confidence interval, 44.5 to 48.6]) rated their overall care as excellent. Global perceptions of care were uninfluenced by most respondent characteristics except age and depressive symptoms; older respondents were less critical of their care (adjusted odds ratio for excellent rating 1.44 [1.01-2.04]) and those with depressive symptoms were less satisfied (0.56 [0.44 to 0.71]). Aspects of care that respondents most frequently ranked as excellent were staff attention to dialysis vascular access (54 [52-56]%), caring of nurses (53 [51-55]%), staff responsiveness to pain or discomfort (51 [49-53]%), caring, helpfulness and sensitivity of dialysis staff (50 [48-52]%), and ease of reaching dialysis staff by telephone (48 [46-50]%). The aspects of care least frequently ranked as excellent were information provided when choosing a dialysis modality (23 [21-25]%), ease of seeing a social worker (28 [24-

1  
2  
3 32]), information provided about dialysis (34 [32-36]%), accuracy of information from nephrologist  
4  
5 (for example, about prognosis or likelihood of a kidney transplant) (37 [35-39]%), and accuracy of  
6  
7 nephrologists' instructions (39 [36-41]%).  
8  
9

## 10 **Conclusion**

11  
12 Haemodialysis patients are least satisfied with the complex aspects of care. Patients' expectations  
13  
14 for accurate information, prognosis, the likelihood of kidney transplantation and their options when  
15  
16 choosing dialysis treatment need to be considered when planning healthcare research and  
17  
18 healthcare practices.  
19  
20

## 21 **Article summary**

### 22 **Strengths and limitations of this study**

- 23  
24  
25  
26 • The study is based on a large multinational survey of patients with chronic kidney failure  
27  
28 needing treatment with long-term dialysis. There were no specific exclusions other than  
29  
30 refusal or inability to complete the survey questions  
31  
32  
33 • This study adds knowledge across a large cohort of the specific aspects of dialysis care that  
34  
35 fewer patients find satisfactory  
36  
37  
38 • The limitations were the lack of data about the health service characteristics that might have  
39  
40 contributed to patient experiences as well as linkages to patient relevant outcomes  
41  
42  
43  
44  
45  
46  
47  
48  
49  
50  
51  
52  
53  
54  
55  
56  
57  
58  
59  
60

## Introduction

Patients treated with haemodialysis experience mortality rates approaching 15-20% each year<sup>[1]</sup> and have profoundly impaired quality of life,<sup>[2 3]</sup> contributed to by severe symptoms of fatigue, low appetite, pain, sleep disorders, anxiety, nausea, and restless legs.<sup>[4]</sup> While interventions in haemodialysis trials and healthcare regulations have largely focused on biomarker endpoints and quantitative outcomes (mortality and cardiovascular events) to evaluate care, dialysis patients value normalization of their lives, economic efficiency in healthcare, and how their personal preferences are met, including reducing dietary and travel restrictions.<sup>[5 6]</sup> This mismatch in patient, provider and research priorities has resulted in clinical research and practice that have not improved patient-centred outcomes for dialysis patients<sup>[7-11]</sup> and consumed considerable resources.<sup>[12]</sup>

Given that patients treated with in-centre haemodialysis attend dialysis care at least three times per week for several hours each time, their experiences of dialysis care are likely to have an important impact on living with chronic illness.<sup>[3 13]</sup> By contrast, health funders have traditionally used only clinical performance indicators such as anaemia, blood pressure, nutrition, dialysis vascular access and adequacy of solute removal to evaluate and allocate reimbursement for dialysis provision.<sup>[14-17]</sup> While improving patient satisfaction with dialysis treatment has the potential to increase quality of life and improve patient-level outcomes, data to inform this objective are scarce.<sup>[18 19]</sup> Studies indicate that healthcare delivery in the latter stages of chronic kidney disease such as predialysis nephrology care, multidisciplinary management, psycho-education interventions and prognosis communication may improve quantitative health outcomes in the dialysis setting, but there is little information on the effects of these strategies on outcomes relevant to patients, that include symptoms, function and quality of life.<sup>[20-24]</sup> In addition, evaluations of patient experiences of haemodialysis care are available and can shape our knowledge about what patients value, but in existing studies smaller population sizes within single countries limit the power to adjust for case-mix<sup>[19]</sup> and perceptions of care are limited to global scores which may restrict our understanding of

1  
2  
3 the contributions of specific, and potentially modifiable, aspects of care on overall patient  
4  
5 experience.<sup>[18]</sup>  
6  
7

8 Greater understanding of how patients experience all facets of long-term dialysis is needed to  
9  
10 inform the design of large-scale trials which evaluate targeted healthcare strategies to improve the  
11  
12 lives of dialysis patients in ways they value. Accordingly, we aimed, for the first time, to describe  
13  
14 patient satisfaction with haemodialysis care in a large multi-national cohort to assess patients'  
15  
16 experiences of haemodialysis care while accounting for clinical and demographic characteristics.  
17  
18

## 19 20 **Methods**

### 21 22 **Participants**

23  
24 We used data from Diaverum, a network which provides renal care including long-term in-centre  
25  
26 haemodialysis treatment for more than 20,000 patients in Europe and South America and surveys  
27  
28 patients at least annually about their satisfaction with care. We conducted a cross-sectional analysis  
29  
30 of routinely-gathered survey data collected in 2008. We selected a convenience sample of 15% of  
31  
32 patients in the network from clinics that were willing to contribute. Data were included for selected  
33  
34 patients who were aged 18 years or older and treated with haemodialysis between January and June  
35  
36 2008 in centres located in Europe (Hungary, Italy, Poland, and Portugal) and South America  
37  
38 (Argentina). All clinical centres were managed during the study period according to the same  
39  
40 standards of care. Of the 2748 patients selected (Argentina, n=670; Hungary, n=683; Italy, n=880;  
41  
42 Poland, n=477; Portugal, n=38), 2145 (78.1%) responded and 1846 (67.2%) provided complete  
43  
44 responses to all questions. We obtained ethics approval to analyse routinely-gathered clinical data  
45  
46 from the University of Sydney Human Research Ethics Committee (project number 2013/031). The  
47  
48 study was conducted according to the requirements of the Declaration of Helsinki.  
49  
50  
51

### 52 53 **Key measures**

54  
55 We collected data from patient responses to the Choices for Healthy Outcomes In Caring for End-  
56  
57 stage kidney disease (CHOICE) questionnaire, which evaluates satisfaction with dialysis treatment  
58  
59  
60

1  
2  
3 (see the **eAppendix** for the full survey).<sup>[25]</sup> The CHOICE questionnaire was originally developed by  
4  
5 Rubin and colleagues using a focus group of long-term in-centre haemodialysis and home-based  
6  
7 peritoneal dialysis patients to identify aspects of dialysis care most important to them. The items  
8  
9 identified were then ranked by a larger number of long-term dialysis patients to identify the top 25  
10  
11 items they considered extremely important. The questionnaire asks 20 questions about patients'  
12  
13 experiences relating to these different aspects of dialysis care on a 5-point Likert scale (poor, fair,  
14  
15 good, very good, excellent). In addition, three questions ask patients to rate the overall quality of  
16  
17 their care (poor, fair, good, very good, excellent, or not applicable), how much about their care could  
18  
19 be better (many things, a few things, one or two things, and nothing could be better at all), and  
20  
21 whether they would recommend their care service to others who may need dialysis care (definitely  
22  
23 not, probably not, not sure, probably yes, and definitely yes) (**eTable 1**). In addition, we summarized  
24  
25 measures of key performance indicators for dialysis within each country (**eTable 2**) for the two  
26  
27 quarters in which satisfaction data were collected and reported these as overall performance scores  
28  
29 for each participating country.  
30  
31  
32  
33

34 In the present analysis, the question "How easy is it to meet the social worker when you want to?"  
35  
36 was only included in the annual survey in Hungary and the two global questions about care "Thinking  
37  
38 about your dialysis care overall, how much could be better?" and "Would you recommend your  
39  
40 dialysis centre to a friend or relative who needs dialysis?" were omitted in the annual survey of  
41  
42 Italian patients.  
43  
44

45 Surveys were provided to patients by dialysis clinical staff during routine dialysis care. Patients self-  
46  
47 completed the questionnaires anonymously during a dialysis session and data were de-identified.  
48  
49 We then linked survey data to concurrent demographic, clinical, and laboratory information in a  
50  
51 clinical database using a unique patient identifier; additional data were provided where necessary by  
52  
53 the treating physician on a standardized case report form. We used questionnaires in the patients'  
54  
55  
56  
57  
58  
59  
60

1  
2  
3 native language after translation and linguistic validation by the MAPI Institute ([http://www.mapi-](http://www.mapi-institute.com)  
4  
5 [institute.com](http://www.mapi-institute.com)).  
6  
7

## 8 **Analysis**

9  
10 We considered a response to the survey as complete when interpretable answers were provided for  
11  
12 all survey questions and partially complete when one or more answers was missing. We used chi-  
13  
14 square tests and Mann-Whitney U tests to compare the characteristics of patients who responded to  
15  
16 the survey with those who did not. The primary outcome of interest was the proportion of  
17  
18 respondents who evaluated their overall care as 'excellent'. We also estimated the proportion of  
19  
20 respondents who evaluated each separate dimension of care as 'excellent'. To account for the  
21  
22 multilevel nature of the data (patients clustered within countries) and to control simultaneously for  
23  
24 the possible confounding effects of the different variables, we used multivariate multilevel logistic  
25  
26 regression models.<sup>[26 27]</sup> We constructed clustering and case-mix adjusted models that controlled  
27  
28 for the following potential confounding variables: age, gender, education level, occupational status,  
29  
30 marital status, distance to travel to the dialysis centre, kidney transplant waiting list status,  
31  
32 comorbid conditions (diabetes mellitus, hypertension, cardiovascular event), depression score, cause  
33  
34 of end-stage kidney disease, duration of dialysis per session, dialysis dose, adequacy of dialysis, and  
35  
36 serum values of haemoglobin and phosphorus. We performed multilevel logistic regression using the  
37  
38 SAS language macro routine Proc GLIMMIX (SAS Institute Inc., Cary, NC; Release 9.1, 2002-2003;  
39  
40 <http://www.sas.com>).  
41  
42  
43  
44  
45  
46  
47  
48

## 49 **Results**

### 50 **Characteristics of patients in the network and respondents to questionnaire**

51  
52 Respondents were younger and lived closer to their dialysis center than non-respondents (**Table 1**).  
53  
54 Questionnaire response rates differed by country; patients in Portugal were most likely to respond  
55  
56 to the survey (97.4%), with decreasing response rates in Argentina (81.9%), Hungary (81.4%), Poland  
57  
58  
59  
60



1  
2  
3 (74.4%), and Italy (73.6%). Overall, respondents were  $61.0 \pm 15.5$  years, most were men (55.5%),  
4  
5 40.2% had 6 to 8 years of school education, and about half had depressive symptoms according to  
6  
7 the Center for Epidemiological Studies-Depression (CES-D) Scale (score of 18 or above). Two-thirds of  
8  
9 respondents were married (60.8%), most were unemployed (68.8%), and a minority had previously  
10  
11 received a kidney transplant (6.9%).  
12

### 13 14 15 **Survey responses**

16  
17 Fewer than half of respondents rated their overall care as excellent (1057/2271; 46.5% [95%  
18  
19 confidence interval (CI), 44.5 to 48.6%]) and about three-quarters rated their care as excellent or  
20  
21 very good (1783/2271; 78.5% [CI 76.8 to 80.2%]) (**Figure 1**). The proportion rating their overall care  
22  
23 as excellent was lowest in Poland (13.7%), with an increasing proportion in Argentina (30.3%), Italy  
24  
25 (61.2%), Hungary (63.5%), and Portugal (83.8%) (**eTable 1**).  
26  
27

28  
29 **Table 2** shows the association between respondent characteristics and the proportion rating  
30  
31 haemodialysis care as excellent. In analyses clustered by country and controlled for demographic  
32  
33 and clinical variables, older respondents were more likely to consider care excellent (adjusted odds  
34  
35 ratio [AOR] for those 70 years or older, 1.44 [CI, 1.01 to 2.04] compared with those aged 18 to 49  
36  
37 years) and those with depressive symptoms were less likely to consider that care met excellent  
38  
39 standards (AOR, 0.56 [CI, 0.44 to 0.71]). Gender, education, marital status, comorbidity (including  
40  
41 diabetes and cardiovascular disease) and the time spent on dialysis each week were not associated  
42  
43 with perspectives of overall care.  
44  
45

46  
47 **Figure 1** shows the proportion of respondents who considered that nothing about their care could  
48  
49 be better and **eTable 3** provides responses according to clinical, demographic and treatment-based  
50  
51 characteristics. Overall, about one-third of respondents considered that nothing about their care  
52  
53 could be better (486/1477; 32.9% [CI, 30.6% to 35.3%]). Respondents aged 70 years or older (AOR,  
54  
55 2.20 [CI, 1.47 to 3.31]) and those living further away from their dialysis centre (AOR, 1.39 [CI, 1.04 to  
56  
57 1.85]) were more likely to consider that no aspect of their care required improvement. In the four  
58  
59  
60

1  
2  
3 countries in which this question was asked (Argentina, Hungary, Poland, and Portugal), compared  
4  
5 with Argentina, patients in Hungary (AOR, 1.37 [CI, 1.06 to 1.77]) and Poland (AOR, 1.82 [CI, 1.37 to  
6  
7 2.42]) were more likely to consider than nothing about their care needed to be changed.  
8  
9

10  
11 In the four countries in which the question “would you recommend your dialysis centre to a friend or  
12  
13 relative who needed dialysis” was asked, 1022 of 1587 respondents (64.4% [CI, 62.0 to 66.7%])  
14  
15 would definitely recommend their dialysis centre. Older respondents (AOR, 1.84 [CI, 1.24-2.74]) and  
16  
17 those living further from their dialysis centre (AOR, 1.37 [CI, 1.03-1.83]) were more likely to  
18  
19 recommend their dialysis centre to others for care, whereas those with depressive symptoms were  
20  
21 less likely to recommend their care to others (AOR, 0.67 [CI, 0.51 to 0.87]) (eTable 4). Compared to  
22  
23 Argentina, strong recommendations would more likely be made by respondents in Hungary (AOR  
24  
25 2.38 [CI 1.84-3.07]) and Portugal (AOR 28.2 [CI 3.84-207.39]).  
26  
27

28  
29 The five items that respondents rated most frequently as excellent were “attention of staff to  
30  
31 cleanliness of the dialysis vascular access site” (54% ranked as excellent), “caring and helpfulness of  
32  
33 nurses” (53%), “response of staff to pain or discomfort” (51%), “caring, helpfulness and sensitivity of  
34  
35 dialysis staff” (50%), and “ease of reaching staff by telephone” (48%) (Figure 1). The five items rated  
36  
37 least frequently by respondents as excellent were “the amount of information when choosing  
38  
39 dialysis modality”(23%), “the ease of seeing a social worker when needed” (28%), “amount of  
40  
41 information from dialysis staff” (34%), “accuracy of information from nephrologist including  
42  
43 prognosis and likelihood of getting a kidney transplant” (37%), and “accuracy of instructions from  
44  
45 nephrologist” (39%). In general, the amount of caring and concern shown by staff, particularly by  
46  
47 nurses, and the ability of patients to contact dialysis staff were ranked highly, whereas the amount  
48  
49 and delivery of information about treatment choices and prognosis as well as access to social worker  
50  
51 staff and nephrologists were ranked lowest.  
52  
53

54  
55 A composite measure of key performance indicators were similar in the included countries during  
56  
57 the recruitment period (in descending order with a higher value indicating higher performance:  
58  
59  
60

1  
2  
3 Hungary 1535, Portugal 1551, Italy 1543, Poland 1381, and Argentina 1303) and were associated  
4  
5 with the proportion of respondents reporting excellent overall care (for each unit increase in  
6  
7 performance score, the proportion of respondents who ranked care as excellent increased by 0.21%  
8  
9 (95% CI -0.02% to 0.44%).  
10

## 11 12 **Discussion**

13  
14 We report the largest study of patient satisfaction with dialysis care to date and identify specific  
15  
16 deficits in long-term dialysis care across several countries. Most respondents viewed their overall  
17  
18 dialysis care as below excellent and needing improvement. Specifically, while the majority of  
19  
20 respondents approved of the more technical aspects of dialysis treatment (attention to the  
21  
22 cleanliness of the dialysis vascular access site, caring and helpfulness of nurses and dialysis staff, and  
23  
24 attention by staff to immediate needs (pain, discomfort, sterile procedures)), a minority were  
25  
26 satisfied with the more complex and integrated components of care. These were the accuracy and  
27  
28 amount of information given by staff to patients about their dialysis treatment, prognosis and  
29  
30 making choices between peritoneal dialysis and haemodialysis in addition to support from social  
31  
32 worker staff. Older respondents were generally less critical of their haemodialysis care, while those  
33  
34 with depressive symptoms were less frequently satisfied. Other demographic and clinical features  
35  
36 did not reliably influence perceptions of overall care and country of treatment had inconsistent  
37  
38 effects on satisfaction. Better dialysis care performance scores were associated with higher overall  
39  
40 patient satisfaction.  
41  
42  
43  
44

45  
46 Our patients' perspectives together with other similar studies from the United States[19] and The  
47  
48 Netherlands[18] emphasise that deficiencies in dialysis care are consistently found and need to be  
49  
50 considered specifically when conducting research to improve dialysis patient outcomes. This is  
51  
52 particularly relevant as existing interventions in the dialysis setting, including anaemia  
53  
54 management,[7] control of phosphorus[28] and parathyroid hormone levels,[29] dialysis dose and  
55  
56 flux,[9] and starting dialysis earlier[8] have not improved patient-wellbeing despite evaluation in  
57  
58  
59  
60

1  
2  
3 thousands of patients. Our respondents, consistent with the findings of others,[\[30-32\]](#) report  
4  
5 specifically receiving inadequate information about their illness journey and as well as their dialysis  
6  
7 treatment options. In our and other chronic diseases settings, patients report needing more  
8  
9 information about the causes and progression of their disease, disease symptoms and their impact,  
10  
11 and social and financial support.[\[33\]](#) [\[34\]](#) Patients, often due to the competing demands of daily life,  
12  
13 rely on healthcare professional to initiate discussions about care planning and not having future-  
14  
15 oriented conversations reduces patients' capacity for hope.[\[35\]](#) Patients perceive poor  
16  
17 communication as reflecting secrecy, misinformation and insensitivity. Subsequently, inadequate  
18  
19 information reduces the ability of patients and their families to care for themselves and induces  
20  
21 worry.[\[33\]](#) While education strategies increase patients' willingness to choose self-care dialysis,[\[23\]](#)  
22  
23 the wider effect of educational interventions in the dialysis setting that answer unmet questions  
24  
25 about disease trajectory and treatment choices with the aim of improving patient experiences of  
26  
27 end-stage kidney disease are not well understood and warrant larger-scale trials. Research in other  
28  
29 settings suggest specific interventions to improve information provision, such as training and  
30  
31 support for healthcare staff in communication and basic counseling, and overcoming barriers to  
32  
33 good communication including addressing time pressures and understaffed environments and  
34  
35 considering innovative non-written methods might be appropriate complex strategies for trials in  
36  
37 the dialysis setting.[\[33\]](#)

38  
39  
40  
41  
42 This study indicates most patients in dialysis settings want more accurate information about their  
43  
44 prognosis, in line with experiences of other dialysis patients and those who have cancer.[\[35 36\]](#)  
45  
46 Accurate prognostic information empowers patients;[\[37\]](#) when discussions about prognosis do not  
47  
48 occur, patients and their families may (incorrectly) fear the worst. For dialysis patients in our study,  
49  
50 the information they receive about prognosis is frequently unsatisfactory including specifically  
51  
52 understanding their chances of receiving a kidney transplant and their survival. Physicians in other  
53  
54 medical specialties similarly provide insufficient information about prognosis[\[38\]](#) and infrequently  
55  
56 check their patients' understanding during consultations.[\[39\]](#) Physicians commonly find disclosing  
57  
58  
59  
60

1  
2  
3 prognosis stressful and desire more training and guidance for this aspect of clinical practice.[40] Our  
4  
5 findings suggest that meeting patients' expectations about information is an important but  
6  
7 potentially neglected aspect of dialysis care and is consistent with data showing that patients are  
8  
9 infrequently involved in discussions about prognosis and likelihood of transplantation.[32] The effect  
10  
11 of increased clinician training in prognosis provision about survival and transplantation could form  
12  
13 the basis of a testable strategy in future health services research in dialysis.  
14  
15

16  
17 The patient-centred movement in healthcare ('nothing about me without me')[41] has engendered  
18  
19 considerable data on the issues of most importance to patients and their families to highlight the  
20  
21 mismatch between patients' values and the outcomes routinely measured in research and clinical  
22  
23 practice, including for patients with advanced kidney disease.[5 42] While landmark trials in  
24  
25 nephrology over the past three decades have measured treatment effectiveness using biomarker  
26  
27 levels and major cardiovascular events and survival, emerging data show that patients are frequently  
28  
29 willing to forgo survival in exchange for fewer restrictions on their daily life, and prioritize  
30  
31 collaborative research aimed at improving the way they feel, function, and survive.[5 6] In addition,  
32  
33 contemporary studies of communication and educational strategies as well as complex healthcare  
34  
35 service changes in dialysis have used similarly quantitative outcomes to assess treatment  
36  
37 effectiveness, which have included urgent dialysis start, vascular access processes, and survival.[20  
38  
39 21 43] We suggest that, in line with patient-centred data, trials of communication or education for  
40  
41 dialysis patients might consider aspects of quality of life valued by patients as key outcomes for  
42  
43 assessing effectiveness.  
44  
45

46  
47 Notably, patient satisfaction was largely unrelated to most clinical or demographic patient  
48  
49 characteristics despite a large sample size and similar to other studies in the US and The  
50  
51 Netherlands, suggesting that lower satisfaction of many aspects of dialysis care is a global patient  
52  
53 experience. Older patients in this study rated their overall care more highly, consistent with a recent  
54  
55 study of patient perceptions of dialysis care in The Netherlands,[18] and of studies of patient  
56  
57  
58  
59  
60

1  
2  
3 satisfaction across health services more generally,[\[44 45\]](#) despite evidence that older patients may  
4  
5 actually receive lower quality care.[\[46\]](#) In contrast, depressive symptoms markedly reduced  
6  
7 satisfaction in this study, (even when controlling for markers of health status and comorbidity);  
8  
9 similar findings have been reported in other settings.[\[47\]](#) Those with depressive symptoms  
10  
11 voluntarily ration the time they have with medical staff, which may in turn impair patient-clinician  
12  
13 communication and serve to decrease their satisfaction with care overall.[\[47\]](#)  
14  
15

### 16 17 **Limitations of the study**

18 Although we provide considerable satisfaction data for dialysis patients in several countries, our  
19  
20 analysis should be interpreted in light of the study limitations. First, we did not evaluate in detail the  
21  
22 influence of healthcare systems in which the dialysis clinics were situated (including features such as  
23  
24 staffing-levels[\[48\]](#) or number of beds[\[49\]](#)) on patient satisfaction, although we did find an  
25  
26 association between overall satisfaction and global clinical performance. While interpersonal  
27  
28 relations with healthcare workers are the most frequently mentioned by patients when asked to rate  
29  
30 their care, contextual factors relating to conditions of medical services are also described commonly  
31  
32 by patients and often lead to negative comments about healthcare.[\[50\]](#) Second, we took a  
33  
34 quantitative approach to assessing patients' perceptions, which may be suboptimal for  
35  
36 understanding the full range of feelings, values and experiences of receiving dialysis care. In  
37  
38 addition, satisfaction and dissatisfaction may not simply be alternative ends of a single spectrum of  
39  
40 perception and may in fact exist side-by-side within a patient experience of care.[\[51\]](#) Third, we did  
41  
42 not capture satisfaction with a specific healthcare event and surveyed patients who had been  
43  
44 treated with dialysis for 3 years on average. The potential lag between pivotal patient experiences  
45  
46 and the survey may have introduced recall bias.[\[52\]](#) Fourth, we did not capture longitudinal data to  
47  
48 determine any association between perceptions of care and health-related behaviour and outcomes  
49  
50 including healthcare utilization, quality of life, or survival. Finally, the findings in this study may not  
51  
52 be applicable to other dialysis settings including peritoneal dialysis or home-based haemodialysis  
53  
54 care.  
55  
56  
57  
58  
59  
60

### Implications of the study

As measures of patient experience are distinctive indicators of health care quality,<sup>[52]</sup> our analysis suggests several strategies might improve care for patients in the later stages of chronic kidney disease. First, patients need better information about their choices of treatment for end-stage kidney disease including dialysis modalities. A recent systematic review suggests this is optimally provided when the glomerular filtration rate falls below 30 ml/min per 1.73 m<sup>2</sup> and well in advance of preparations for dialysis vascular access.<sup>[30]</sup> Second, formal care strategies that provide patients with information about prognosis and the impact of end-stage kidney disease and its treatments on their life earlier in the course of kidney disease need to be developed and assessed. Current practices for assessing and discussing prognosis are manifestly inadequate<sup>[35]</sup> and our present reliance on individual physicians to initiate such discussions is not meeting the needs of our patients. Third, better delivery of information about dialysis from both nephrologists and dialysis staff is expected by patients and greater understanding of the information that patients need and optimal mode(s) of delivery may improve care.

### Conclusion

This large study of patient satisfaction with different aspects of long-term haemodialysis care suggests that patients' needs are not being fully met. The findings suggest that meeting patient expectations about information on dialysis choices and prognosis may be critical for improving patient experiences of long-term dialysis care and can form the basis for future healthcare services research in the dialysis setting.

### **Acknowledgements**

Dr Strippoli had full access to all of the data in the study and takes responsibility for the integrity of the data and the accuracy of the data analysis.

### **Funding statement**

This study was funded by an unrestricted educational grant from Diaverum. The sole responsibility for decisions made about study design, data collection, data management, analysis and interpretation, writing of the report, review or approval of the manuscript and the decision to submit the manuscript for publication resides with the authors, independent of the study funder.

### **Competing interests**

GS is Senior Vice-President of Scientific Affairs at Diaverum. JH is Senior Vice President Medical Operations - Chief Medical Officer of Diaverum. MR, CW, EC, RG, JNF, MT, ML, AB-S, and JD are employees of Diaverum. SP receives a fellowship from the Consorzio Mario Negri Sud, Italy from provided by an unrestricted educational grant from Amgen Dompé. SP is a 2012 L'Oreal UNESCO For Women in Science Australia and New Zealand Fellow.

### **Ethical approval**

We obtained ethics approval for the analyses of routinely collected data from the University of Sydney Human Research Ethics Committee on 27 February 2013. The authorized personnel are Allison Tong, Jonathan Craig and Giovanni Strippoli. The project number for approval was 2013/031 and included approval of the satisfaction survey, the data custodian (Diaverum) and the survey data dated January 2008.

### **Author contributions**

SP designed the study, interpreted data analysis, wrote the first draft and revised the paper. GdB designed the data analysis, cleaned and analyzed data, and drafted and revised the paper. JCC assisted with study design, interpreted the data analysis, and drafted and revised the paper. AT



1  
2  
3 interpreted the data analysis, and drafted and revised the paper. MT assisted with data collection  
4  
5 tools, interpreted the data analysis, and drafted revised the paper. FP interpreted the data analysis,  
6  
7 and revised the paper. MR monitored data collection for the whole study, assisted with data  
8  
9 collection and cleaning, and interpreted the data analysis, and revised the paper. JH and CW  
10  
11 interpreted the data analysis, and revised the paper. EC, RG, JNF, MT, ML, AB-S, and JD assisted with  
12  
13 data collection, and interpreted the data analysis, and revised the paper. GFMS designed the study  
14  
15 and data collection tools, monitored data collection for the whole study, interpreted the data  
16  
17 analysis, and drafted and revised the paper. He is the guarantor. All authors had full access to all of  
18  
19 the data (including statistical reports and tables) in the study and can take responsibility for the  
20  
21 integrity of the data and the accuracy of the data analysis.  
22  
23  
24

#### 25 **Presentation as abstract**

26  
27 This paper has previously been presented in abstract form at the American Society of Nephrology  
28  
29 Kidney Week 2013, Atlanta, as a poster communication on Friday, November 8, 2013.  
30  
31

#### 32 **Data sharing statement**

33  
34  
35 None available  
36  
37  
38  
39  
40  
41  
42  
43  
44  
45  
46  
47  
48  
49  
50  
51  
52  
53  
54  
55  
56  
57  
58  
59  
60

## References

1. U S Renal Data System, USRDS 2012 Annual Data Report: Atlas of Chronic Kidney Disease and End-Stage Renal Disease in the United States, National Institutes of Health, National Institute of Diabetes and Digestive and Kidney Diseases, Bethesda, MD, 2012.
2. Evans RW, Manninen DL, Garrison LP, Jr., Hart LG, Blagg CR, Gutman RA, Hull AR, Lowrie EG. The quality of life of patients with end-stage renal disease. *New Engl J Med* 312:553-9, 1985
3. Wyld M, Morton RL, Hayen A, Howard K, Webster AC. A systematic review and meta-analysis of utility-based quality of life in chronic kidney disease treatments. *PLoS Med* 9:e1001307, 2012
4. Murtagh FE, ddington-Hall J, Higginson IJ. The prevalence of symptoms in end-stage renal disease: a systematic review. *Adv Chronic Kidney Dis* 14:82-99, 2007
5. Tong A, Sainsbury P, Carter SM, Hall B, Harris DC, Walker RG, Hawley CM, Chadban S, Craig JC. Patients' priorities for health research: focus group study of patients with chronic kidney disease. *Nephrol Dial Transplant* 23:3206-14, 2008
6. Morton RL, Snelling P, Webster AC, Rose J, Masterson R, Johnson DW, Howard K. Dialysis modality preference of patients with CKD and family caregivers: a discrete-choice study. *Am J Kidney Dis* 60:102-11, 2012
7. Phrommintikul A, Haas SJ, Elsik M, Krum H. Mortality and target haemoglobin concentrations in anaemic patients with chronic kidney disease treated with erythropoietin: a meta-analysis. *Lancet* 369:381-8, 2007
8. Cooper BA, Branley P, Bulfone L, Collins JF, Craig JC, Fraenkel MB, Harris A, Johnson DW, Kesselhut J, Li JJ, Luxton G, Pilmore A, Tiller DJ, Harris DC, Pollock CA. A randomized, controlled trial of early versus late initiation of dialysis. *N Engl J Med* 363:609-19, 2010
9. Eknoyan G, Beck GJ, Cheung AK, Daugirdas JT, Greene T, Kusek JW, Allon M, Bailey J, Delmez JA, Depner TA, Dwyer JT, Levey AS, Levin NW, Milford E, Ornt DB, Rocco MV, Schulman G, Schwab SJ, Teehan BP, Toto R. Effect of dialysis dose and membrane flux in maintenance hemodialysis. *N Engl J Med* 347:2010-9, 2002
10. Effect of cinacalcet on cardiovascular disease in patients undergoing dialysis. *N Engl J Med* 2012

- 1  
2  
3 11. Besarab A, Bolton WK, Browne JK, Egrie JC, Nissenson AR, Okamoto DM, Schwab SJ, Goodkin DA.  
4 The effects of normal as compared with low hematocrit values in patients with cardiac  
5 disease who are receiving hemodialysis and epoetin. *N Engl J Med* 339:584-90, 1998  
6  
7  
8  
9 12. Nissenson AR. Improving Outcomes for ESRD Patients: Shifting the Quality Paradigm. *Clin J Am*  
10 *Soc Nephrol* 2013  
11  
12  
13 13. Jansen DL, Heijmans MJ, Rijken M, Spreeuwenberg P, Grootendorst DC, Dekker FW, Boeschoten  
14 EW, Kaptein AA, Groenewegen PP. Illness perceptions and treatment perceptions of patients  
15 with chronic kidney disease: Different phases, different perceptions? *Br J Health Psychol*  
16 2012  
17  
18  
19  
20 14. Federal Register Centers for Medicare and Medicaid Services 42 CFR Parts 413 and 414. Medicare  
21 Program; End-Stage renal Disease Prospective Payment System and Quality Incentive  
22 Program; Ambulance fee Schedule; Durable Medical Equipment; and Competitive  
23 Acquisition of Certain Durable Medical Equipment, Prosthetics, Orthotics, and Supplies.  
24 Available at <http://www.gpo.gov/fdsys/pkg/FR-2011-11-10/pdf/2011-28606.pdf>. Accessed  
25 on November 23, 2012.  
26  
27  
28  
29  
30  
31 15. Lacson E, Jr., Wang W, Lazarus JM, Hakim RM. Hemodialysis facility-based quality-of-care  
32 indicators and facility-specific patient outcomes. *Am J Kidney Dis* 54:490-7, 2009  
33  
34  
35 16. Plantinga LC, Fink NE, Jaar BG, Sadler JH, Levin NW, Coresh J, Klag MJ, Powe NR. Attainment of  
36 clinical performance targets and improvement in clinical outcomes and resource use in  
37 hemodialysis care: a prospective cohort study. *BMC Health Serv Res* 7:5, 2007  
38  
39  
40  
41 17. Vanholder R, Davenport A, Hannedouche T, Kooman J, Kribben A, Lameire N, Lonnemann G,  
42 Magner P, Mendelssohn D, Saggi SJ, Shaffer RN, Moe SM, Van Biesen W, van der Sande F,  
43 Mehrotra R. Reimbursement of dialysis: a comparison of seven countries. *J Am Soc Nephrol*  
44 23:1291-8, 2012  
45  
46  
47  
48 18. van der Veer SN, Arah OA, Visserman E, Bart HA, de Keizer NF, Abu-Hanna A, Heuveling LM,  
49 Stronks K, Jager KJ. Exploring the relationships between patient characteristics and their  
50 dialysis care experience. *Nephrol Dial Transplant* 27:4188-96, 2012  
51  
52  
53  
54 19. Rubin HR, Fink NE, Plantinga LC, Sadler JH, Kliger AS, Powe NR. Patient ratings of dialysis care  
55 with peritoneal dialysis vs hemodialysis. *JAMA* 291:697-703, 2004  
56  
57  
58  
59  
60

- 1  
2  
3 20. Devins GM, Mendelssohn DC, Barre PE, Taub K, Binik YM. Predialysis psychoeducational  
4 intervention extends survival in CKD: a 20-year follow-up. *Am J Kidney Dis* 46:1088-98, 2005  
5  
6  
7 21. Jungers P, Massy ZA, Nguyen-Khoa T, Choukroun G, Robino C, Fakhouri F, Touam M, Nguyen AT,  
8 Grunfeld JP. Longer duration of predialysis nephrological care is associated with improved  
9 long-term survival of dialysis patients. *Nephrol Dial Transplant* 16:2357-64, 2001  
10  
11  
12  
13 22. Winkelmayer WC, Owen WF, Jr., Levin R, Avorn J. A propensity analysis of late versus early  
14 nephrologist referral and mortality on dialysis. *J Am Soc Nephrol* 14:486-92, 2003  
15  
16  
17 23. Manns BJ, Taub K, Vanderstraeten C, Jones H, Mills C, Visser M, McLaughlin K. The impact of  
18 education on chronic kidney disease patients' plans to initiate dialysis with self-care dialysis:  
19 a randomized trial. *Kidney Int* 68:1777-83, 2005  
20  
21  
22  
23 24. Bayliss E, Bhardwaja B, Ross C, Beck A, Lanese D. Multidisciplinary team care may slow the rate  
24 of decline in renal function. *Clin J Am Soc Nephrol* 6:704-10, 2011  
25  
26  
27 25. Rubin HR, Jenckes M, Fink NE, Meyer K, Wu AW, Bass EB, Levin N, Powe NR. Patient's view of  
28 dialysis care: development of a taxonomy and rating of importance of different aspects of  
29 care. CHOICE study. Choices for Healthy Outcomes in Caring for ESRD. *Am J Kidney Dis*  
30 30:793-801, 1997  
31  
32  
33  
34 26. Snijders TAB, Bosker R. *Multilevel analysis: An introduction to basic and advanced multilevel*  
35 *modeling*. London: Sage, 1999.  
36  
37  
38  
39 27. Sullivan LM, Dukes KA, Losina E. Tutorial in biostatistics. An introduction to hierarchical linear  
40 modelling. *Stat Med* 18:855-88, 1999  
41  
42  
43 28. Suki WN, Zabaneh R, Cangiano JL, Reed J, Fischer D, Garrett L, Ling BN, Chasan-Taber S, Dillon  
44 MA, Blair AT, Burke SK. Effects of sevelamer and calcium-based phosphate binders on  
45 mortality in hemodialysis patients. *Kidney Int* 72:1130-7, 2007  
46  
47  
48  
49 29. Palmer SC, Nistor I, Craig JC, Pellegrini F, Messa P, Tonelli M, Covic A, Strippoli GF. Cinacalcet in  
50 patients with chronic kidney disease: a cumulative meta-analysis of randomized controlled  
51 trials. *PLoS Med* 10:e1001436, 2013  
52  
53  
54  
55 30. Morton RL, Tong A, Howard K, Snelling P, Webster AC. The views of patients and carers in  
56 treatment decision making for chronic kidney disease: systematic review and thematic  
57 synthesis of qualitative studies. *BMJ* 340:c112, 2010  
58  
59  
60

- 1  
2  
3 31. Ormandy P. Information topics important to chronic kidney disease patients: a systematic  
4 review. *J Ren Care* 34:19-27, 2008  
5  
6  
7 32. Wachterman M, Marcantonio E, Davis R, Cohen R, Waikar S, Phillips R, McCarthy E. Relationship  
8 between the prognostic expectations of seriously ill patients undergoing hemodialysis and  
9 their nephrologists. *JAMA Intern Med* 173:1206-14, 2013  
10  
11  
12 33. Selman L, Higginson IJ, Agupio G, Dinat N, Downing J, Gwyther L, Mashao T, Mmoledi K, Moll AP,  
13 Sebuyira LM, Panajatovic B, Harding R. Meeting information needs of patients with incurable  
14 progressive disease and their families in South Africa and Uganda: multicentre qualitative  
15 study. *BMJ* 338:b1326, 2009  
16  
17  
18 34. Francis V, Korsch BM, Morris MJ. Gaps in doctor-patient communication. *New England Journal of*  
19 *Medicine* 280:535-40, 1969  
20  
21  
22 35. Davison SN, Simpson C. Hope and advance care planning in patients with end stage renal disease:  
23 qualitative interview study. *BMJ* 333:886, 2006  
24  
25  
26 36. Hagerty RG, Butow PN, Ellis PM, Dimitry S, Tattersall MH. Communicating prognosis in cancer  
27 care: a systematic review of the literature. *Ann Oncol* 16:1005-53, 2005  
28  
29  
30 37. Mack JW, Wolfe J, Cook EF, Grier HE, Cleary PD, Weeks JC. Hope and prognostic disclosure. *J Clin*  
31 *Oncol* 25:5636-42, 2007  
32  
33  
34 38. Audrey S, Abel J, Blazeby JM, Falk S, Campbell R. What oncologists tell patients about survival  
35 benefits of palliative chemotherapy and implications for informed consent: qualitative study.  
36 *BMJ* 337:a752, 2008  
37  
38  
39 39. Gattellari M, Voigt KJ, Butow PN, Tattersall MH. When the treatment goal is not cure: are cancer  
40 patients equipped to make informed decisions? *J Clin Oncol* 20:503-13, 2002  
41  
42  
43 40. Fallowfield L, Jenkins V. Communicating sad, bad, and difficult news in medicine. *The Lancet*  
44 363:312-19, 2004  
45  
46  
47 41. Barry MJ, Edgman-Levitan S. Shared Decision Making — The Pinnacle of Patient-Centered Care.  
48 *New England Journal of Medicine* 366:780-81, 2012  
49  
50  
51 42. Howell M, Tong A, Wong G, Craig JC, Howard K. Important outcomes for kidney transplant  
52 recipients: a nominal group and qualitative study. *Am J Kidney Dis* 60:186-96, 2012  
53  
54  
55  
56  
57  
58  
59  
60

- 1  
2  
3 43. Levin A, Lewis M, Mortiboy P, Faber S, Hare I, Porter EC, Mendelsohn DC. Multidisciplinary  
4 predialysis programs: Quantification and limitations of their impact on patient outcomes in  
5 two Canadian settings. *American Journal of Kidney Diseases* 29:533-40, 1997  
6  
7  
8  
9 44. Bowling A. An "inverse satisfaction law"? Why don't older patients criticise health services? *J*  
10 *Epidemiol Community Health* 56:482, 2002  
11  
12  
13 45. Jaipaul CK, Rosenthal GE. Are older patients more satisfied with hospital care than younger  
14 patients? *J Gen Intern Med* 18:23-30, 2003  
15  
16  
17 46. Meehan T, Fine MJ, Krumholz HM, Scinto J, Galusha D, Mockalis J, Weber G, Petrillo M, Houck P,  
18 Fine J. Quality of care, process, and outcomes in elderly patients with pneumonia. *JAMA: The*  
19 *Journal of the American Medical Association* 278:2080-84, 1997  
20  
21  
22  
23 47. Schenker Y, Stewart A, Na B, Whooley MA. Depressive symptoms and perceived doctor-patient  
24 communication in the Heart and Soul study. *J Gen Intern Med* 24:550-6, 2009  
25  
26  
27 48. Needleman J, Buerhaus P, Mattke S, Stewart M, Zelevinsky K. Nurse-staffing levels and the  
28 quality of care in hospitals. *N Engl J Med* 346:1715-22, 2002  
29  
30  
31 49. Jha AK, Orav EJ, Zheng J, Epstein AM. Patients' perception of hospital care in the United States. *N*  
32 *Engl J Med* 359:1921-31, 2008  
33  
34  
35  
36 50. Marcinowicz L, Chlabicz S, Grebowski R. Patient satisfaction with healthcare provided by family  
37 doctors: primary dimensions and an attempt at typology. *BMC Health Serv Res* 9:63, 2009  
38  
39  
40 51. Coyle J. Exploring the meaning of "dissatisfaction" with health care: The importance of "personal  
41 identity threat". *Sociol Health Illn* 21:95-124, 1999  
42  
43  
44 52. Manary MP, Boulding W, Staelin R, Glickman SW. The Patient Experience and Health Outcomes.  
45 *New England Journal of Medicine* 368:201-03, 2013  
46  
47  
48  
49  
50  
51  
52  
53  
54  
55  
56  
57  
58  
59  
60

1  
2  
3 **Figure Legends**  
4  
5  
6

7 **Figure 1** Probabilities of excellent or very good ratings of overall care by dialysis patients  
8  
9  
10  
11  
12  
13  
14  
15  
16  
17  
18  
19  
20  
21  
22  
23  
24  
25  
26  
27  
28  
29  
30  
31  
32  
33  
34  
35  
36  
37  
38  
39  
40  
41  
42  
43  
44  
45  
46  
47  
48  
49  
50  
51  
52  
53  
54  
55  
56  
57  
58  
59  
60

For peer review only

1  
2  
3  
4  
5  
6  
7  
8  
9  
10  
11  
12  
13  
14  
15  
16  
17  
18  
19  
20  
21  
22  
23  
24  
25  
26  
27  
28  
29  
30  
31  
32  
33  
34  
35  
36  
37  
38  
39  
40  
41  
42  
43  
44  
45  
46  
47  
48  
49

**Figure 1** Probabilities of excellent or very good ratings of overall care by dialysis patients

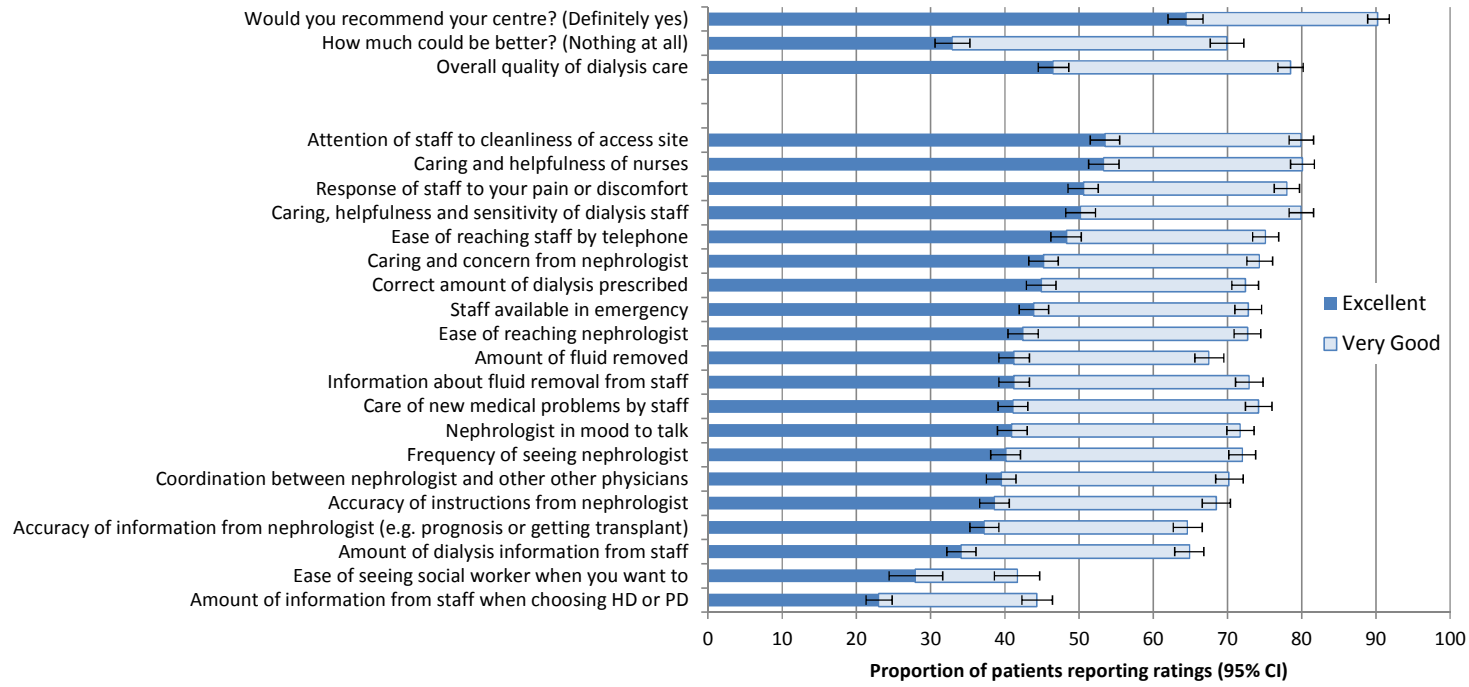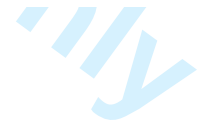



## Tables

**Table 1 | Characteristics of participants who responded and those who did not respond to satisfaction survey**

| Characteristic                                                         | Complete or partial response to survey (n=2145) | No response to survey (n=603) | P value |
|------------------------------------------------------------------------|-------------------------------------------------|-------------------------------|---------|
| Age, years                                                             | 61.0 (15.5)                                     | 62.7 (14.8)                   | 0.04    |
| Gender, n (%) male                                                     | 1190 (55.5)                                     | 314 (52.1)                    | 0.14    |
| Highest school education                                               |                                                 |                               |         |
| ≤ 5 years                                                              | 847 (42.1)                                      | 238 (41.6)                    | 0.82    |
| >5 years                                                               | 1163 (57.9)                                     | 334 (58.4)                    |         |
| Depression score (Center for Epidemiological Studies-Depression Scale) |                                                 |                               |         |
| < 18                                                                   | 947 (49.6)                                      | 67 (46.7)                     | 0.25    |
| ≥ 18                                                                   | 963 (50.4)                                      | 83 (55.3)                     |         |
| Married                                                                | 1303 (60.8)                                     | 377 (62.5)                    | 0.43    |
| Living alone                                                           | 275 (13.0)                                      | 97 (16.2)                     | 0.04    |
| Distance of housing from dialysis unit                                 |                                                 |                               | 0.001   |
| < 20 kilometres                                                        | 1540 (73.1)                                     | 392 (65.8)                    |         |
| > 20 kilometres                                                        | 567 (26.9)                                      | 204 (34.2)                    |         |
| Active on waiting list for transplant                                  | 309 (14.4)                                      | 72 (11.9)                     | 0.12    |
| Previous kidney transplant                                             | 148 (6.9)                                       | 28 (4.7)                      | 0.05    |
| Employment                                                             |                                                 |                               | 0.002   |
| Employed                                                               | 331 (15.7)                                      | 76 (12.9)                     |         |
| Unemployed                                                             | 1451 (68.8)                                     | 450 (76.1)                    |         |
| Receiving benefit/pension                                              | 328 (15.6)                                      | 65 (11.0)                     |         |
| Comorbid conditions                                                    |                                                 |                               |         |
| Diabetes mellitus                                                      | 486 (23.5)                                      | 146 (25.1)                    | 0.42    |
| Hypertension                                                           | 1347 (68.5)                                     | 376 (70.3)                    | 0.65    |
| Prior cardiovascular event                                             | 472 (22.0)                                      | 124 (20.6)                    | 0.45    |
| Time on dialysis, months                                               | 37.3 (16.3-70.9)                                | 36.0 (17.0-75.7)              | 0.69    |
| Dialysis treatment time, minutes per session                           | 235.9 (20.5)                                    | 234.3 (23.5)                  | 0.35    |
| Dialysis adequacy, single pool Kt/V                                    | 1.6 (0.3)                                       | 1.5 (0.3)                     | 0.02    |
| Interdialytic weight gain, kg                                          | 2.29 (1.03)                                     | 2.37 (1.09)                   | 0.16    |
| Serum values                                                           |                                                 |                               |         |
| Haemoglobin, g/l                                                       | 11.0 (1.4)                                      | 11.0 (1.3)                    | 0.31    |
| Systolic blood pressure, mmHg                                          | 130.0 (18.0)                                    | 128.4 (17.3)                  | 0.07    |
| Serum albumin, g/l                                                     | 3.9 (0.5)                                       | 3.9 (0.5)                     | 0.73    |
| Serum phosphorus, mmol/l                                               | 4.6 (1.4)                                       | 4.6 (1.4)                     | 0.69    |
| Serum ferritin, µg/l                                                   | 430 (242-660)                                   | 409 (242-672)                 | 0.71    |
| Serum parathyroid hormone, pmol/l                                      | 282 (162-481)                                   | 287 (167-530)                 | 0.23    |
| Antidepressant medication                                              | 113 (5.3)                                       | 26 (4.3)                      | 0.34    |
| Anxiolytic medication                                                  | 291 (13.6)                                      | 86 (14.3)                     | 0.66    |
| Country                                                                |                                                 |                               | <0.0001 |
| Argentina                                                              | 549 (81.9)                                      | 121 (18.1)                    |         |
| Hungary                                                                | 556 (81.4)                                      | 127 (18.6)                    |         |
| Italy                                                                  | 648 (73.6)                                      | 232 (26.4)                    |         |
| Poland                                                                 | 355 (74.4)                                      | 122 (25.6)                    |         |
| Portugal                                                               | 37 (97.4)                                       | 1 (2.6)                       |         |

Data are expressed as mean (SD), number (%), or median (25<sup>th</sup> percentile, 75<sup>th</sup> percentile). Kt/V refers to the clearance of urea and is a measure of the amount of dialysis received.

**Table 2 | Proportion of patients who gave an excellent rating to overall haemodialysis care according to patient characteristics**

| Characteristic                                            | Excellent rating<br>N (%) | Other rating<br>N (%) | Unadjusted odds<br>ratio | Clustering and case-<br>mix adjusted odds<br>ratio |
|-----------------------------------------------------------|---------------------------|-----------------------|--------------------------|----------------------------------------------------|
| Age                                                       |                           |                       |                          |                                                    |
| 18-49 years                                               | 183 (19.1)                | 300 (28.1)            | 1.00 (reference)         | 1.00                                               |
| 50-59 years                                               | 146 (15.3)                | 215 (20.1)            | 1.11 (0.84-1.47)         | 1.01 (0.70-1.44)                                   |
| 59-69 years                                               | 221 (23.1)                | 218 (20.4)            | 1.66 (1.28-2.16)         | 1.18 (0.82-1.69)                                   |
| ≥70 years                                                 | 406 (42.5)                | 335 (31.4)            | 1.99 (1.57-2.51)         | 1.44 (1.01-2.04)                                   |
| Male gender                                               | 466 (46.1)                | 483 (43.1)            | 1.13 (0.95-1.34)         | 1.12 (0.88-1.44)                                   |
| Highest school education                                  |                           |                       |                          |                                                    |
| ≤5 years                                                  | 465 (49.0)                | 375 (35.8)            | 1.72 (1.44-2.06)         | 0.95 (0.74-1.21)                                   |
| >5 years                                                  | 485 (51.1)                | 673 (64.2)            | 1.00 (reference)         | 1.00                                               |
| Occupational status                                       |                           |                       |                          |                                                    |
| Employed                                                  | 120 (12.0)                | 209 (19.0)            | 0.59 (0.46-0.75)         | 0.79 (0.56-1.12)                                   |
| Unemployed or pension                                     | 876 (88.0)                | 893 (81.0)            | 1.00                     | 1.00                                               |
| Married                                                   | 601 (59.4)                | 693 (61.8)            | 0.91 (0.76-1.08)         | 0.86 (0.67-1.10)                                   |
| Distance of housing from dialysis unit                    |                           |                       |                          |                                                    |
| <20 kilometres                                            | 741 (73.9)                | 792 (72.5)            | 1.00                     | 1.00                                               |
| >20 kilometres                                            | 262 (26.1)                | 300 (27.5)            | 0.93 (0.77-1.13)         | 1.18 (0.91-1.54)                                   |
| Waiting list for kidney transplant                        | 131 (13.0)                | 176 (15.7)            | 0.80 (0.63-1.02)         | 0.80 (0.56-1.14)                                   |
| Comorbid conditions                                       |                           |                       |                          |                                                    |
| Diabetes mellitus                                         | 249 (25.4)                | 233 (21.6)            | 1.24 (1.01-1.52)         | 1.38 (0.78-2.46)                                   |
| Prior cardiovascular event                                | 248 (24.5)                | 220 (19.6)            | 1.33 (1.08-1.63)         | 0.89 (0.63-1.26)                                   |
| Center for Epidemiological Studies-Depression Scale score |                           |                       |                          |                                                    |
| <18                                                       | 472 (52.5)                | 472 (47.2)            | 1.00 (reference)         | 1.00 (reference)                                   |
| ≥18                                                       | 427 (47.5)                | 527 (52.8)            | 0.81 (0.68-0.97)         | 0.56 (0.44-0.71)                                   |
| Dialysis adequacy, <i>single pool Kt/V</i>                |                           |                       |                          |                                                    |
| <1.4                                                      | 202 (20.6)                | 245 (22.2)            | 1.00 (reference)         | 1.00                                               |
| ≥1.4                                                      | 778 (79.4)                | 856 (77.8)            | 1.10 (0.89-1.36)         | 1.11 (0.83-1.49)                                   |
| Serum phosphorus, mmol/l                                  |                           |                       |                          |                                                    |
| <1.45                                                     | 516 (51.5)                | 509 (45.9)            | 1.00 (reference)         | 1.00                                               |
| ≥1.45                                                     | 486 (48.5)                | 601 (54.1)            | 0.80 (0.67-0.95)         | 0.96 (0.76-1.23)                                   |
| Haemoglobin, g/l                                          |                           |                       |                          |                                                    |
| <110                                                      | 476 (47.6)                | 537 (48.2)            | 1.00 (reference)         | 1.00                                               |
| ≥110                                                      | 525 (52.4)                | 578 (51.8)            | 1.02 (0.86-1.22)         | 0.90 (0.71-1.14)                                   |
| Albumin, g/dl                                             |                           |                       |                          |                                                    |
| <3.8                                                      | 371 (37.8)                | 369 (33.7)            | 1.00 (reference)         | 1.00                                               |
| 3.8-4.0                                                   | 277 (28.2)                | 324 (29.6)            | 0.85 (0.69-1.05)         | 1.07 (0.80-1.42)                                   |
| ≥4.1                                                      | 333 (33.9)                | 401 (36.6)            | 0.83 (0.67-1.01)         | 0.78 (0.58-1.05)                                   |
| Systolic blood pressure, mmHg                             |                           |                       |                          |                                                    |
| ≤120                                                      | 270 (27.2)                | 353 (32.1)            | 1.00 (reference)         | 1.00                                               |
| 121-140                                                   | 404 (40.6)                | 441 (40.0)            | 1.20 (0.97-1.47)         | 0.89 (0.67-1.19)                                   |
| ≥140                                                      | 320 (32.2)                | 307 (27.9)            | 1.36 (1.09-1.70)         | 1.03 (0.76-1.40)                                   |
| Country                                                   |                           |                       |                          |                                                    |
| Poland                                                    | 48 (4.8)                  | 303 (27.0)            | 0.09 (0.07-0.13)         | -                                                  |
| Argentina                                                 | 172 (17.0)                | 372 (33.2)            | 0.28 (0.22-0.35)         | -                                                  |
| Italy                                                     | 405 (40.1)                | 242 (21.6)            | 1.00 (reference)         | -                                                  |
| Hungary                                                   | 355 (35.1)                | 198 (17.7)            | 1.07 (0.85-1.36)         | -                                                  |
| Portugal                                                  | 31 (3.1)                  | 6 (0.5)               | 3.09 (1.27-7.51)         | -                                                  |

Clustering and case-mix adjusted model controlled for age, gender, education level, occupational status, marital status, distance from dialysis centre, activity on transplant waiting list, comorbid conditions (diabetes, hypertension, cardiovascular event) depression score, cause of end-stage kidney disease, duration of dialysis per session and dialysis dose, dialysis adequacy (Kt/V), serum values (haemoglobin; phosphorus) and country.

# Supplement

## eAppendix CHOICE Satisfaction Questionnaire

We want your opinion on the quality of the medical care you receive for your dialysis treatment. Please choose the answer than best reflects your views for each of the questions below. There is no right or wrong answer. We want your opinions.

| Please rate the following ( <i>Fill in the corresponding circle on each line</i> ): |                                                                                                               | Poor                  | Fair                  | Good                  | Very Good             | Excellent             | Not Applicable to me           |
|-------------------------------------------------------------------------------------|---------------------------------------------------------------------------------------------------------------|-----------------------|-----------------------|-----------------------|-----------------------|-----------------------|--------------------------------|
| 1.                                                                                  | How easy is it to reach the kidney doctor                                                                     | <input type="radio"/>          |
| 2.                                                                                  | The nephrologist's caring and concern about you                                                               | <input type="radio"/>          |
| 3.                                                                                  | How often the nephrologist sees you                                                                           | <input type="radio"/>          |
| 4.                                                                                  | How often the nephrologist is in a mood to talk with patients                                                 | <input type="radio"/>          |
| 5.                                                                                  | How accurate the nephrologist is about information like your chance of doing well or of getting a transplant  | <input type="radio"/>          |
| 6.                                                                                  | How accurate the nephrologist's instructions to you are                                                       | <input type="radio"/>          |
| 7.                                                                                  | How well the nephrologist makes sure the amount of dialysis you are getting is just right for you             | <input type="radio"/>          |
| 8.                                                                                  | How well the nephrologist and other doctors you see coordinate with each other                                | <input type="radio"/>          |
| 9.                                                                                  | How easy it is to reach your dialysis center by telephone                                                     | <input type="radio"/>          |
| 10.                                                                                 | How much attention doctors and nurses pay to cleanliness when they work with your IV or access site           | <input type="radio"/>          |
| 11.                                                                                 | How helpful and caring the nurses at your dialysis center are                                                 | <input type="radio"/>          |
| 12.                                                                                 | How sensitive, helpful, and caring your dialysis center staff are                                             | <input type="radio"/>          |
| 13.                                                                                 | How well your dialysis center staff responds when you say you are in pain or uncomfortable                    | <input type="radio"/>          |
| 14.                                                                                 | The number and kind of staff available to help you in an emergency                                            | <input type="radio"/>          |
| 15.                                                                                 | How much information you are being given about dialysis                                                       | <input type="radio"/>          |
| 16.                                                                                 | The amount of information you are being given to help you choose between hemodialysis and peritoneal dialysis | <input type="radio"/>          |
| 17.                                                                                 | How much information you are given about the amount of fluid to take in and take off                          | <input type="radio"/>          |
| 18.                                                                                 | How much fluid is removed during your dialysis session                                                        | <input type="radio"/>          |
| 19.                                                                                 | How easy it is to meet the social worker when you want to                                                     | <input type="radio"/>          |
| 20.                                                                                 | How well new medical problems taken care of by the dialysis center staff when they arise                      | <input type="radio"/>          |
| 21.                                                                                 | How would you rate the quality of care you have received as a dialysis patient, overall                       | <input type="radio"/>          |
| 22.                                                                                 | Thinking about your dialysis care overall, how much could be better                                           | <input type="radio"/>          |
|                                                                                     | Many things                                                                                                   |                       | A few things          |                       | One or two things     |                       | Nothing could be better at all |
| 22.                                                                                 | Would you recommend your dialysis center to a friend or relative who needs dialysis                           | <input type="radio"/>          |
|                                                                                     | Definitely not                                                                                                |                       | Probably not          |                       | Not sure              |                       | Probably yes                   |
|                                                                                     |                                                                                                               |                       |                       |                       |                       |                       | Definitely yes                 |

**Thank you for completing this survey. Please put your survey in the envelope, seal it, and give it to the clinic coordinator.**

eTable 1 | Percentage of patients who rated care as excellent overall and according to country

| Satisfaction Domain and Item            | Overall cohort | Italy      | Argentina  | Hungary    | Poland    | Portugal  |
|-----------------------------------------|----------------|------------|------------|------------|-----------|-----------|
| <b>Nephrologist</b>                     |                |            |            |            |           |           |
| 1. Ease of reaching                     | 983/2316       | 375 (54.1) | 159 (26.3) | 351 (58.7) | 69 (18.0) | 29 (78.4) |
| 2. Caring and concern                   | 1049/2321      | 426 (61.2) | 151 (24.9) | 365 (61.0) | 76 (19.8) | 31 (83.8) |
| 3. Frequency of seeing                  | 928 /2316      | 395 (56.8) | 121 (20.0) | 320 (53.8) | 64 (16.7) | 28 (75.7) |
| 4. In mood to talk                      | 945/2308       | 414 (59.8) | 121 (21.8) | 297 (50.0) | 74 (19.3) | 29 (78.4) |
| 5. Accuracy of information              | 851/2286       | 343 (50.4) | 105 (17.4) | 331 (56.5) | 45 (11.8) | 27 (73.0) |
| 6. Accuracy of instructions             | 889/2302       | 359 (52.3) | 111 (18.4) | 340 (57.4) | 52 (13.6) | 27 (75.0) |
| 7. Correct amount of dialysis           | 1030/2295      | 479 (68.6) | 100 (17.0) | 375 (63.6) | 48 (12.6) | 28 (75.7) |
| 8. Coordination with other physicians   | 909/2302       | 397 (57.2) | 147 (24.5) | 285 (48.4) | 53 (13.8) | 27 (73.0) |
| <b>Dialysis Staff</b>                   |                |            |            |            |           |           |
| 9. Ease of reaching staff               | 1110/2299      | 458 (66.1) | 143 (23.9) | 428 (72.4) | 51 (13.4) | 30 (81.1) |
| 10. Attention to cleanliness of access  | 1235/2308      | 487 (69.9) | 196 (23.7) | 452 (76.2) | 69 (18.1) | 31 (83.8) |
| 11. Caring of nurses                    | 1238/2321      | 470 (67.2) | 214 (35.3) | 449 (75.3) | 74 (19.3) | 3 (83.8)  |
| 12. Caring of staff                     | 1166/2322      | 442 (63.1) | 193 (31.8) | 423 (71.1) | 77 (20.2) | 31 (83.8) |
| 13. Response to pain                    | 1162/2298      | 492 (71.1) | 192 (32.1) | 408 (68.5) | 40 (10.7) | 30 (81.1) |
| 14. Staff available in emergency        | 1001/2281      | 448 (64.9) | 116 (19.6) | 375 (63.7) | 33 (8.9)  | 29 (78.4) |
| 15. Amount of dialysis information      | 776/2273       | 303 (44.4) | 90 (15.3)  | 321 (53.8) | 34 (9.2)  | 28 (75.7) |
| 16. Amount of information on            | 513/2230       | 175 (26.5) | 70 (12.0)  | 229 (39.5) | 12 (3.3)  | 27 (73.0) |
| 17. Information about fluid removal     | 1041/2268      | 441 (63.4) | 127 (21.8) | 412 (70.0) | 35 (9.6)  | 26 (70.3) |
| 18. Amount of fluid removed             | 917/2226       | 421 (60.7) | 80 (14.3)  | 367 (62.3) | 22 (6.3)  | 27 (73.0) |
| 19. Ease of seeing social worker*       | 162/585        | -          | -          | 162 (27.7) | -         | -         |
| 20. New medical problems                | 927/2256       | 375 (54.6) | 148 (25.7) | 355 (60.0) | 20 (5.5)  | 29 (78.4) |
| <b>Overall Ratings</b>                  |                |            |            |            |           |           |
| 21. Quality of dialysis care            | 1057/2271      | 424 (61.2) | 177 (30.3) | 375 (63.5) | 50 (13.7) | 31 (83.8) |
| 22. How much could be better? **        | 518/1575       | -          | 162 (27.7) | 201 (34.1) | 148       | 7 (20.6)  |
| 23. Would you recommend your center? ** | 1022/1587      | -          | 330 (56.5) | 433 (73.9) | 223       | 36 (97.3) |

\*Question 19 was present only in the Hungarian version of the survey

\*\*Questions 22 and 23 were not included in the Italian version of the questionnaire

**eTable 2 | Key performance indicators**

---

| Key performance indicators                                            |
|-----------------------------------------------------------------------|
| Kt/V $\geq$ 1.4                                                       |
| Albumin $\geq$ 35 g/l                                                 |
| nPCR $\geq$ 1.0 g/kg/day                                              |
| Haemoglobin $\geq$ 10.0 and $\leq$ 12.0 g/dl                          |
| Ferritin $\geq$ 200 and $\leq$ 500 ng/ml                              |
| Phosphorus $\geq$ 3.5 and $\leq$ 5.5 mg/dl                            |
| Calcium by phosphorus product $<$ 55 mg <sup>2</sup> /dl <sup>2</sup> |
| Parathyroid hormone $\geq$ 150 pg/ml and $\leq$ 300 pg/ml             |
| Mean arterial pressure $<$ 105 mmHg                                   |
| Interdialytic weight gain $<$ 4 %                                     |
| Arteriovenous fistula                                                 |

---

**eTable 3 | Percentage of patients who reported that nothing about care could be better according to patient and centre characteristics**

| Characteristic                                            | Excellent rating<br>N (%) | Other rating<br>N (%) | Unadjusted<br>odds ratio | Clustering and<br>case-mix<br>adjusted odds<br>ratio |
|-----------------------------------------------------------|---------------------------|-----------------------|--------------------------|------------------------------------------------------|
| Age                                                       |                           |                       |                          |                                                      |
| 18-49 years                                               | 91 (19.6)                 | 293 (31.1)            | 1.00 (reference)         | 1.00                                                 |
| 50-59 years                                               | 79 (17.0)                 | 205 (21.8)            | 1.24 (0.87-1.76)         | 1.14 (0.76-1.71)                                     |
| 59-69 years                                               | 112 (24.1)                | 208 (22.1)            | 1.73 (1.25-2.41)         | 1.40 (0.94-2.10)                                     |
| ≥70 years                                                 | 182 (39.2)                | 235 (25.0)            | 2.49 (1.84-3.38)         | 2.20 (1.47-3.31)                                     |
| Male gender                                               | 232 (47.7)                | 431 (43.5)            | 1.19 (0.95-1.48)         | 1.29 (0.97-1.72)                                     |
| Highest school education                                  |                           |                       |                          |                                                      |
| ≤5 years                                                  | 176 (40.3)                | 334 (36.1)            | 1.20 (0.95-1.51)         | 1.17 (0.87-1.57)                                     |
| >5 years                                                  | 261 (59.7)                | 592 (63.9)            | 1.00 (reference)         | 1.00                                                 |
| Occupational status                                       |                           |                       |                          |                                                      |
| Employed                                                  | 65 (13.7)                 | 181 (18.6)            | 0.70 (0.51-0.95)         | 0.86 (0.57-1.30)                                     |
| Unemployed or pension                                     | 409 (86.3)                | 792 (81.4)            | 1.00                     | 1.00                                                 |
| Married                                                   | 289 (59.5)                | 583 (58.8)            | 1.03 (0.82-1.28)         | 1.19 (0.90-1.58)                                     |
| Distance of housing from dialysis unit                    |                           |                       |                          |                                                      |
| <20 kilometres                                            | 302 (64.5)                | 695 (71.4)            | 1.00                     | 1.00                                                 |
| >20 kilometres                                            | 166 (35.5)                | 279 (28.6)            | 1.37 (1.08-1.73)         | 1.39 (1.04-1.85)                                     |
| Waiting list for kidney transplant                        | 66 (13.6)                 | 170 (17.2)            | 0.76 (0.56-1.03)         | 1.11 (0.75-1.65)                                     |
| Comorbid conditions                                       |                           |                       |                          |                                                      |
| Diabetes mellitus                                         | 122 (26.1)                | 226 (23.7)            | 1.13 (0.88-1.46)         | 1.24 (0.67-2.30)                                     |
| Prior cardiovascular event                                | 110 (22.6)                | 213 (21.5)            | 1.07 (0.82-1.39)         | 0.94 (0.67-1.31)                                     |
| Center for Epidemiological Studies-Depression Scale score |                           |                       |                          |                                                      |
| <18                                                       | 243 (54.1)                | 448 (49.0)            | 1.00 (reference)         | 1.00 (reference)                                     |
| ≥18                                                       | 206 (45.9)                | 467 (51.0)            | 0.81 (0.65-1.02)         | 0.81 (0.62-1.06)                                     |
| Dialysis adequacy, <i>single pool</i><br><i>Kt/V</i>      |                           |                       |                          |                                                      |
| <1.4                                                      | 94 (19.7)                 | 202 (20.8)            | 1.00 (reference)         | 1.00                                                 |
| ≥1.4                                                      | 384 (80.3)                | 769 (79.2)            | 1.07 (0.82-1.41)         | 1.18 (0.82-1.69)                                     |
| Serum phosphorus, mmol/l                                  |                           |                       |                          |                                                      |
| <1.45                                                     | 258 (53.4)                | 510 (52.0)            | 1.00 (reference)         | 1.00                                                 |
| ≥1.45                                                     | 225 (46.6)                | 471 (48.0)            | 0.94 (0.76-1.17)         | 1.05 (0.79-1.39)                                     |
| Haemoglobin, g/l                                          |                           |                       |                          |                                                      |
| <110                                                      | 229 (47.3)                | 530 (53.8)            | 1.00 (reference)         | 1.00                                                 |
| ≥110                                                      | 255 (52.7)                | 455 (46.2)            | 1.30 (1.04-1.61)         | 1.27 (0.96-1.66)                                     |
| Albumin, g/dl                                             |                           |                       |                          |                                                      |
| <3.8                                                      | 161 (33.5)                | 316 (32.5)            | 1.00 (reference)         | 1.00                                                 |
| 3.8-4.0                                                   | 145 (30.2)                | 281 (28.9)            | 1.01 (0.77-1.33)         | 0.91 (0.65-1.28)                                     |
| ≥4.1                                                      | 175 (36.4)                | 374 (38.5)            | 0.92 (0.71-1.19)         | 0.81 (0.57-1.15)                                     |
| Systolic blood pressure, mmHg                             |                           |                       |                          |                                                      |
| ≤120                                                      | 156 (32.5)                | 300 (31.0)            | 1.00 (reference)         | 1.00                                                 |
| 121-140                                                   | 193 (40.2)                | 373 (38.5)            | 1.00 (0.77-1.29)         | 0.98 (0.71-1.36)                                     |
| ≥140                                                      | 131 (27.3)                | 296 (30.6)            | 0.85 (0.64-1.13)         | 0.88 (0.62-1.26)                                     |
| Country                                                   |                           |                       |                          |                                                      |
| Italy                                                     | -                         | -                     | -                        | -                                                    |
| Portugal                                                  | 7 (1.4)                   | 27 (2.7)              | 0.69 (0.29-1.61)         | -                                                    |
| Argentina                                                 | 148 (30.4)                | 392 (39.6)            | 1.00 (reference)         | -                                                    |
| Hungary                                                   | 188 (38.7)                | 364 (36.7)            | 1.37 (1.06-1.77)         | -                                                    |
| Poland                                                    | 143 (29.4)                | 208 (21.0)            | 1.82 (1.37-2.42)         | -                                                    |

Clustering and case-mix adjusted model controlled for age, gender, education level, occupational status, marital status, distance from dialysis centre, activity on transplant waiting list, comorbid conditions (diabetes, hypertension, cardiovascular event) depression score, cause of end-stage kidney disease, duration of dialysis per session and dialysis dose, dialysis adequacy (Kt/V), serum values (haemoglobin; phosphorus) and country.

**eTable 4 | Percentage of patients who would recommend their dialysis center to a friend or relative who needed dialysis care according to patient and center characteristics**

| Characteristic                                            | Excellent rating<br>N (%) | Other rating<br>N (%) | Unadjusted<br>odds ratio | Clustering and<br>case-mix<br>adjusted odds<br>ratio |
|-----------------------------------------------------------|---------------------------|-----------------------|--------------------------|------------------------------------------------------|
| Age                                                       |                           |                       |                          |                                                      |
| 18-49 years                                               | 216 (23.4)                | 170 (34.8)            | 1.00                     | 1.00                                                 |
| 50-59 years                                               | 191 (20.7)                | 96 (19.5)             | 1.57 (1.14-2.15)         | 1.34 (0.93-1.94)                                     |
| 59-69 years                                               | 222 (24.1)                | 99 (20.2)             | 1.76 (1.29-2.41)         | 1.36 (0.93-1.99)                                     |
| ≥70 years                                                 | 294 (31.8)                | 124 (25.4)            | 1.87 (1.40-2.50)         | 1.84 (1.24-2.74)                                     |
| Male                                                      | 438 (45.2)                | 229 (44.5)            | 1.03 (0.83-1.28)         | 0.97 (0.73-1.28)                                     |
| Highest school education                                  |                           |                       |                          |                                                      |
| ≤5 years                                                  | 363 (40.6)                | 151 (31.7)            | 1.47 (1.16-1.86)         | 1.15 (0.86-1.54)                                     |
| >5 years                                                  | 532 (59.4)                | 325 (68.3)            | 1.00                     | 1.00                                                 |
| Occupational status                                       |                           |                       |                          |                                                      |
| Employed                                                  | 155 (16.3)                | 90 (17.9)             | 0.89 (0.67-1.19)         | 1.17 (0.81-1.68)                                     |
| Unemployed or pension                                     | 796 (83.7)                | 413 (82.1)            | 1.00                     | 1.00                                                 |
| Married                                                   | 581 (60.0)                | 299 (58.1)            |                          | 1.06 (0.81-1.39)                                     |
| Distance of housing from dialysis unit                    |                           |                       |                          |                                                      |
| <20 kilometres                                            | 633 (66.8)                | 370 (73.6)            | 1.00                     | 1.00                                                 |
| >20 kilometres                                            | 314 (33.2)                | 133 (26.4)            | 1.38 (1.09-1.75)         | 1.37 (1.03-1.83)                                     |
| Waiting list for kidney transplant                        | 152 (15.7)                | 86 (16.7)             | 0.93 (0.70-1.24)         | 1.01 (0.70-1.45)                                     |
| Comorbid conditions                                       |                           |                       |                          |                                                      |
| Diabetes mellitus                                         | 240 (25.8)                | 112 (22.5)            | 1.20 (0.93-1.55)         | 1.52 (0.78-2.94)                                     |
| Prior cardiovascular event                                | 234 (24.2)                | 92 (17.9)             | 1.46 (1.12-1.92)         | 1.21 (0.85-1.71)                                     |
| Center for Epidemiological Studies-Depression Scale score |                           |                       |                          |                                                      |
| <18                                                       | 475 (53.1)                | 214 (45.2)            | 1.00                     | 1.00                                                 |
| ≥18                                                       | 420 (46.9)                | 260 (54.9)            | 0.73 (0.58-0.91)         | 0.67 (0.51-0.87)                                     |
| Dialysis adequacy, <i>single pool Kt/V</i>                |                           |                       |                          |                                                      |
| <1.4                                                      | 181 (19.13)               | 114 (22.4)            | 1.00                     | 1.00                                                 |
| ≥1.4                                                      | 765 (80.9)                | 395 (77.6)            | 1.22 (0.94-1.59)         | 1.11 (0.79-1.56)                                     |
| Serum phosphorus, mmol/l                                  |                           |                       |                          |                                                      |
| <1.45                                                     | 532 (55.4)                | 242 (47.5)            | 1.00                     | 1.00                                                 |
| ≥1.45                                                     | 429 (44.6)                | 267 (52.5)            | 0.73 (0.59-0.91)         | 1.09 (0.83-1.43)                                     |
| Haemoglobin, g/l                                          |                           |                       |                          |                                                      |
| <110                                                      | 485 (50.4)                | 276 (53.8)            | 1.00                     | 1.00                                                 |
| ≥110                                                      | 477 (59.6)                | 237 (46.2)            | 1.15 (0.92-1.42)         | 0.95 (0.73-1.24)                                     |
| Albumin, g/dl                                             |                           |                       |                          |                                                      |
| <3.8                                                      | 294 (30.9)                | 186 (36.7)            | 1.00                     | 1.00                                                 |
| 3.8-4.0                                                   | 287 (30.2)                | 140 (27.6)            | 1.30 (0.99-1.70)         | 1.29 (0.93-1.80)                                     |
| ≥4.1                                                      | 370 (38.9)                | 181 (35.7)            | 1.29 (1.00-1.67)         | 1.00 (0.70-1.42)                                     |
| Systolic blood pressure, mmHg                             |                           |                       |                          |                                                      |
| ≤120                                                      | 295 (31.2)                | 167 (32.8)            | 1.00                     | 1.00                                                 |
| 121-140                                                   | 381 (40.2)                | 183 (36.0)            | 1.18 (0.91-1.53)         | 0.81 (0.59-1.11)                                     |
| ≥140                                                      | 271 (28.6)                | 159 (31.2)            | 0.96 (0.73-1.27)         | 0.70 (0.50-0.99)                                     |
| Country                                                   |                           |                       |                          |                                                      |
| Italy                                                     | -                         | -                     | -                        | -                                                    |
| Portugal                                                  | 36 (3.7)                  | 1 (0.2)               | 28.23 (3.84-207.39)      | -                                                    |
| Argentina                                                 | 306 (31.6)                | 240 (46.6)            | 1.00                     | -                                                    |
| Hungary                                                   | 412 (42.5)                | 136 (26.4)            | 2.38 (1.84-3.07)         | -                                                    |
| Poland                                                    | 215 (22.2)                | 138 (26.8)            | 1.22 (0.93-1.60)         | -                                                    |

Clustering and case-mix adjusted model controlled for age, gender, education level, occupational status, marital status, distance from dialysis centre, activity on transplant waiting list, comorbid conditions (diabetes, hypertension, cardiovascular event) depression score, cause of end-stage kidney disease, duration of dialysis per session and dialysis dose, dialysis adequacy (Kt/V), serum values (haemoglobin; phosphorus) and country.



**Medical committee who participated to the study contributing to enrolment of patients**

D. Rubio, W. Labonia, M Prado, A. Vinockur, R. Papparone, C. Mato Mira, A. Peñalba, M. Gravielle, E. Mojico, M. Vargas, S. Tirado, M. Paz, G. Rodriguez, L. López, R. Beistegui, C. Bonelli, M. Arias, G. Coira, D. Florio, L. León, O. Hermida, S. Kapnik, K. García, J. De Francesco, H. Altman, F. Cravzoff, S. Mandri, K. Albert, M. Kassai, E. Kiss, D. Kosa, A. Orosz, J. Redl, G. Rozsahegyi, E. Varga, Zs. Vezekenyi, E. Zajko, A. Bereczki, L. Czikos, A. Kuti, A. Mike, K. Steiner, A. Takacs, K. Tolnai, A. Toth, I. Ven, R. Mogyorosi, E. Ligeti, N. Dambrosio, F. Dagostino, M.L. Sambati, G. Giannoccaro, V. Greco, R. Di Toro Mammarella, A. Flammini, E. Boccia, D. Di Franco, P. Steri, A. M. Murgo, M. Fici, S. La Rosa, G. Montalto, M. Falco, F. Grisafi, S. Pagano, S. Amarù, D. Rallo, A. Conticello, G. Martucci, N. Sanfilippo, L. Leonardo, V. M. Liguigli, G. Matera, C. Saturno, V. Origlia, G. Paparella, A. D'Angelo, N. Falsitta, G. De Leo, S. Maldera, C. Riccardi, F. Pedone, L. Moscardelli, M. Mantuano, A. Lupo, P.G. Pellegrino, R. Antinoro, S. Cantarella, G. Randazzo, G. Marino, M. Meconizzi, A. Maniscalco, C. Donatelli, F. Torsello; M. Drobisz, T. Gregorczyk, G. Wyrwicz, W. Dżugan, J. Ostrowski, W. Załuska, E. Bocheńska- Nowacka, A. Jaroszyński, J. Drabik, M. Birecka, J. Śliwarska- Strońska, T. Gauda, St. Dzimira, P. Rutkowski; J. Lopes, J.A. Lopes, M. Leal, M. Raimundol, J. Gabás, M. Pimato, P. Berti, L. Goro

peer review only



STROBE Statement—Checklist of items that should be included in reports of *cross-sectional studies*

|                              | Item No | Recommendation                                                                                                                                                                                    | Page reference    |
|------------------------------|---------|---------------------------------------------------------------------------------------------------------------------------------------------------------------------------------------------------|-------------------|
| <b>Title and abstract</b>    | 1       | (a) Indicate the study's design with a commonly used term in the title or the abstract                                                                                                            | 1                 |
|                              |         | (b) Provide in the abstract an informative and balanced summary of what was done and what was found                                                                                               | 2                 |
| <b>Introduction</b>          |         |                                                                                                                                                                                                   |                   |
| Background/rationale         | 2       | Explain the scientific background and rationale for the investigation being reported                                                                                                              | 4                 |
| Objectives                   | 3       | State specific objectives, including any prespecified hypotheses                                                                                                                                  | 5                 |
| <b>Methods</b>               |         |                                                                                                                                                                                                   |                   |
| Study design                 | 4       | Present key elements of study design early in the paper                                                                                                                                           | 5-7               |
| Setting                      | 5       | Describe the setting, locations, and relevant dates, including periods of recruitment, exposure, follow-up, and data collection                                                                   | 5-7               |
| Participants                 | 6       | (a) Give the eligibility criteria, and the sources and methods of selection of participants                                                                                                       | 5-6               |
| Variables                    | 7       | Clearly define all outcomes, exposures, predictors, potential confounders, and effect modifiers. Give diagnostic criteria, if applicable                                                          | 6-7               |
| Data sources/<br>measurement | 8*      | For each variable of interest, give sources of data and details of methods of assessment (measurement). Describe comparability of assessment methods if there is more than one group              | 6-7               |
| Bias                         | 9       | Describe any efforts to address potential sources of bias                                                                                                                                         | 7                 |
| Study size                   | 10      | Explain how the study size was arrived at                                                                                                                                                         | 5                 |
| Quantitative variables       | 11      | Explain how quantitative variables were handled in the analyses. If applicable, describe which groupings were chosen and why                                                                      | 6-7               |
| Statistical methods          | 12      | (a) Describe all statistical methods, including those used to control for confounding                                                                                                             | 7                 |
|                              |         | (b) Describe any methods used to examine subgroups and interactions                                                                                                                               | 7                 |
|                              |         | (c) Explain how missing data were addressed                                                                                                                                                       | Not done          |
|                              |         | (d) If applicable, describe analytical methods taking account of sampling strategy                                                                                                                | 5-6               |
|                              |         | (e) Describe any sensitivity analyses                                                                                                                                                             | None              |
| <b>Results</b>               |         |                                                                                                                                                                                                   |                   |
| Participants                 | 13*     | (a) Report numbers of individuals at each stage of study—eg numbers potentially eligible, examined for eligibility, confirmed eligible, included in the study, completing follow-up, and analysed | p 5, 8<br>Table 1 |
|                              |         | (b) Give reasons for non-participation at each stage                                                                                                                                              | 5, 8              |
|                              |         | (c) Consider use of a flow diagram                                                                                                                                                                | Table provided    |
| Descriptive data             | 14*     | (a) Give characteristics of study participants (eg demographic, clinical, social) and information on exposures and potential confounders                                                          | Table 1           |
|                              |         | (b) Indicate number of participants with missing data for each variable of interest                                                                                                               | eTable 1          |
| Outcome data                 | 15*     | Report numbers of outcome events or summary measures                                                                                                                                              | eTable 1          |

|                          | Item No | Recommendation                                                                                                                                                                                               | Page reference              |
|--------------------------|---------|--------------------------------------------------------------------------------------------------------------------------------------------------------------------------------------------------------------|-----------------------------|
| Main results             | 16      | (a) Give unadjusted estimates and, if applicable, confounder-adjusted estimates and their precision (eg, 95% confidence interval). Make clear which confounders were adjusted for and why they were included | Table 2, eTable 3, eTable 4 |
|                          |         | (b) Report category boundaries when continuous variables were categorized                                                                                                                                    | Throughout                  |
|                          |         | (c) If relevant, consider translating estimates of relative risk into absolute risk for a meaningful time period                                                                                             | Not applicable              |
| Other analyses           | 17      | Report other analyses done—eg analyses of subgroups and interactions, and sensitivity analyses                                                                                                               | Not done                    |
| <b>Discussion</b>        |         |                                                                                                                                                                                                              |                             |
| Key results              | 18      | Summarise key results with reference to study objectives                                                                                                                                                     | 10-11                       |
| Limitations              | 19      | Discuss limitations of the study, taking into account sources of potential bias or imprecision. Discuss both direction and magnitude of any potential bias                                                   | 13                          |
| Interpretation           | 20      | Give a cautious overall interpretation of results considering objectives, limitations, multiplicity of analyses, results from similar studies, and other relevant evidence                                   | 10-13                       |
| Generalisability         | 21      | Discuss the generalisability (external validity) of the study results                                                                                                                                        | 13                          |
| <b>Other information</b> |         |                                                                                                                                                                                                              |                             |
| Funding                  | 22      | Give the source of funding and the role of the funders for the present study and, if applicable, for the original study on which the present article is based                                                | 15                          |

\*Give information separately for exposed and unexposed groups.

**Note:** An Explanation and Elaboration article discusses each checklist item and gives methodological background and published examples of transparent reporting. The STROBE checklist is best used in conjunction with this article (freely available on the Web sites of PLoS Medicine at <http://www.plosmedicine.org/>, Annals of Internal Medicine at <http://www.annals.org/>, and Epidemiology at <http://www.epidem.com/>). Information on the STROBE Initiative is available at [www.strobe-statement.org](http://www.strobe-statement.org).

# BMJ Open

## Patient satisfaction with in-centre haemodialysis care: An international survey

|                                 |                                                                                                                                                                                                                                                                                                                                                                                                                                                                                                                                                                                                                                                                                                                                                                                                                                                                                                                                                                                                                                                                                                                                                                                                                                                                                                                                                                                                                                                             |
|---------------------------------|-------------------------------------------------------------------------------------------------------------------------------------------------------------------------------------------------------------------------------------------------------------------------------------------------------------------------------------------------------------------------------------------------------------------------------------------------------------------------------------------------------------------------------------------------------------------------------------------------------------------------------------------------------------------------------------------------------------------------------------------------------------------------------------------------------------------------------------------------------------------------------------------------------------------------------------------------------------------------------------------------------------------------------------------------------------------------------------------------------------------------------------------------------------------------------------------------------------------------------------------------------------------------------------------------------------------------------------------------------------------------------------------------------------------------------------------------------------|
| Journal:                        | <i>BMJ Open</i>                                                                                                                                                                                                                                                                                                                                                                                                                                                                                                                                                                                                                                                                                                                                                                                                                                                                                                                                                                                                                                                                                                                                                                                                                                                                                                                                                                                                                                             |
| Manuscript ID:                  | bmjopen-2014-005020.R1                                                                                                                                                                                                                                                                                                                                                                                                                                                                                                                                                                                                                                                                                                                                                                                                                                                                                                                                                                                                                                                                                                                                                                                                                                                                                                                                                                                                                                      |
| Article Type:                   | Research                                                                                                                                                                                                                                                                                                                                                                                                                                                                                                                                                                                                                                                                                                                                                                                                                                                                                                                                                                                                                                                                                                                                                                                                                                                                                                                                                                                                                                                    |
| Date Submitted by the Author:   | 28-Apr-2014                                                                                                                                                                                                                                                                                                                                                                                                                                                                                                                                                                                                                                                                                                                                                                                                                                                                                                                                                                                                                                                                                                                                                                                                                                                                                                                                                                                                                                                 |
| Complete List of Authors:       | Palmer, Suetonia; University of Otago, Department of Medicine<br>De Berardis, Giorgia ; Consorzio Mario Negri Sud, Clinical Pharmacology and Epidemiology<br>Craig, Jonathan; University of Sydney, Sydney School of Public Health<br>Tong, Allison; The University of Sydney, Sydney School of Public Health<br>Tonelli, Marcello; University of Alberta,<br>Pellegrini, Fabio; Consorzio Mario Negri Sud, Clinical Pharmacology and Epidemiology<br>Ruospo, Marinella; Diaverum Renal Services Group,, Medical Scientific Office<br>Hegbrant, Jorgen; Diaverum Renal Services Group,, Medical Scientific Office<br>Wollheim, Charlotta; Diaverum Renal Services Group,, Medical Scientific Office<br>Celia, Eduardo; Diaverum Renal Services Group,, Medical Scientific Office<br>Gelfman, Ruben; Diaverum Renal Services Group,, Medical Scientific Office<br>Ferrari, Juan Nin; Diaverum Renal Services Group,, Medical Scientific Office<br>Torok, Marietta; Diaverum Renal Services Group,, Medical Scientific Office<br>Murgo, Marco; Diaverum Renal Services Group,, Medical Scientific Office<br>Leal, Miguel; Diaverum Renal Services Group,, Medical Scientific Office<br>Bednarek-Skublewska, Anna; Diaverum Renal Services Group,, Medical Scientific Office<br>Dulawa, Jan; Diaverum Renal Services Group,, Medical Scientific Office<br>Strippoli, Giovanni; Consorzio Mario Negri Sud, Department of Clinical Pharmacology and Epidemiology |
| <b>Primary Subject Heading</b>: | Patient-centred medicine                                                                                                                                                                                                                                                                                                                                                                                                                                                                                                                                                                                                                                                                                                                                                                                                                                                                                                                                                                                                                                                                                                                                                                                                                                                                                                                                                                                                                                    |
| Secondary Subject Heading:      | Renal medicine                                                                                                                                                                                                                                                                                                                                                                                                                                                                                                                                                                                                                                                                                                                                                                                                                                                                                                                                                                                                                                                                                                                                                                                                                                                                                                                                                                                                                                              |
| Keywords:                       | Dialysis < NEPHROLOGY, Quality in health care < HEALTH SERVICES ADMINISTRATION & MANAGEMENT, Chronic renal failure < NEPHROLOGY                                                                                                                                                                                                                                                                                                                                                                                                                                                                                                                                                                                                                                                                                                                                                                                                                                                                                                                                                                                                                                                                                                                                                                                                                                                                                                                             |
|                                 |                                                                                                                                                                                                                                                                                                                                                                                                                                                                                                                                                                                                                                                                                                                                                                                                                                                                                                                                                                                                                                                                                                                                                                                                                                                                                                                                                                                                                                                             |

# Patient satisfaction with in-centre haemodialysis care: An international survey

Suetonia C. Palmer, MBChB PhD,<sup>1</sup> Giorgia de Berardis, PhD,<sup>2</sup> Jonathan C. Craig, MBChB DCH MM PhD,<sup>3</sup> Allison Tong, PhD,<sup>3</sup> Marcello Tonelli, MD PhD,<sup>4</sup> Fabio Pellegrini, MSc<sup>2,5</sup> Marinella Ruospo, MSc<sup>6</sup> Jörgen Hegbrant, MD PhD,<sup>6</sup> Charlotta Wollheim, MSc,<sup>6</sup> Eduardo Celia, MD,<sup>6</sup> Ruben Gelfman, MD,<sup>6</sup> Juan Nin Ferrari, MD,<sup>6</sup> Marietta Török, MD,<sup>6</sup> Marco Murgo, MD,<sup>6</sup> Miguel Leal, MD,<sup>6</sup> Anna Bednarek-Skublewska, MD,<sup>6</sup> Jan Dulawa, MD,<sup>6</sup> and Giovanni F.M. Strippoli, MD MM MPH PhD<sup>2,3,6,7</sup>

<sup>1</sup>Department of Medicine, University of Otago Christchurch, Christchurch, New Zealand

<sup>2</sup>Consorzio Mario Negri Sud, S. Maria Imbaro, Italy

<sup>3</sup>School of Public Health, University of Sydney, Sydney, Australia

<sup>4</sup>Division of Nephrology and Immunology, University of Alberta, Edmonton, Canada

<sup>5</sup>Scientific Institute Casa Sollievo della Sofferenza, Italy

<sup>6</sup>Diaverum Scientific Medical Office, Lund, Sweden

<sup>7</sup>Department of Emergency and Organ Transplantation, University of Bari, Italy

## Corresponding author and address for reprints:

Giovanni FM Strippoli,  
Department of Clinical Pharmacology and Epidemiology,  
Consorzio Mario Negri Sud,  
Via Nazionale 8/a, 66030,  
S Maria Imbaro,  
Italy ([gfmstrippoli@gmail.com](mailto:gfmstrippoli@gmail.com))  
Phone: +39 3358756828  
Facsimile: +39 0805096087

**Word count (for abstract):** 250

**Word count (for text):** 3454

**Running title** Patient satisfaction with haemodialysis

**Key words** Patient satisfaction, chronic dialysis, chronic kidney failure

**Abstract****Objectives**

To evaluate patient experiences of specific aspects of haemodialysis care across several countries

**Design**

Cross-sectional survey using the Choices for Healthy Outcomes in Caring for End-Stage Renal Disease (CHOICE) questionnaire

**Setting**

Haemodialysis clinics within a single provider in Europe and South America

**Participants**

2748 adults treated in haemodialysis

**Primary and secondary outcomes**

The primary outcome was patient satisfaction with overall care. Secondary outcomes included patient experiences of individual aspects of dialysis care

**Results**

2145 (78.1%) adults responded to the questionnaire. Fewer than half (46.5% [95% confidence interval, 44.5 to 48.6]) rated their overall care as excellent. Global perceptions of care were uninfluenced by most respondent characteristics except age and depressive symptoms; older respondents were less critical of their care (adjusted odds ratio for excellent rating 1.44 [1.01-2.04]) and those with depressive symptoms were less satisfied (0.56 [0.44 to 0.71]). Aspects of care that respondents most frequently ranked as excellent were staff attention to dialysis vascular access (54 [52-56]%), caring of nurses (53 [51-55]%), staff responsiveness to pain or discomfort (51 [49-53]%), caring, helpfulness and sensitivity of dialysis staff (50 [48-52]%), and ease of reaching dialysis staff by telephone (48 [46-50]%). The aspects of care least frequently ranked as excellent were information provided when choosing a dialysis modality (23 [21-25]%), ease of seeing a social worker (28 [24-

1  
2  
3 32]), information provided about dialysis (34 [32-36]%), accuracy of information from nephrologist  
4  
5 (for example, about prognosis or likelihood of a kidney transplant) (37 [35-39]%), and accuracy of  
6  
7 nephrologists' instructions (39 [36-41]%).  
8  
9

## 10 **Conclusion**

11  
12 Haemodialysis patients are least satisfied with the complex aspects of care. Patients' expectations  
13  
14 for accurate information, prognosis, the likelihood of kidney transplantation and their options when  
15  
16 choosing dialysis treatment need to be considered when planning healthcare research and  
17  
18 healthcare practices.  
19  
20

## 21 **Article summary**

### 22 **Strengths and limitations of this study**

- 23  
24  
25  
26 • The study is based on a large multinational survey of patients with chronic kidney failure  
27  
28 needing treatment with long-term dialysis. There were no specific exclusions other than  
29  
30 refusal or inability to complete the survey questions  
31  
32
- 33  
34 • This study adds knowledge across a large cohort of the specific aspects of dialysis care that  
35  
36 fewer patients find satisfactory  
37  
38
- 39  
40 • The limitations were the lack of data about the health service characteristics that might have  
41  
42 contributed to patient experiences as well as linkages to patient relevant outcomes  
43  
44  
45  
46  
47  
48  
49  
50  
51  
52  
53  
54  
55  
56  
57  
58  
59  
60

## Introduction

Patients treated with haemodialysis experience mortality rates approaching 15-20% each year<sup>[1]</sup> and have profoundly impaired quality of life,<sup>[2 3]</sup> contributed to by severe symptoms of fatigue, low appetite, pain, sleep disorders, anxiety, nausea, and restless legs.<sup>[4]</sup> While interventions in haemodialysis trials and healthcare regulations have largely focused on biomarker endpoints and quantitative outcomes (mortality and cardiovascular events) to evaluate care, dialysis patients value normalization of their lives, economic efficiency in healthcare, and how their personal preferences are met, including reducing dietary and travel restrictions.<sup>[5 6]</sup> This mismatch in patient, provider and research priorities has resulted in clinical research and practice that have not improved patient-centred outcomes for dialysis patients<sup>[7-11]</sup> and consumed considerable resources.<sup>[12]</sup>

Given that patients treated with in-centre haemodialysis attend dialysis care at least three times per week for several hours each time, their experiences of dialysis care are likely to have an important impact on living with chronic illness.<sup>[3 13]</sup> By contrast, health funders have traditionally used only clinical performance indicators such as anaemia, blood pressure, nutrition, dialysis vascular access and adequacy of solute removal to evaluate and allocate reimbursement for dialysis provision.<sup>[14-17]</sup> While improving patient satisfaction with dialysis treatment has the potential to increase quality of life and improve patient-level outcomes, data to inform this objective are scarce.<sup>[18 19]</sup> Studies indicate that healthcare delivery in the latter stages of chronic kidney disease such as predialysis nephrology care, multidisciplinary management, psycho-education interventions and prognosis communication may improve quantitative health outcomes in the dialysis setting, but there is little information on the effects of these strategies on outcomes relevant to patients, that include symptoms, function and quality of life.<sup>[20-24]</sup> In addition, evaluations of patient experiences of haemodialysis care are available and can shape our knowledge about what patients value, but in existing studies smaller population sizes within single countries limit the power to adjust for case-mix<sup>[19]</sup> and perceptions of care are limited to global scores which may restrict our understanding of

1  
2  
3 the contributions of specific, and potentially modifiable, aspects of care on overall patient  
4  
5 experience.[\[18\]](#)  
6  
7

8 Greater understanding of how patients experience all facets of long-term dialysis is needed to  
9  
10 inform the design of large-scale trials which evaluate targeted healthcare strategies to improve the  
11  
12 lives of dialysis patients in ways they value. Accordingly, we aimed, for the first time, to describe  
13  
14 patient satisfaction with haemodialysis care in a large multi-national cohort to assess patients'  
15  
16 experiences of haemodialysis care while accounting for clinical and demographic characteristics.  
17  
18

## 19 20 **Methods**

### 21 22 **Participants**

23  
24 We used data from Diaverum, a network which provides renal care including long-term in-centre  
25  
26 haemodialysis treatment for more than 20,000 patients in Europe and South America and surveys  
27  
28 patients at least annually about their satisfaction with care. We conducted a cross-sectional analysis  
29  
30 of routinely-gathered survey data collected in 2008. We selected a convenience sample of 15% of  
31  
32 patients in the network from clinics that were willing to contribute. Data were included for selected  
33  
34 patients who were aged 18 years or older and treated with haemodialysis between January and June  
35  
36 2008 in centres located in Europe (Hungary, Italy, Poland, and Portugal) and South America  
37  
38 (Argentina). All clinical centres were managed during the study period according to the same  
39  
40 standards of care. Of the 2748 patients selected (Argentina, n=670; Hungary, n=683; Italy, n=880;  
41  
42 Poland, n=477; Portugal, n=38), 2145 (78.1%) responded and 1846 (67.2%) provided complete  
43  
44 responses to all questions. We obtained ethics approval to analyse routinely-gathered clinical data  
45  
46 from the University of Sydney Human Research Ethics Committee (project number 2013/031). The  
47  
48 study was conducted according to the requirements of the Declaration of Helsinki. The mean age  
49  
50 and gender composition of our cohort is similar to prevalent patients treated with kidney  
51  
52 replacement therapy in Europe.[\[25\]](#)  
53  
54  
55  
56  
57  
58  
59  
60



### Key measures

We collected data from patient responses to the Choices for Healthy Outcomes In Caring for End-stage kidney disease (CHOICE) questionnaire, which evaluates satisfaction with dialysis treatment (see the **eAppendix** for the full survey).<sup>[26]</sup> The CHOICE questionnaire was originally developed by Rubin and colleagues using a focus group of long-term in-centre haemodialysis and home-based peritoneal dialysis patients to identify aspects of dialysis care most important to them. The items identified were then ranked by a larger number of long-term dialysis patients to identify the top 25 items they considered extremely important. The questionnaire asks 20 questions about patients' experiences relating to these different aspects of dialysis care on a 5-point Likert scale (poor, fair, good, very good, excellent). In addition, three questions ask patients to rate the overall quality of their care (poor, fair, good, very good, excellent, or not applicable), how much about their care could be better (many things, a few things, one or two things, and nothing could be better at all), and whether they would recommend their care service to others who may need dialysis care (definitely not, probably not, not sure, probably yes, and definitely yes) (**eTable 1**). In addition, we summarized measures of key performance indicators for dialysis within each country (**eTable 2**) for the two quarters in which satisfaction data were collected and reported these as overall performance scores for each participating country.

In the present analysis, the question "How easy is it to meet the social worker when you want to?" was only included in the annual survey in Hungary and the two global questions about care "Thinking about your dialysis care overall, how much could be better?" and "Would you recommend your dialysis centre to a friend or relative who needs dialysis?" were omitted in the annual survey of Italian patients.

Surveys were provided to patients by dialysis clinical staff during routine dialysis care. Patients self-completed the questionnaires anonymously during a dialysis session and data were de-identified. We then linked survey data to concurrent demographic, clinical, and laboratory information in a

1  
2  
3 clinical database using a unique patient identifier; additional data were provided where necessary by  
4  
5 the treating physician on a standardized case report form. We used questionnaires in the patients'  
6  
7 native language after translation and linguistic validation by the MAPI Institute ([institute.com](http://www.mapi-<br/>8<br/>9<br/>10<br/>11<br/>12<br/>13<br/>14<br/>15<br/>16<br/>17<br/>18<br/>19<br/>20<br/>21<br/>22<br/>23<br/>24<br/>25<br/>26<br/>27<br/>28<br/>29<br/>30<br/>31<br/>32<br/>33<br/>34<br/>35<br/>36<br/>37<br/>38<br/>39<br/>40<br/>41<br/>42<br/>43<br/>44<br/>45<br/>46<br/>47<br/>48<br/>49<br/>50<br/>51<br/>52<br/>53<br/>54<br/>55<br/>56<br/>57<br/>58<br/>59<br/>60<br/><a href=)).

### Analysis

We considered a response to the survey as complete when interpretable answers were provided for all survey questions and partially complete when one or more answers was missing. We used chi-square tests and Mann-Whitney U tests to compare the characteristics of patients who responded to the survey with those who did not. The primary outcome of interest was the proportion of respondents who evaluated their overall care as 'excellent'. We also estimated the proportion of respondents who evaluated each separate dimension of care as 'excellent'. To account for the multilevel nature of the data (patients clustered within countries) and to control simultaneously for the possible confounding effects of the different variables, we used multivariate multilevel logistic regression models.<sup>[27 28]</sup> We constructed clustering and case-mix adjusted models that controlled for the following potential confounding variables: age, gender, education level, occupational status, marital status, distance to travel to the dialysis centre, kidney transplant waiting list status, comorbid conditions (diabetes mellitus, hypertension, cardiovascular event), depression score, cause of end-stage kidney disease, duration of dialysis per session, dialysis dose, adequacy of dialysis, and serum values of haemoglobin and phosphorus. We performed multilevel logistic regression using the SAS language macro routine Proc GLIMMIX (SAS Institute Inc., Cary, NC; Release 9.1, 2002-2003; <http://www.sas.com>).

## Results

### Characteristics of patients in the network and respondents to questionnaire

Respondents were younger and lived closer to their dialysis centre than non-respondents (**Table 1**).

Questionnaire response rates differed by country; patients in Portugal were most likely to respond to the survey (97.4%), with decreasing response rates in Argentina (81.9%), Hungary (81.4%), Poland (74.4%), and Italy (73.6%). Overall, respondents were  $61.0 \pm 15.5$  years, most were men (55.5%), 40.2% had 6 to 8 years of school education, and about half had depressive symptoms according to the Center for Epidemiological Studies-Depression (CES-D) Scale (score of 18 or above). Two-thirds of respondents were married (60.8%), most were unemployed (68.8%), and a minority had previously received a kidney transplant (6.9%).

### Survey responses

Fewer than half of respondents rated their overall care as excellent (1057/2271; 46.5% [95% confidence interval (CI), 44.5 to 48.6%]) and about three-quarters rated their care as excellent or very good (1783/2271; 78.5% [CI 76.8 to 80.2%]) (**Figure 1**). The proportion rating their overall care as excellent was lowest in Poland (13.7%), with an increasing proportion in Argentina (30.3%), Italy (61.2%), Hungary (63.5%), and Portugal (83.8%) (**eTable 1**).

**Table 2** shows the association between respondent characteristics and the proportion rating haemodialysis care as excellent. In analyses clustered by country and controlled for demographic and clinical variables, older respondents were more likely to consider care excellent (adjusted odds ratio [AOR] for those 70 years or older, 1.44 [CI, 1.01 to 2.04] compared with those aged 18 to 49 years) and those with depressive symptoms were less likely to consider that care met excellent standards (AOR, 0.56 [CI, 0.44 to 0.71]). Gender, education, marital status, comorbidity (including diabetes and cardiovascular disease) and the time spent on dialysis each week were not associated with perspectives of overall care.

1  
2  
3 **Figure 1** shows the proportion of respondents who considered that nothing about their care could  
4 be better and **eTable 3** provides responses according to clinical, demographic and treatment-based  
5 characteristics. Overall, about one-third of respondents considered that nothing about their care  
6 could be better (486/1477; 32.9% [CI, 30.6% to 35.3%]). Respondents aged 70 years or older (AOR,  
7 2.20 [CI, 1.47 to 3.31]) and those living further away from their dialysis centre (AOR, 1.39 [CI, 1.04 to  
8 1.85]) were more likely to consider that no aspect of their care required improvement. In the four  
9 countries in which this question was asked (Argentina, Hungary, Poland, and Portugal), compared  
10 with Argentina, patients in Hungary (AOR, 1.37 [CI, 1.06 to 1.77]) and Poland (AOR, 1.82 [CI, 1.37 to  
11 2.42]) were more likely to consider than nothing about their care needed to be changed.

12  
13  
14  
15  
16  
17  
18  
19  
20  
21  
22  
23 In the four countries in which the question “would you recommend your dialysis centre to a friend or  
24 relative who needed dialysis” was asked, 1022 of 1587 respondents (64.4% [CI, 62.0 to 66.7%])  
25 would definitely recommend their dialysis centre. Older respondents (AOR, 1.84 [CI, 1.24-2.74]) and  
26 those living further from their dialysis centre (AOR, 1.37 [CI, 1.03-1.83]) were more likely to  
27 recommend their dialysis centre to others for care, whereas those with depressive symptoms were  
28 less likely to recommend their care to others (AOR, 0.67 [CI, 0.51 to 0.87]) (**eTable 4**). Compared to  
29 Argentina, strong recommendations would more likely be made by respondents in Hungary (AOR  
30 2.38 [CI 1.84-3.07]) and Portugal (AOR 28.2 [CI 3.84-207.39]).

31  
32  
33  
34  
35  
36  
37  
38  
39  
40  
41  
42 The five items that respondents rated most frequently as excellent were “attention of staff to  
43 cleanliness of the dialysis vascular access site” (54% ranked as excellent), “caring and helpfulness of  
44 nurses” (53%), “response of staff to pain or discomfort” (51%), “caring, helpfulness and sensitivity of  
45 dialysis staff” (50%), and “ease of reaching staff by telephone” (48%) (**Figure 1**). The five items rated  
46 least frequently by respondents as excellent were “the amount of information when choosing  
47 dialysis modality”(23%), “the ease of seeing a social worker when needed” (28%), “amount of  
48 information from dialysis staff” (34%), “accuracy of information from nephrologist including  
49 prognosis and likelihood of getting a kidney transplant” (37%), and “accuracy of instructions from  
50  
51  
52  
53  
54  
55  
56  
57  
58  
59  
60

1  
2  
3 nephrologist" (39%). In general, the amount of caring and concern shown by staff, particularly by  
4  
5 nurses, and the ability of patients to contact dialysis staff were ranked highly, whereas the amount  
6  
7 and delivery of information about treatment choices and prognosis as well as access to social worker  
8  
9 staff and nephrologists were ranked lowest.  
10

11  
12 A composite measure of key performance indicators were similar in the included countries during  
13  
14 the recruitment period (in descending order with a higher value indicating higher performance:  
15  
16 Hungary 1535, Portugal 1551, Italy 1543, Poland 1381, and Argentina 1303) and were associated  
17  
18 with the proportion of respondents reporting excellent overall care (for each unit increase in  
19  
20 performance score, the proportion of respondents who ranked care as excellent increased by 0.21%  
21  
22 (95% CI -0.02% to 0.44%).  
23  
24

## 25 26 **Discussion**

27  
28 We report the largest study of patient satisfaction with dialysis care to date and identify specific  
29  
30 deficits in long-term dialysis care across several countries. Most respondents viewed their overall  
31  
32 dialysis care as below excellent and needing improvement. Specifically, while the majority of  
33  
34 respondents approved of the more technical aspects of dialysis treatment (attention to the  
35  
36 cleanliness of the dialysis vascular access site, caring and helpfulness of nurses and dialysis staff, and  
37  
38 attention by staff to immediate needs (pain, discomfort, sterile procedures)), a minority were  
39  
40 satisfied with the more complex and integrated components of care. These were the accuracy and  
41  
42 amount of information given by staff to patients about their dialysis treatment, prognosis and  
43  
44 making choices between peritoneal dialysis and haemodialysis in addition to support from social  
45  
46 worker staff. Older respondents were generally less critical of their haemodialysis care, while those  
47  
48 with depressive symptoms were less frequently satisfied. Other demographic and clinical features  
49  
50 did not reliably influence perceptions of overall care and country of treatment had inconsistent  
51  
52 effects on satisfaction. Better dialysis care performance scores were associated with higher overall  
53  
54 patient satisfaction.  
55  
56  
57  
58  
59  
60

1  
2  
3 Our patients' perspectives together with other similar studies from the United States[19] and The  
4  
5 Netherlands[18] emphasise that deficiencies in dialysis care are consistently found and need to be  
6  
7 considered specifically when conducting research to improve dialysis patient outcomes. This is  
8  
9 particularly relevant as existing interventions in the dialysis setting, including anaemia  
10  
11 management,[7] control of phosphorus[29] and parathyroid hormone levels,[30] dialysis dose and  
12  
13 flux,[9] and starting dialysis earlier[8] have not improved patient-wellbeing despite evaluation in  
14  
15 thousands of patients. Our respondents, consistent with the findings of others,[31-33] report  
16  
17 specifically receiving inadequate information about their illness journey and as well as their dialysis  
18  
19 treatment options. In our and other chronic diseases settings, patients report needing more  
20  
21 information about the causes and progression of their disease, disease symptoms and their impact,  
22  
23 and social and financial support.[34] [35] Patients, often due to the competing demands of daily life,  
24  
25 rely on healthcare professional to initiate discussions about care planning and not having future-  
26  
27 oriented conversations reduces patients' capacity for hope.[36] Patients perceive poor  
28  
29 communication as reflecting secrecy, misinformation and insensitivity. Subsequently, inadequate  
30  
31 information reduces the ability of patients and their families to care for themselves and induces  
32  
33 worry.[34] While education strategies increase patients' willingness to choose self-care dialysis,[23]  
34  
35 the wider effect of educational interventions in the dialysis setting that answer unmet questions  
36  
37 about disease trajectory and treatment choices with the aim of improving patient experiences of  
38  
39 end-stage kidney disease are not well understood and warrant larger-scale trials. Research in other  
40  
41 settings suggest specific interventions to improve information provision, such as training and  
42  
43 support for healthcare staff in communication and basic counselling, and overcoming barriers to  
44  
45 good communication including addressing time pressures and understaffed environments and  
46  
47 considering innovative non-written methods might be appropriate complex strategies for trials in  
48  
49 the dialysis setting.[34]

50  
51 This study indicates most patients in dialysis settings want more accurate information about their  
52  
53 prognosis, in line with experiences of other dialysis patients and those who have cancer.[36 37]  
54  
55  
56  
57  
58  
59  
60

1  
2  
3 Accurate prognostic information empowers patients;<sup>[38]</sup> when discussions about prognosis do not  
4 occur, patients and their families may (incorrectly) fear the worst. For dialysis patients in our study,  
5 the information they receive about prognosis is frequently unsatisfactory including specifically  
6 understanding their chances of receiving a kidney transplant and their survival. Physicians in other  
7 medical specialties similarly provide insufficient information about prognosis<sup>[39]</sup> and infrequently  
8 check their patients' understanding during consultations.<sup>[40]</sup> Physicians commonly find disclosing  
9 prognosis stressful and desire more training and guidance for this aspect of clinical practice.<sup>[41]</sup> Our  
10 findings suggest that meeting patients' expectations about information is an important but  
11 potentially neglected aspect of dialysis care and is consistent with data showing that patients are  
12 infrequently involved in discussions about prognosis and likelihood of transplantation.<sup>[33]</sup> The effect  
13 of increased clinician training in prognosis provision about survival and transplantation could form  
14 the basis of a testable strategy in future health services research in dialysis.

15  
16  
17  
18  
19  
20  
21  
22  
23  
24  
25  
26  
27  
28  
29  
30 The patient-centred movement in healthcare ('nothing about me without me')<sup>[42]</sup> has engendered  
31 considerable data on the issues of most importance to patients and their families to highlight the  
32 mismatch between patients' values and the outcomes routinely measured in research and clinical  
33 practice, including for patients with advanced kidney disease.<sup>[5 43]</sup> While landmark trials in  
34 nephrology over the past three decades have measured treatment effectiveness using biomarker  
35 levels and major cardiovascular events and survival, emerging data show that patients are frequently  
36 willing to forgo survival in exchange for fewer restrictions on their daily life, and prioritize  
37 collaborative research aimed at improving the way they feel, function, and survive.<sup>[5 6]</sup> In addition,  
38 contemporary studies of communication and educational strategies as well as complex healthcare  
39 service changes in dialysis have used similarly quantitative outcomes to assess treatment  
40 effectiveness, which have included urgent dialysis start, vascular access processes, and survival.<sup>[20</sup>  
41  
42  
43  
44  
45  
46  
47  
48  
49  
50  
51  
52  
53  
54  
55  
56  
57  
58  
59  
60  
61  
62  
63  
64  
65  
66  
67  
68  
69  
70  
71  
72  
73  
74  
75  
76  
77  
78  
79  
80  
81  
82  
83  
84  
85  
86  
87  
88  
89  
90  
91  
92  
93  
94  
95  
96  
97  
98  
99  
100  
101  
102  
103  
104  
105  
106  
107  
108  
109  
110  
111  
112  
113  
114  
115  
116  
117  
118  
119  
120  
121  
122  
123  
124  
125  
126  
127  
128  
129  
130  
131  
132  
133  
134  
135  
136  
137  
138  
139  
140  
141  
142  
143  
144  
145  
146  
147  
148  
149  
150  
151  
152  
153  
154  
155  
156  
157  
158  
159  
160  
161  
162  
163  
164  
165  
166  
167  
168  
169  
170  
171  
172  
173  
174  
175  
176  
177  
178  
179  
180  
181  
182  
183  
184  
185  
186  
187  
188  
189  
190  
191  
192  
193  
194  
195  
196  
197  
198  
199  
200  
201  
202  
203  
204  
205  
206  
207  
208  
209  
210  
211  
212  
213  
214  
215  
216  
217  
218  
219  
220  
221  
222  
223  
224  
225  
226  
227  
228  
229  
230  
231  
232  
233  
234  
235  
236  
237  
238  
239  
240  
241  
242  
243  
244  
245  
246  
247  
248  
249  
250  
251  
252  
253  
254  
255  
256  
257  
258  
259  
260  
261  
262  
263  
264  
265  
266  
267  
268  
269  
270  
271  
272  
273  
274  
275  
276  
277  
278  
279  
280  
281  
282  
283  
284  
285  
286  
287  
288  
289  
290  
291  
292  
293  
294  
295  
296  
297  
298  
299  
300  
301  
302  
303  
304  
305  
306  
307  
308  
309  
310  
311  
312  
313  
314  
315  
316  
317  
318  
319  
320  
321  
322  
323  
324  
325  
326  
327  
328  
329  
330  
331  
332  
333  
334  
335  
336  
337  
338  
339  
340  
341  
342  
343  
344  
345  
346  
347  
348  
349  
350  
351  
352  
353  
354  
355  
356  
357  
358  
359  
360  
361  
362  
363  
364  
365  
366  
367  
368  
369  
370  
371  
372  
373  
374  
375  
376  
377  
378  
379  
380  
381  
382  
383  
384  
385  
386  
387  
388  
389  
390  
391  
392  
393  
394  
395  
396  
397  
398  
399  
400  
401  
402  
403  
404  
405  
406  
407  
408  
409  
410  
411  
412  
413  
414  
415  
416  
417  
418  
419  
420  
421  
422  
423  
424  
425  
426  
427  
428  
429  
430  
431  
432  
433  
434  
435  
436  
437  
438  
439  
440  
441  
442  
443  
444  
445  
446  
447  
448  
449  
450  
451  
452  
453  
454  
455  
456  
457  
458  
459  
460  
461  
462  
463  
464  
465  
466  
467  
468  
469  
470  
471  
472  
473  
474  
475  
476  
477  
478  
479  
480  
481  
482  
483  
484  
485  
486  
487  
488  
489  
490  
491  
492  
493  
494  
495  
496  
497  
498  
499  
500  
501  
502  
503  
504  
505  
506  
507  
508  
509  
510  
511  
512  
513  
514  
515  
516  
517  
518  
519  
520  
521  
522  
523  
524  
525  
526  
527  
528  
529  
530  
531  
532  
533  
534  
535  
536  
537  
538  
539  
540  
541  
542  
543  
544  
545  
546  
547  
548  
549  
550  
551  
552  
553  
554  
555  
556  
557  
558  
559  
560  
561  
562  
563  
564  
565  
566  
567  
568  
569  
570  
571  
572  
573  
574  
575  
576  
577  
578  
579  
580  
581  
582  
583  
584  
585  
586  
587  
588  
589  
590  
591  
592  
593  
594  
595  
596  
597  
598  
599  
600  
601  
602  
603  
604  
605  
606  
607  
608  
609  
610  
611  
612  
613  
614  
615  
616  
617  
618  
619  
620  
621  
622  
623  
624  
625  
626  
627  
628  
629  
630  
631  
632  
633  
634  
635  
636  
637  
638  
639  
640  
641  
642  
643  
644  
645  
646  
647  
648  
649  
650  
651  
652  
653  
654  
655  
656  
657  
658  
659  
660  
661  
662  
663  
664  
665  
666  
667  
668  
669  
670  
671  
672  
673  
674  
675  
676  
677  
678  
679  
680  
681  
682  
683  
684  
685  
686  
687  
688  
689  
690  
691  
692  
693  
694  
695  
696  
697  
698  
699  
700  
701  
702  
703  
704  
705  
706  
707  
708  
709  
710  
711  
712  
713  
714  
715  
716  
717  
718  
719  
720  
721  
722  
723  
724  
725  
726  
727  
728  
729  
730  
731  
732  
733  
734  
735  
736  
737  
738  
739  
740  
741  
742  
743  
744  
745  
746  
747  
748  
749  
750  
751  
752  
753  
754  
755  
756  
757  
758  
759  
760  
761  
762  
763  
764  
765  
766  
767  
768  
769  
770  
771  
772  
773  
774  
775  
776  
777  
778  
779  
780  
781  
782  
783  
784  
785  
786  
787  
788  
789  
790  
791  
792  
793  
794  
795  
796  
797  
798  
799  
800  
801  
802  
803  
804  
805  
806  
807  
808  
809  
810  
811  
812  
813  
814  
815  
816  
817  
818  
819  
820  
821  
822  
823  
824  
825  
826  
827  
828  
829  
830  
831  
832  
833  
834  
835  
836  
837  
838  
839  
840  
841  
842  
843  
844  
845  
846  
847  
848  
849  
850  
851  
852  
853  
854  
855  
856  
857  
858  
859  
860  
861  
862  
863  
864  
865  
866  
867  
868  
869  
870  
871  
872  
873  
874  
875  
876  
877  
878  
879  
880  
881  
882  
883  
884  
885  
886  
887  
888  
889  
890  
891  
892  
893  
894  
895  
896  
897  
898  
899  
900  
901  
902  
903  
904  
905  
906  
907  
908  
909  
910  
911  
912  
913  
914  
915  
916  
917  
918  
919  
920  
921  
922  
923  
924  
925  
926  
927  
928  
929  
930  
931  
932  
933  
934  
935  
936  
937  
938  
939  
940  
941  
942  
943  
944  
945  
946  
947  
948  
949  
950  
951  
952  
953  
954  
955  
956  
957  
958  
959  
960  
961  
962  
963  
964  
965  
966  
967  
968  
969  
970  
971  
972  
973  
974  
975  
976  
977  
978  
979  
980  
981  
982  
983  
984  
985  
986  
987  
988  
989  
990  
991  
992  
993  
994  
995  
996  
997  
998  
999  
1000

The patient-centred movement in healthcare ('nothing about me without me')<sup>[42]</sup> has engendered considerable data on the issues of most importance to patients and their families to highlight the mismatch between patients' values and the outcomes routinely measured in research and clinical practice, including for patients with advanced kidney disease.<sup>[5 43]</sup> While landmark trials in nephrology over the past three decades have measured treatment effectiveness using biomarker levels and major cardiovascular events and survival, emerging data show that patients are frequently willing to forgo survival in exchange for fewer restrictions on their daily life, and prioritize collaborative research aimed at improving the way they feel, function, and survive.<sup>[5 6]</sup> In addition, contemporary studies of communication and educational strategies as well as complex healthcare service changes in dialysis have used similarly quantitative outcomes to assess treatment effectiveness, which have included urgent dialysis start, vascular access processes, and survival.<sup>[20 21 44]</sup> We suggest that, in line with patient-centred data, trials of communication or education for dialysis patients might consider aspects of quality of life valued by patients as key outcomes for assessing effectiveness.

1  
2  
3 Notably, patient satisfaction was largely unrelated to most clinical or demographic patient  
4 characteristics despite a large sample size and similar to other studies in the US and The  
5 Netherlands, suggesting that lower satisfaction of many aspects of dialysis care is a global patient  
6 experience. Older patients in this study rated their overall care more highly, consistent with a recent  
7 study of patient perceptions of dialysis care in The Netherlands,[18] and of studies of patient  
8 satisfaction across health services more generally,[45 46] despite evidence that older patients may  
9 actually receive lower quality care.[47] In contrast, depressive symptoms markedly reduced  
10 satisfaction in this study, (even when controlling for markers of health status and comorbidity);  
11 similar findings have been reported in other settings.[48] Those with depressive symptoms  
12 voluntarily ration the time they have with medical staff, which may in turn impair patient-clinician  
13 communication and serve to decrease their satisfaction with care overall.[48] Notably, in other  
14 chronic disease settings, patient satisfaction is increased in association with better patient-clinician  
15 interaction and support for patient self-management[49] and high levels of patient satisfaction for  
16 interpersonal skills, technical quality and access to care can be present in chronic illness settings  
17 such as diabetes mellitus and rheumatoid arthritis.[50]

### 36 **Limitations of the study**

37  
38 Although we provide considerable satisfaction data for dialysis patients in several countries, our  
39 analysis should be interpreted in light of the study limitations. First, we did not evaluate in detail the  
40 influence of healthcare systems in which the dialysis clinics were situated (including features such as  
41 staffing-levels[51] or number of beds[52]) on patient satisfaction, although we did find an  
42 association between overall satisfaction and global clinical performance. While interpersonal  
43 relations with healthcare workers are the most frequently mentioned by patients when asked to rate  
44 their care, contextual factors relating to conditions of medical services are also described commonly  
45 by patients and often lead to negative comments about healthcare.[53] Second, we took a  
46 quantitative approach to assessing patients' perceptions, which may be suboptimal for  
47 understanding the full range of feelings, values and experiences of receiving dialysis care. In  
48  
49  
50  
51  
52  
53  
54  
55  
56  
57  
58  
59  
60



1  
2  
3 addition, satisfaction and dissatisfaction may not simply be alternative ends of a single spectrum of  
4  
5 perception and may in fact exist side-by-side within a patient experience of care.<sup>[54]</sup> Third, we did  
6  
7 not capture satisfaction with a specific healthcare event and surveyed patients who had been  
8  
9 treated with dialysis for 3 years on average. The potential lag between pivotal patient experiences  
10  
11 and the survey may have introduced recall bias.<sup>[55]</sup> Fourth, we did not capture longitudinal data to  
12  
13 determine any association between perceptions of care and health-related behaviour and outcomes  
14  
15 including healthcare utilization, quality of life, or survival. Finally, the findings in this study may not  
16  
17 be applicable to other dialysis settings including peritoneal dialysis or home-based haemodialysis  
18  
19 care and regional settings outside our survey countries including many USA, European and United  
20  
21 Kingdom dialysis settings. In addition, the study survey predates more widespread use of  
22  
23 haemodiafiltration which may be associated with greater haemodynamic stability during dialysis  
24  
25 therapy and different levels of patient satisfaction.  
26  
27

### 28 29 30 **Implications of the study**

31  
32 As measures of patient experience are distinctive indicators of health care quality,<sup>[55]</sup> our analysis  
33  
34 suggests several strategies might improve care for patients in the later stages of chronic kidney  
35  
36 disease. First, patients need better information about their choices of treatment for end-stage  
37  
38 kidney disease including dialysis modalities. A recent systematic review suggests this is optimally  
39  
40 provided when the glomerular filtration rate falls below 30 ml/min per 1.73 m<sup>2</sup> and well in advance  
41  
42 of preparations for dialysis vascular access.<sup>[31]</sup> Second, formal care strategies that provide patients  
43  
44 with information about prognosis and the impact of end-stage kidney disease and its treatments on  
45  
46 their life earlier in the course of kidney disease need to be developed and assessed. Current  
47  
48 practices for assessing and discussing prognosis are manifestly inadequate<sup>[36]</sup> and our present  
49  
50 reliance on individual physicians to initiate such discussions is not meeting the needs of our patients.  
51  
52 Third, better delivery of information about dialysis from both nephrologists and dialysis staff is  
53  
54 expected by patients and greater understanding of the information that patients need and optimal  
55  
56 mode(s) of delivery may improve care.  
57  
58  
59  
60

1  
2  
3  
4  
5  
6  
7  
8  
9  
10  
11  
12  
13  
14  
15  
16  
17  
18  
19  
20  
21  
22  
23  
24  
25  
26  
27  
28  
29  
30  
31  
32  
33  
34  
35  
36  
37  
38  
39  
40  
41  
42  
43  
44  
45  
46  
47  
48  
49  
50  
51  
52  
53  
54  
55  
56  
57  
58  
59  
60

**Conclusion**

This large study of patient satisfaction with different aspects of long-term haemodialysis care suggests that patients' needs are not being fully met. The findings suggest that meeting patient expectations about information on dialysis choices and prognosis may be critical for improving patient experiences of long-term dialysis care and can form the basis for future healthcare services research in the dialysis setting.

For peer review only

## Acknowledgements

Dr Strippoli had full access to all of the data in the study and takes responsibility for the integrity of the data and the accuracy of the data analysis. We wish to acknowledge the contribution of all patients who responded to surveys included in this analysis.

## Funding statement

This study was funded by an unrestricted educational grant from Diaverum. The sole responsibility for decisions made about study design, data collection, data management, analysis and interpretation, writing of the report, review or approval of the manuscript and the decision to submit the manuscript for publication resides with the authors, independent of the study funder.

## Competing interests

GS is Senior Vice-President of Scientific Affairs at Diaverum. JH is Senior Vice President Medical Operations - Chief Medical Officer of Diaverum. MR, CW, EC, RG, JNF, MT, ML, AB-S, and JD are employees of Diaverum. SP receives a fellowship from the Consorzio Mario Negri Sud, Italy from provided by an unrestricted educational grant from Amgen Dompé. SP is a 2012 L'Oreal UNESCO For Women in Science Australia and New Zealand Fellow.

## Ethical approval

We obtained ethics approval for the analyses of routinely collected data from the University of Sydney Human Research Ethics Committee on 27 February 2013. The authorized personnel are Allison Tong, Jonathan Craig and Giovanni Strippoli. The project number for approval was 2013/031 and included approval of the satisfaction survey, the data custodian (Diaverum) and the survey data dated January 2008.

## Author contributions

SP designed the study, interpreted data analysis, wrote the first draft and revised the paper. GdB designed the data analysis, cleaned and analyzed data, and drafted and revised the paper. JCC

1  
2  
3 assisted with study design, interpreted the data analysis, and drafted and revised the paper. AT  
4 interpreted the data analysis, and drafted and revised the paper. MT assisted with data collection  
5 tools, interpreted the data analysis, and drafted revised the paper. FP interpreted the data analysis,  
6 and revised the paper. MR monitored data collection for the whole study, assisted with data  
7 collection and cleaning, and interpreted the data analysis, and revised the paper. JH and CW  
8 interpreted the data analysis, and revised the paper. EC, RG, JNF, MT, ML, AB-S, and JD assisted with  
9 data collection, and interpreted the data analysis, and revised the paper. GFMS designed the study  
10 and data collection tools, monitored data collection for the whole study, interpreted the data  
11 analysis, and drafted and revised the paper. He is the guarantor. All authors had full access to all of  
12 the data (including statistical reports and tables) in the study and can take responsibility for the  
13 integrity of the data and the accuracy of the data analysis.  
14  
15  
16  
17  
18  
19  
20  
21  
22  
23  
24  
25  
26  
27

### 28 **Presentation as abstract**

29  
30 This paper has previously been presented in abstract form at the American Society of Nephrology  
31 Kidney Week 2013, Atlanta, as a poster communication on Friday, November 8, 2013.  
32  
33  
34

### 35 **Data sharing statement**

36 None available  
37  
38  
39  
40  
41  
42  
43  
44  
45  
46  
47  
48  
49  
50  
51  
52  
53  
54  
55  
56  
57  
58  
59  
60

## References

1. U S Renal Data System, USRDS 2012 Annual Data Report: Atlas of Chronic Kidney Disease and End-Stage Renal Disease in the United States, National Institutes of Health, National Institute of Diabetes and Digestive and Kidney Diseases, Bethesda, MD, 2012.
2. Evans RW, Manninen DL, Garrison LP, Jr., et al. The quality of life of patients with end-stage renal disease. *New Engl J Med* 312:553-9, 1985
3. Wyld M, Morton RL, Hayen A, et al. A systematic review and meta-analysis of utility-based quality of life in chronic kidney disease treatments. *PLoS Med* 9:e1001307, 2012
4. Murtagh FE, ddington-Hall J, Higginson IJ. The prevalence of symptoms in end-stage renal disease: a systematic review. *Adv Chronic Kidney Dis* 14:82-99, 2007
5. Tong A, Sainsbury P, Carter SM, et al. Patients' priorities for health research: focus group study of patients with chronic kidney disease. *Nephrol Dial Transplant* 23:3206-14, 2008
6. Morton RL, Snelling P, Webster AC, et al. Dialysis modality preference of patients with CKD and family caregivers: a discrete-choice study. *Am J Kidney Dis* 60:102-11, 2012
7. Phrommintikul A, Haas SJ, Elsik M, et al. Mortality and target haemoglobin concentrations in anaemic patients with chronic kidney disease treated with erythropoietin: a meta-analysis. *Lancet* 369:381-8, 2007
8. Cooper BA, Branley P, Bulfone L, et al. A randomized, controlled trial of early versus late initiation of dialysis. *N Engl J Med* 363:609-19, 2010
9. Eknoyan G, Beck GJ, Cheung AK, et al. Effect of dialysis dose and membrane flux in maintenance hemodialysis. *N Engl J Med* 347:2010-9, 2002
10. Effect of cinacalcet on cardiovascular disease in patients undergoing dialysis. *N Engl J Med* 2012
11. Besarab A, Bolton WK, Browne JK, et al. The effects of normal as compared with low hematocrit values in patients with cardiac disease who are receiving hemodialysis and epoetin. *N Engl J Med* 339:584-90, 1998
12. Nissenson AR. Improving Outcomes for ESRD Patients: Shifting the Quality Paradigm. *Clin J Am Soc Nephrol* 2013

- 1  
2  
3 13. Jansen DL, Heijmans MJ, Rijken M, et al. Illness perceptions and treatment perceptions of  
4 patients with chronic kidney disease: Different phases, different perceptions? *Br J Health*  
5 *Psychol* 2012  
6  
7  
8  
9 14. Federal Register Centers for Medicare and Medicaid Services 42 CFR Parts 413 and 414. Medicare  
10 Program; End-Stage renal Disease Prospective Payment System and Quality Incentive  
11 Program; Ambulance fee Schedule; Durable Medical Equipment; and Competitive  
12 Acquisition of Certain Durable Medical Equipment, Prosthetics, Orthotics, and Supplies.  
13 Available at <http://www.gpo.gov/fdsys/pkg/FR-2011-11-10/pdf/2011-28606.pdf>. Accessed  
14 on November 23, 2012.  
15  
16  
17  
18  
19 15. Lacson E, Jr., Wang W, Lazarus JM, et al. Hemodialysis facility-based quality-of-care indicators  
20 and facility-specific patient outcomes. *Am J Kidney Dis* 54:490-7, 2009  
21  
22  
23  
24 16. Plantinga LC, Fink NE, Jaar BG, et al. Attainment of clinical performance targets and improvement  
25 in clinical outcomes and resource use in hemodialysis care: a prospective cohort study. *BMC*  
26 *Health Serv Res* 7:5, 2007  
27  
28  
29  
30 17. Vanholder R, Davenport A, Hannedouche T, et al. Reimbursement of dialysis: a comparison of  
31 seven countries. *J Am Soc Nephrol* 23:1291-8, 2012  
32  
33  
34 18. van der Veer SN, Arah OA, Visserman E, et al. Exploring the relationships between patient  
35 characteristics and their dialysis care experience. *Nephrol Dial Transplant* 27:4188-96, 2012  
36  
37  
38 19. Rubin HR, Fink NE, Plantinga LC, et al. Patient ratings of dialysis care with peritoneal dialysis vs  
39 hemodialysis. *JAMA* 291:697-703, 2004  
40  
41  
42 20. Devins GM, Mendelssohn DC, Barre PE, et al. Predialysis psychoeducational intervention extends  
43 survival in CKD: a 20-year follow-up. *Am J Kidney Dis* 46:1088-98, 2005  
44  
45  
46 21. Jungers P, Massy ZA, Nguyen-Khoa T, et al. Longer duration of predialysis nephrological care is  
47 associated with improved long-term survival of dialysis patients. *Nephrol Dial Transplant*  
48 16:2357-64, 2001  
49  
50  
51  
52 22. Winkelmayer WC, Owen WF, Jr., Levin R, et al. A propensity analysis of late versus early  
53 nephrologist referral and mortality on dialysis. *J Am Soc Nephrol* 14:486-92, 2003  
54  
55  
56  
57  
58  
59  
60

- 1  
2  
3 23. Manns BJ, Taub K, Vanderstraeten C, et al. The impact of education on chronic kidney disease  
4 patients' plans to initiate dialysis with self-care dialysis: a randomized trial. *Kidney Int*  
5 68:1777-83, 2005  
6  
7  
8  
9 24. Bayliss E, Bhardwaja B, Ross C, et al. Multidisciplinary team care may slow the rate of decline in  
10 renal function. *Clin J Am Soc Nephrol* 6:704-10, 2011  
11  
12  
13 25. ERA-EDTA Registry. ERA-EDTA Registry Annual Report 2010. Academic Medical Center,  
14 Department of Medical Informatics, Amsterdam, The Netherlands. Available at  
15 <http://www.era-edta-reg.org/files/annualreports/pdf/AnnRep2010.pdf>. (accessed 4 March  
16 2014).  
17  
18  
19  
20 26. Rubin HR, Jenckes M, Fink NE, et al. Patient's view of dialysis care: development of a taxonomy  
21 and rating of importance of different aspects of care. CHOICE study. Choices for Healthy  
22 Outcomes in Caring for ESRD. *Am J Kidney Dis* 30:793-801, 1997  
23  
24  
25  
26 27. Snijders TAB, Bosker R. *Multilevel analysis: An introduction to basic and advanced multilevel*  
27 *modeling*. London: Sage, 1999.  
28  
29  
30 28. Sullivan LM, Dukes KA, Losina E. Tutorial in biostatistics. An introduction to hierarchical linear  
31 modelling. *Stat Med* 18:855-88, 1999  
32  
33  
34 29. Suki WN, Zabaneh R, Cangiano JL, et al. Effects of sevelamer and calcium-based phosphate  
35 binders on mortality in hemodialysis patients. *Kidney Int* 72:1130-7, 2007  
36  
37  
38  
39 30. Palmer SC, Nistor I, Craig JC, et al. Cinacalcet in patients with chronic kidney disease: a  
40 cumulative meta-analysis of randomized controlled trials. *PLoS Med* 10:e1001436, 2013  
41  
42  
43 31. Morton RL, Tong A, Howard K, et al. The views of patients and carers in treatment decision  
44 making for chronic kidney disease: systematic review and thematic synthesis of qualitative  
45 studies. *BMJ* 340:c112, 2010  
46  
47  
48  
49 32. Ormandy P. Information topics important to chronic kidney disease patients: a systematic  
50 review. *J Ren Care* 34:19-27, 2008  
51  
52  
53 33. Wachterman M, Marcantonio E, Davis R, et al. Relationship between the prognostic expectations  
54 of seriously ill patients undergoing hemodialysis and their nephrologists. *JAMA Intern Med*  
55 173:1206-14, 2013  
56  
57  
58  
59  
60

- 1  
2  
3 34. Selman L, Higginson IJ, Agupio G, et al. Meeting information needs of patients with incurable  
4 progressive disease and their families in South Africa and Uganda: multicentre qualitative  
5 study. *BMJ* 338:b1326, 2009  
6  
7  
8  
9 35. Francis V, Korsch BM, Morris MJ. Gaps in doctor-patient communication. *New England Journal of*  
10 *Medicine* 280:535-40, 1969  
11  
12  
13 36. Davison SN, Simpson C. Hope and advance care planning in patients with end stage renal disease:  
14 qualitative interview study. *BMJ* 333:886, 2006  
15  
16  
17 37. Hagerty RG, Butow PN, Ellis PM, et al. Communicating prognosis in cancer care: a systematic  
18 review of the literature. *Ann Oncol* 16:1005-53, 2005  
19  
20  
21 38. Mack JW, Wolfe J, Cook EF, et al. Hope and prognostic disclosure. *J Clin Oncol* 25:5636-42, 2007  
22  
23  
24 39. Audrey S, Abel J, Blazeby JM, et al. What oncologists tell patients about survival benefits of  
25 palliative chemotherapy and implications for informed consent: qualitative study. *BMJ*  
26 337:a752, 2008  
27  
28  
29  
30 40. Gattellari M, Voigt KJ, Butow PN, et al. When the treatment goal is not cure: are cancer patients  
31 equipped to make informed decisions? *J Clin Oncol* 20:503-13, 2002  
32  
33  
34 41. Fallowfield L, Jenkins V. Communicating sad, bad, and difficult news in medicine. *The Lancet*  
35 363:312-19, 2004  
36  
37  
38 42. Barry MJ, Edgman-Levitan S. Shared Decision Making — The Pinnacle of Patient-Centered Care.  
39 *New England Journal of Medicine* 366:780-81, 2012  
40  
41  
42 43. Howell M, Tong A, Wong G, et al. Important outcomes for kidney transplant recipients: a nominal  
43 group and qualitative study. *Am J Kidney Dis* 60:186-96, 2012  
44  
45  
46 44. Levin A, Lewis M, Mortiboy P, et al. Multidisciplinary predialysis programs: Quantification and  
47 limitations of their impact on patient outcomes in two Canadian settings. *American Journal*  
48 *of Kidney Diseases* 29:533-40, 1997  
49  
50  
51  
52 45. Bowling A. An "inverse satisfaction law"? Why don't older patients criticise health services? *J*  
53 *Epidemiol Community Health* 56:482, 2002  
54  
55  
56  
57  
58  
59  
60



- 1  
2  
3 46. Jaipaul CK, Rosenthal GE. Are older patients more satisfied with hospital care than younger  
4 patients? *J Gen Intern Med* 18:23-30, 2003  
5  
6  
7 47. Meehan T, Fine MJ, Krumholz HM, et al. Quality of care, process, and outcomes in elderly  
8 patients with pneumonia. *JAMA: The Journal of the American Medical Association* 278:2080-  
9 84, 1997  
10  
11  
12 48. Schenker Y, Stewart A, Na B, et al. Depressive symptoms and perceived doctor-patient  
13 communication in the Heart and Soul study. *J Gen Intern Med* 24:550-6, 2009  
14  
15  
16 49. Carlin CS, Christianson JB, Keenan P, et al. Chronic illness and patient satisfaction. *Health services*  
17 *research* 47:2250-72, 2012  
18  
19  
20 50. Bidaut-Russell M, Gabriel SE, Scott CG, et al. Determinants of patient satisfaction in chronic  
21 illness. *Arthritis and rheumatism* 47:494-500, 2002  
22  
23  
24 51. Needleman J, Buerhaus P, Mattke S, et al. Nurse-staffing levels and the quality of care in  
25 hospitals. *N Engl J Med* 346:1715-22, 2002  
26  
27  
28 52. Jha AK, Orav EJ, Zheng J, et al. Patients' perception of hospital care in the United States. *N Engl J*  
29 *Med* 359:1921-31, 2008  
30  
31  
32 53. Marcinowicz L, Chlabicz S, Grebowski R. Patient satisfaction with healthcare provided by family  
33 doctors: primary dimensions and an attempt at typology. *BMC Health Serv Res* 9:63, 2009  
34  
35  
36 54. Coyle J. Exploring the meaning of "dissatisfaction" with health care: The importance of "personal  
37 identity threat". *Sociol Health Illn* 21:95-124, 1999  
38  
39  
40 55. Manary MP, Boulding W, Staelin R, et al. The Patient Experience and Health Outcomes. *New*  
41 *England Journal of Medicine* 368:201-03, 2013  
42  
43  
44  
45  
46  
47  
48  
49  
50  
51  
52  
53  
54  
55  
56  
57  
58  
59  
60

1  
2  
3  
4  
5  
6  
7  
8  
9  
10  
11  
12  
13  
14  
15  
16  
17  
18  
19  
20  
21  
22  
23  
24  
25  
26  
27  
28  
29  
30  
31  
32  
33  
34  
35  
36  
37  
38  
39  
40  
41  
42  
43  
44  
45  
46  
47  
48  
49  
50  
51  
52  
53  
54  
55  
56  
57  
58  
59  
60

**Figure Legends**

**Figure 1** Probabilities of excellent or very good ratings of overall care by dialysis patients

For peer review only

1  
2  
3  
4  
5  
6  
7  
8  
9  
10  
11  
12  
13  
14  
15  
16  
17  
18  
19  
20  
21  
22  
23  
24  
25  
26  
27  
28  
29  
30  
31  
32  
33  
34  
35  
36  
37  
38  
39  
40  
41  
42  
43  
44  
45  
46  
47  
48  
49

For peer review only

## Tables

**Table 1 | Characteristics of participants who responded and those who did not respond to satisfaction survey**

| Characteristic                                                         | Complete or partial response to survey (n=2145) | No response to survey (n=603) | P value |
|------------------------------------------------------------------------|-------------------------------------------------|-------------------------------|---------|
| Age, years                                                             | 61.0 (15.5)                                     | 62.7 (14.8)                   | 0.04    |
| Gender, n (%) male                                                     | 1190 (55.5)                                     | 314 (52.1)                    | 0.14    |
| Highest school education                                               |                                                 |                               |         |
| ≤ 5 years                                                              | 847 (42.1)                                      | 238 (41.6)                    | 0.82    |
| >5 years                                                               | 1163 (57.9)                                     | 334 (58.4)                    |         |
| Depression score (Center for Epidemiological Studies-Depression Scale) |                                                 |                               |         |
| < 18                                                                   | 947 (49.6)                                      | 67 (46.7)                     | 0.25    |
| ≥ 18                                                                   | 963 (50.4)                                      | 83 (55.3)                     |         |
| Married                                                                | 1303 (60.8)                                     | 377 (62.5)                    | 0.43    |
| Living alone                                                           | 275 (13.0)                                      | 97 (16.2)                     | 0.04    |
| Distance of housing from dialysis unit                                 |                                                 |                               | 0.001   |
| < 20 kilometres                                                        | 1540 (73.1)                                     | 392 (65.8)                    |         |
| > 20 kilometres                                                        | 567 (26.9)                                      | 204 (34.2)                    |         |
| Active on waiting list for transplant                                  | 309 (14.4)                                      | 72 (11.9)                     | 0.12    |
| Previous kidney transplant                                             | 148 (6.9)                                       | 28 (4.7)                      | 0.05    |
| Employment                                                             |                                                 |                               | 0.002   |
| Employed                                                               | 331 (15.7)                                      | 76 (12.9)                     |         |
| Unemployed                                                             | 1451 (68.8)                                     | 450 (76.1)                    |         |
| Receiving benefit/pension                                              | 328 (15.6)                                      | 65 (11.0)                     |         |
| Comorbid conditions                                                    |                                                 |                               |         |
| Diabetes mellitus                                                      | 486 (23.5)                                      | 146 (25.1)                    | 0.42    |
| Hypertension                                                           | 1347 (68.5)                                     | 376 (70.3)                    | 0.65    |
| Prior cardiovascular event                                             | 472 (22.0)                                      | 124 (20.6)                    | 0.45    |
| Time on dialysis, months                                               | 37.3 (16.3-70.9)                                | 36.0 (17.0-75.7)              | 0.69    |
| Dialysis treatment time, minutes per session                           | 235.9 (20.5)                                    | 234.3 (23.5)                  | 0.35    |
| Dialysis adequacy, single pool Kt/V                                    | 1.6 (0.3)                                       | 1.5 (0.3)                     | 0.02    |
| Interdialytic weight gain, kg                                          | 2.29 (1.03)                                     | 2.37 (1.09)                   | 0.16    |
| Serum values                                                           |                                                 |                               |         |
| Haemoglobin, g/l                                                       | 11.0 (1.4)                                      | 11.0 (1.3)                    | 0.31    |
| Systolic blood pressure, mmHg                                          | 130.0 (18.0)                                    | 128.4 (17.3)                  | 0.07    |
| Serum albumin, g/l                                                     | 3.9 (0.5)                                       | 3.9 (0.5)                     | 0.73    |
| Serum phosphorus, mmol/l                                               | 4.6 (1.4)                                       | 4.6 (1.4)                     | 0.69    |
| Serum ferritin, µg/l                                                   | 430 (242-660)                                   | 409 (242-672)                 | 0.71    |
| Serum parathyroid hormone, pmol/l                                      | 282 (162-481)                                   | 287 (167-530)                 | 0.23    |
| Antidepressant medication                                              | 113 (5.3)                                       | 26 (4.3)                      | 0.34    |
| Anxiolytic medication                                                  | 291 (13.6)                                      | 86 (14.3)                     | 0.66    |
| Country                                                                |                                                 |                               | <0.0001 |
| Argentina                                                              | 549 (81.9)                                      | 121 (18.1)                    |         |
| Hungary                                                                | 556 (81.4)                                      | 127 (18.6)                    |         |
| Italy                                                                  | 648 (73.6)                                      | 232 (26.4)                    |         |
| Poland                                                                 | 355 (74.4)                                      | 122 (25.6)                    |         |
| Portugal                                                               | 37 (97.4)                                       | 1 (2.6)                       |         |

Data are expressed as mean (SD), number (%), or median (25<sup>th</sup> percentile, 75<sup>th</sup> percentile). Kt/V refers to the clearance of urea and is a measure of the amount of dialysis received.

**Table 2 | Proportion of patients who gave an excellent rating to overall haemodialysis care according to patient characteristics**

| Characteristic                                            | Excellent rating<br>N (%) | Other rating<br>N (%) | Unadjusted odds<br>ratio | Clustering and case-<br>mix adjusted odds<br>ratio |
|-----------------------------------------------------------|---------------------------|-----------------------|--------------------------|----------------------------------------------------|
| Age                                                       |                           |                       |                          |                                                    |
| 18-49 years                                               | 183 (19.1)                | 300 (28.1)            | 1.00 (reference)         | 1.00                                               |
| 50-59 years                                               | 146 (15.3)                | 215 (20.1)            | 1.11 (0.84-1.47)         | 1.01 (0.70-1.44)                                   |
| 59-69 years                                               | 221 (23.1)                | 218 (20.4)            | 1.66 (1.28-2.16)         | 1.18 (0.82-1.69)                                   |
| ≥70 years                                                 | 406 (42.5)                | 335 (31.4)            | 1.99 (1.57-2.51)         | 1.44 (1.01-2.04)                                   |
| Male gender                                               | 466 (46.1)                | 483 (43.1)            | 1.13 (0.95-1.34)         | 1.12 (0.88-1.44)                                   |
| Highest school education                                  |                           |                       |                          |                                                    |
| ≤5 years                                                  | 465 (49.0)                | 375 (35.8)            | 1.72 (1.44-2.06)         | 0.95 (0.74-1.21)                                   |
| >5 years                                                  | 485 (51.1)                | 673 (64.2)            | 1.00 (reference)         | 1.00                                               |
| Occupational status                                       |                           |                       |                          |                                                    |
| Employed                                                  | 120 (12.0)                | 209 (19.0)            | 0.59 (0.46-0.75)         | 0.79 (0.56-1.12)                                   |
| Unemployed or pension                                     | 876 (88.0)                | 893 (81.0)            | 1.00                     | 1.00                                               |
| Married                                                   | 601 (59.4)                | 693 (61.8)            | 0.91 (0.76-1.08)         | 0.86 (0.67-1.10)                                   |
| Distance of housing from dialysis unit                    |                           |                       |                          |                                                    |
| <20 kilometres                                            | 741 (73.9)                | 792 (72.5)            | 1.00                     | 1.00                                               |
| >20 kilometres                                            | 262 (26.1)                | 300 (27.5)            | 0.93 (0.77-1.13)         | 1.18 (0.91-1.54)                                   |
| Waiting list for kidney transplant                        | 131 (13.0)                | 176 (15.7)            | 0.80 (0.63-1.02)         | 0.80 (0.56-1.14)                                   |
| Comorbid conditions                                       |                           |                       |                          |                                                    |
| Diabetes mellitus                                         | 249 (25.4)                | 233 (21.6)            | 1.24 (1.01-1.52)         | 1.38 (0.78-2.46)                                   |
| Prior cardiovascular event                                | 248 (24.5)                | 220 (19.6)            | 1.33 (1.08-1.63)         | 0.89 (0.63-1.26)                                   |
| Center for Epidemiological Studies-Depression Scale score |                           |                       |                          |                                                    |
| <18                                                       | 472 (52.5)                | 472 (47.2)            | 1.00 (reference)         | 1.00 (reference)                                   |
| ≥18                                                       | 427 (47.5)                | 527 (52.8)            | 0.81 (0.68-0.97)         | 0.56 (0.44-0.71)                                   |
| Dialysis adequacy, <i>single pool Kt/V</i>                |                           |                       |                          |                                                    |
| <1.4                                                      | 202 (20.6)                | 245 (22.2)            | 1.00 (reference)         | 1.00                                               |
| ≥1.4                                                      | 778 (79.4)                | 856 (77.8)            | 1.10 (0.89-1.36)         | 1.11 (0.83-1.49)                                   |
| Serum phosphorus, mmol/l                                  |                           |                       |                          |                                                    |
| <1.45                                                     | 516 (51.5)                | 509 (45.9)            | 1.00 (reference)         | 1.00                                               |
| ≥1.45                                                     | 486 (48.5)                | 601 (54.1)            | 0.80 (0.67-0.95)         | 0.96 (0.76-1.23)                                   |
| Haemoglobin, g/l                                          |                           |                       |                          |                                                    |
| <110                                                      | 476 (47.6)                | 537 (48.2)            | 1.00 (reference)         | 1.00                                               |
| ≥110                                                      | 525 (52.4)                | 578 (51.8)            | 1.02 (0.86-1.22)         | 0.90 (0.71-1.14)                                   |
| Albumin, g/dl                                             |                           |                       |                          |                                                    |
| <3.8                                                      | 371 (37.8)                | 369 (33.7)            | 1.00 (reference)         | 1.00                                               |
| 3.8-4.0                                                   | 277 (28.2)                | 324 (29.6)            | 0.85 (0.69-1.05)         | 1.07 (0.80-1.42)                                   |
| ≥4.1                                                      | 333 (33.9)                | 401 (36.6)            | 0.83 (0.67-1.01)         | 0.78 (0.58-1.05)                                   |
| Systolic blood pressure, mmHg                             |                           |                       |                          |                                                    |
| ≤120                                                      | 270 (27.2)                | 353 (32.1)            | 1.00 (reference)         | 1.00                                               |
| 121-140                                                   | 404 (40.6)                | 441 (40.0)            | 1.20 (0.97-1.47)         | 0.89 (0.67-1.19)                                   |
| ≥140                                                      | 320 (32.2)                | 307 (27.9)            | 1.36 (1.09-1.70)         | 1.03 (0.76-1.40)                                   |
| Country                                                   |                           |                       |                          |                                                    |
| Poland                                                    | 48 (4.8)                  | 303 (27.0)            | 0.09 (0.07-0.13)         | -                                                  |
| Argentina                                                 | 172 (17.0)                | 372 (33.2)            | 0.28 (0.22-0.35)         | -                                                  |
| Italy                                                     | 405 (40.1)                | 242 (21.6)            | 1.00 (reference)         | -                                                  |
| Hungary                                                   | 355 (35.1)                | 198 (17.7)            | 1.07 (0.85-1.36)         | -                                                  |
| Portugal                                                  | 31 (3.1)                  | 6 (0.5)               | 3.09 (1.27-7.51)         | -                                                  |

Clustering and case-mix adjusted model controlled for age, gender, education level, occupational status, marital status, distance from dialysis centre, activity on transplant waiting list, comorbid conditions (diabetes, hypertension, cardiovascular event) depression score, cause of end-stage kidney disease, duration of dialysis per session and dialysis dose, dialysis adequacy (Kt/V), serum values (haemoglobin; phosphorus) and country.

# Patient satisfaction with in-centre haemodialysis care: An international survey

Suetonia C. Palmer, MBChB PhD,<sup>1</sup> Giorgia de Berardis, PhD,<sup>2</sup> Jonathan C. Craig, MBChB DCH MM PhD,<sup>3</sup> Allison Tong, PhD,<sup>3</sup> Marcello Tonelli, MD PhD,<sup>4</sup> Fabio Pellegrini, MSc<sup>2,5</sup> Marinella Ruospo, MSc<sup>6</sup> Jörgen Hegbrant, MD PhD,<sup>6</sup> Charlotta Wollheim, MSc,<sup>6</sup> Eduardo Celia, MD,<sup>6</sup> Ruben Gelfman, MD,<sup>6</sup> Juan Nin Ferrari, MD,<sup>6</sup> Marietta Török, MD,<sup>6</sup> Marco Murgo, MD,<sup>6</sup> Miguel Leal, MD,<sup>6</sup> Anna Bednarek-Skublewska, MD,<sup>6</sup> Jan Dulawa, MD,<sup>6</sup> and Giovanni F.M. Strippoli, MD MM MPH PhD<sup>2,3,6,7</sup>

<sup>1</sup>Department of Medicine, University of Otago Christchurch, Christchurch, New Zealand

<sup>2</sup>Consorzio Mario Negri Sud, S. Maria Imbaro, Italy

<sup>3</sup>School of Public Health, University of Sydney, Sydney, Australia

<sup>4</sup>Division of Nephrology and Immunology, University of Alberta, Edmonton, Canada

<sup>5</sup>Scientific Institute Casa Sollievo della Sofferenza, Italy

<sup>6</sup>Diaverum Scientific Medical Office, Lund, Sweden

<sup>7</sup>Department of Emergency and Organ Transplantation, University of Bari, Italy

## Corresponding author and address for reprints:

Giovanni FM Strippoli,  
Department of Clinical Pharmacology and Epidemiology,  
Consorzio Mario Negri Sud,  
Via Nazionale 8/a, 66030,  
S Maria Imbaro,  
Italy ([gfmstrippoli@gmail.com](mailto:gfmstrippoli@gmail.com))  
Phone: +39 3358756828  
Facsimile: +39 0805096087

**Word count (for abstract):** 250

**Word count (for text):** 3454

**Running title** Patient satisfaction with haemodialysis

**Key words** Patient satisfaction, chronic dialysis, chronic kidney failure

**Abstract****Objectives**

To evaluate patient experiences of specific aspects of haemodialysis care across several countries

**Design**

Cross-sectional survey using the Choices for Healthy Outcomes in Caring for End-Stage Renal Disease (CHOICE) questionnaire

**Setting**

Haemodialysis clinics within a single provider in Europe and South America

**Participants**

2748 adults treated in haemodialysis

**Primary and secondary outcomes**

The primary outcome was patient satisfaction with overall care. Secondary outcomes included patient experiences of individual aspects of dialysis care

**Results**

2145 (78.1%) adults responded to the questionnaire. Fewer than half (46.5% [95% confidence interval, 44.5 to 48.6]) rated their overall care as excellent. Global perceptions of care were uninfluenced by most respondent characteristics except age and depressive symptoms; older respondents were less critical of their care (adjusted odds ratio for excellent rating 1.44 [1.01-2.04]) and those with depressive symptoms were less satisfied (0.56 [0.44 to 0.71]). Aspects of care that respondents most frequently ranked as excellent were staff attention to dialysis vascular access (54 [52-56]%), caring of nurses (53 [51-55]%), staff responsiveness to pain or discomfort (51 [49-53]%), caring, helpfulness and sensitivity of dialysis staff (50 [48-52]%), and ease of reaching dialysis staff by telephone (48 [46-50]%). The aspects of care least frequently ranked as excellent were information provided when choosing a dialysis modality (23 [21-25]%), ease of seeing a social worker (28 [24-

1  
2  
3 32]), information provided about dialysis (34 [32-36]%), accuracy of information from nephrologist  
4  
5 (for example, about prognosis or likelihood of a kidney transplant) (37 [35-39]%), and accuracy of  
6  
7 nephrologists' instructions (39 [36-41]%).  
8  
9

## 10 **Conclusion**

11  
12 Haemodialysis patients are least satisfied with the complex aspects of care. Patients' expectations  
13  
14 for accurate information, prognosis, the likelihood of kidney transplantation and their options when  
15  
16 choosing dialysis treatment need to be considered when planning healthcare research and  
17  
18 healthcare practices.  
19  
20

## 21 **Article summary**

### 22 **Strengths and limitations of this study**

- 23  
24  
25  
26 • The study is based on a large multinational survey of patients with chronic kidney failure  
27  
28 needing treatment with long-term dialysis. There were no specific exclusions other than  
29  
30 refusal or inability to complete the survey questions  
31  
32
- 33  
34 • This study adds knowledge across a large cohort of the specific aspects of dialysis care that  
35  
36 fewer patients find satisfactory  
37  
38
- 39  
40 • The limitations were the lack of data about the health service characteristics that might have  
41  
42 contributed to patient experiences as well as linkages to patient relevant outcomes  
43  
44  
45  
46  
47  
48  
49  
50  
51  
52  
53  
54  
55  
56  
57  
58  
59  
60



## Introduction

Patients treated with haemodialysis experience mortality rates approaching 15-20% each year<sup>[1]</sup> and have profoundly impaired quality of life,<sup>[2 3]</sup> contributed to by severe symptoms of fatigue, low appetite, pain, sleep disorders, anxiety, nausea, and restless legs.<sup>[4]</sup> While interventions in haemodialysis trials and healthcare regulations have largely focused on biomarker endpoints and quantitative outcomes (mortality and cardiovascular events) to evaluate care, dialysis patients value normalization of their lives, economic efficiency in healthcare, and how their personal preferences are met, including reducing dietary and travel restrictions.<sup>[5 6]</sup> This mismatch in patient, provider and research priorities has resulted in clinical research and practice that have not improved patient-centred outcomes for dialysis patients<sup>[7-11]</sup> and consumed considerable resources.<sup>[12]</sup>

Given that patients treated with in-centre haemodialysis attend dialysis care at least three times per week for several hours each time, their experiences of dialysis care are likely to have an important impact on living with chronic illness.<sup>[3 13]</sup> By contrast, health funders have traditionally used only clinical performance indicators such as anaemia, blood pressure, nutrition, dialysis vascular access and adequacy of solute removal to evaluate and allocate reimbursement for dialysis provision.<sup>[14-17]</sup> While improving patient satisfaction with dialysis treatment has the potential to increase quality of life and improve patient-level outcomes, data to inform this objective are scarce.<sup>[18 19]</sup> Studies indicate that healthcare delivery in the latter stages of chronic kidney disease such as predialysis nephrology care, multidisciplinary management, psycho-education interventions and prognosis communication may improve quantitative health outcomes in the dialysis setting, but there is little information on the effects of these strategies on outcomes relevant to patients, that include symptoms, function and quality of life.<sup>[20-24]</sup> In addition, evaluations of patient experiences of haemodialysis care are available and can shape our knowledge about what patients value, but in existing studies smaller population sizes within single countries limit the power to adjust for case-mix<sup>[19]</sup> and perceptions of care are limited to global scores which may restrict our understanding of

1  
2  
3 the contributions of specific, and potentially modifiable, aspects of care on overall patient  
4  
5 experience.<sup>[18]</sup>  
6  
7

8 Greater understanding of how patients experience all facets of long-term dialysis is needed to  
9  
10 inform the design of large-scale trials which evaluate targeted healthcare strategies to improve the  
11  
12 lives of dialysis patients in ways they value. Accordingly, we aimed, for the first time, to describe  
13  
14 patient satisfaction with haemodialysis care in a large multi-national cohort to assess patients'  
15  
16 experiences of haemodialysis care while accounting for clinical and demographic characteristics.  
17  
18

## 19 20 **Methods**

### 21 22 **Participants**

23  
24 We used data from Diaverum, a network which provides renal care including long-term in-centre  
25  
26 haemodialysis treatment for more than 20,000 patients in Europe and South America and surveys  
27  
28 patients at least annually about their satisfaction with care. We conducted a cross-sectional analysis  
29  
30 of routinely-gathered survey data collected in 2008. We selected a convenience sample of 15% of  
31  
32 patients in the network from clinics that were willing to contribute. Data were included for selected  
33  
34 patients who were aged 18 years or older and treated with haemodialysis between January and June  
35  
36 2008 in centres located in Europe (Hungary, Italy, Poland, and Portugal) and South America  
37  
38 (Argentina). All clinical centres were managed during the study period according to the same  
39  
40 standards of care. Of the 2748 patients selected (Argentina, n=670; Hungary, n=683; Italy, n=880;  
41  
42 Poland, n=477; Portugal, n=38), 2145 (78.1%) responded and 1846 (67.2%) provided complete  
43  
44 responses to all questions. We obtained ethics approval to analyse routinely-gathered clinical data  
45  
46 from the University of Sydney Human Research Ethics Committee (project number 2013/031). The  
47  
48 study was conducted according to the requirements of the Declaration of Helsinki. The mean age  
49  
50 and gender composition of our cohort is similar to prevalent patients treated with kidney  
51  
52 replacement therapy in Europe.<sup>[25]</sup>  
53  
54  
55  
56  
57  
58  
59  
60

### Key measures

We collected data from patient responses to the Choices for Healthy Outcomes In Caring for End-stage kidney disease (CHOICE) questionnaire, which evaluates satisfaction with dialysis treatment (see the **eAppendix** for the full survey).<sup>[26]</sup> The CHOICE questionnaire was originally developed by Rubin and colleagues using a focus group of long-term in-centre haemodialysis and home-based peritoneal dialysis patients to identify aspects of dialysis care most important to them. The items identified were then ranked by a larger number of long-term dialysis patients to identify the top 25 items they considered extremely important. The questionnaire asks 20 questions about patients' experiences relating to these different aspects of dialysis care on a 5-point Likert scale (poor, fair, good, very good, excellent). In addition, three questions ask patients to rate the overall quality of their care (poor, fair, good, very good, excellent, or not applicable), how much about their care could be better (many things, a few things, one or two things, and nothing could be better at all), and whether they would recommend their care service to others who may need dialysis care (definitely not, probably not, not sure, probably yes, and definitely yes) (**eTable 1**). In addition, we summarized measures of key performance indicators for dialysis within each country (**eTable 2**) for the two quarters in which satisfaction data were collected and reported these as overall performance scores for each participating country.

In the present analysis, the question "How easy is it to meet the social worker when you want to?" was only included in the annual survey in Hungary and the two global questions about care "Thinking about your dialysis care overall, how much could be better?" and "Would you recommend your dialysis centre to a friend or relative who needs dialysis?" were omitted in the annual survey of Italian patients.

Surveys were provided to patients by dialysis clinical staff during routine dialysis care. Patients self-completed the questionnaires anonymously during a dialysis session and data were de-identified. We then linked survey data to concurrent demographic, clinical, and laboratory information in a

1  
2  
3 clinical database using a unique patient identifier; additional data were provided where necessary by  
4  
5 the treating physician on a standardized case report form. We used questionnaires in the patients'  
6  
7 native language after translation and linguistic validation by the MAPI Institute ([institute.com](http://www.mapi-<br/>8<br/>9<br/>10<br/>11<br/>12<br/>13<br/>14<br/>15<br/>16<br/>17<br/>18<br/>19<br/>20<br/>21<br/>22<br/>23<br/>24<br/>25<br/>26<br/>27<br/>28<br/>29<br/>30<br/>31<br/>32<br/>33<br/>34<br/>35<br/>36<br/>37<br/>38<br/>39<br/>40<br/>41<br/>42<br/>43<br/>44<br/>45<br/>46<br/>47<br/>48<br/>49<br/>50<br/>51<br/>52<br/>53<br/>54<br/>55<br/>56<br/>57<br/>58<br/>59<br/>60<br/><a href=)).

### Analysis

We considered a response to the survey as complete when interpretable answers were provided for all survey questions and partially complete when one or more answers was missing. We used chi-square tests and Mann-Whitney U tests to compare the characteristics of patients who responded to the survey with those who did not. The primary outcome of interest was the proportion of respondents who evaluated their overall care as 'excellent'. We also estimated the proportion of respondents who evaluated each separate dimension of care as 'excellent'. To account for the multilevel nature of the data (patients clustered within countries) and to control simultaneously for the possible confounding effects of the different variables, we used multivariate multilevel logistic regression models.<sup>[27 28]</sup> We constructed clustering and case-mix adjusted models that controlled for the following potential confounding variables: age, gender, education level, occupational status, marital status, distance to travel to the dialysis centre, kidney transplant waiting list status, comorbid conditions (diabetes mellitus, hypertension, cardiovascular event), depression score, cause of end-stage kidney disease, duration of dialysis per session, dialysis dose, adequacy of dialysis, and serum values of haemoglobin and phosphorus. We performed multilevel logistic regression using the SAS language macro routine Proc GLIMMIX (SAS Institute Inc., Cary, NC; Release 9.1, 2002-2003; <http://www.sas.com>).

## Results

### Characteristics of patients in the network and respondents to questionnaire

Respondents were younger and lived closer to their dialysis centre than non-respondents (Table 1). Questionnaire response rates differed by country; patients in Portugal were most likely to respond to the survey (97.4%), with decreasing response rates in Argentina (81.9%), Hungary (81.4%), Poland (74.4%), and Italy (73.6%). Overall, respondents were  $61.0 \pm 15.5$  years, most were men (55.5%), 40.2% had 6 to 8 years of school education, and about half had depressive symptoms according to the Center for Epidemiological Studies-Depression (CES-D) Scale (score of 18 or above). Two-thirds of respondents were married (60.8%), most were unemployed (68.8%), and a minority had previously received a kidney transplant (6.9%).

### Survey responses

Fewer than half of respondents rated their overall care as excellent (1057/2271; 46.5% [95% confidence interval (CI), 44.5 to 48.6%]) and about three-quarters rated their care as excellent or very good (1783/2271; 78.5% [CI 76.8 to 80.2%]) (Figure 1). The proportion rating their overall care as excellent was lowest in Poland (13.7%), with an increasing proportion in Argentina (30.3%), Italy (61.2%), Hungary (63.5%), and Portugal (83.8%) (eTable 1).

Table 2 shows the association between respondent characteristics and the proportion rating haemodialysis care as excellent. In analyses clustered by country and controlled for demographic and clinical variables, older respondents were more likely to consider care excellent (adjusted odds ratio [AOR] for those 70 years or older, 1.44 [CI, 1.01 to 2.04] compared with those aged 18 to 49 years) and those with depressive symptoms were less likely to consider that care met excellent standards (AOR, 0.56 [CI, 0.44 to 0.71]). Gender, education, marital status, comorbidity (including diabetes and cardiovascular disease) and the time spent on dialysis each week were not associated with perspectives of overall care.

1  
2  
3 **Figure 1** shows the proportion of respondents who considered that nothing about their care could  
4 be better and **eTable 3** provides responses according to clinical, demographic and treatment-based  
5 characteristics. Overall, about one-third of respondents considered that nothing about their care  
6 could be better (486/1477; 32.9% [CI, 30.6% to 35.3%]). Respondents aged 70 years or older (AOR,  
7 2.20 [CI, 1.47 to 3.31]) and those living further away from their dialysis centre (AOR, 1.39 [CI, 1.04 to  
8 1.85]) were more likely to consider that no aspect of their care required improvement. In the four  
9 countries in which this question was asked (Argentina, Hungary, Poland, and Portugal), compared  
10 with Argentina, patients in Hungary (AOR, 1.37 [CI, 1.06 to 1.77]) and Poland (AOR, 1.82 [CI, 1.37 to  
11 2.42]) were more likely to consider than nothing about their care needed to be changed.

12  
13  
14  
15  
16  
17  
18  
19  
20  
21  
22  
23 In the four countries in which the question “would you recommend your dialysis centre to a friend or  
24 relative who needed dialysis” was asked, 1022 of 1587 respondents (64.4% [CI, 62.0 to 66.7%])  
25 would definitely recommend their dialysis centre. Older respondents (AOR, 1.84 [CI, 1.24-2.74]) and  
26 those living further from their dialysis centre (AOR, 1.37 [CI, 1.03-1.83]) were more likely to  
27 recommend their dialysis centre to others for care, whereas those with depressive symptoms were  
28 less likely to recommend their care to others (AOR, 0.67 [CI, 0.51 to 0.87]) (**eTable 4**). Compared to  
29 Argentina, strong recommendations would more likely be made by respondents in Hungary (AOR  
30 2.38 [CI 1.84-3.07]) and Portugal (AOR 28.2 [CI 3.84-207.39]).

31  
32  
33  
34  
35  
36  
37  
38  
39  
40  
41  
42 The five items that respondents rated most frequently as excellent were “attention of staff to  
43 cleanliness of the dialysis vascular access site” (54% ranked as excellent), “caring and helpfulness of  
44 nurses” (53%), “response of staff to pain or discomfort” (51%), “caring, helpfulness and sensitivity of  
45 dialysis staff” (50%), and “ease of reaching staff by telephone” (48%) (**Figure 1**). The five items rated  
46 least frequently by respondents as excellent were “the amount of information when choosing  
47 dialysis modality”(23%), “the ease of seeing a social worker when needed” (28%), “amount of  
48 information from dialysis staff” (34%), “accuracy of information from nephrologist including  
49 prognosis and likelihood of getting a kidney transplant” (37%), and “accuracy of instructions from  
50  
51  
52  
53  
54  
55  
56  
57  
58  
59  
60

1  
2  
3 nephrologist" (39%). In general, the amount of caring and concern shown by staff, particularly by  
4  
5 nurses, and the ability of patients to contact dialysis staff were ranked highly, whereas the amount  
6  
7 and delivery of information about treatment choices and prognosis as well as access to social worker  
8  
9 staff and nephrologists were ranked lowest.  
10

11  
12 A composite measure of key performance indicators were similar in the included countries during  
13  
14 the recruitment period (in descending order with a higher value indicating higher performance:  
15  
16 Hungary 1535, Portugal 1551, Italy 1543, Poland 1381, and Argentina 1303) and were associated  
17  
18 with the proportion of respondents reporting excellent overall care (for each unit increase in  
19  
20 performance score, the proportion of respondents who ranked care as excellent increased by 0.21%  
21  
22 (95% CI -0.02% to 0.44%).  
23  
24  
25

## 26 Discussion

27  
28 We report the largest study of patient satisfaction with dialysis care to date and identify specific  
29  
30 deficits in long-term dialysis care across several countries. Most respondents viewed their overall  
31  
32 dialysis care as below excellent and needing improvement. Specifically, while the majority of  
33  
34 respondents approved of the more technical aspects of dialysis treatment (attention to the  
35  
36 cleanliness of the dialysis vascular access site, caring and helpfulness of nurses and dialysis staff, and  
37  
38 attention by staff to immediate needs (pain, discomfort, sterile procedures)), a minority were  
39  
40 satisfied with the more complex and integrated components of care. These were the accuracy and  
41  
42 amount of information given by staff to patients about their dialysis treatment, prognosis and  
43  
44 making choices between peritoneal dialysis and haemodialysis in addition to support from social  
45  
46 worker staff. Older respondents were generally less critical of their haemodialysis care, while those  
47  
48 with depressive symptoms were less frequently satisfied. Other demographic and clinical features  
49  
50 did not reliably influence perceptions of overall care and country of treatment had inconsistent  
51  
52 effects on satisfaction. Better dialysis care performance scores were associated with higher overall  
53  
54 patient satisfaction.  
55  
56  
57  
58  
59  
60

1  
2  
3 Our patients' perspectives together with other similar studies from the United States[19] and The  
4  
5 Netherlands[18] emphasise that deficiencies in dialysis care are consistently found and need to be  
6  
7 considered specifically when conducting research to improve dialysis patient outcomes. This is  
8  
9 particularly relevant as existing interventions in the dialysis setting, including anaemia  
10  
11 management,[7] control of phosphorus[29] and parathyroid hormone levels,[30] dialysis dose and  
12  
13 flux,[9] and starting dialysis earlier[8] have not improved patient-wellbeing despite evaluation in  
14  
15 thousands of patients. Our respondents, consistent with the findings of others,[31-33] report  
16  
17 specifically receiving inadequate information about their illness journey and as well as their dialysis  
18  
19 treatment options. In our and other chronic diseases settings, patients report needing more  
20  
21 information about the causes and progression of their disease, disease symptoms and their impact,  
22  
23 and social and financial support.[34] [35] Patients, often due to the competing demands of daily life,  
24  
25 rely on healthcare professional to initiate discussions about care planning and not having future-  
26  
27 oriented conversations reduces patients' capacity for hope.[36] Patients perceive poor  
28  
29 communication as reflecting secrecy, misinformation and insensitivity. Subsequently, inadequate  
30  
31 information reduces the ability of patients and their families to care for themselves and induces  
32  
33 worry.[34] While education strategies increase patients' willingness to choose self-care dialysis,[23]  
34  
35 the wider effect of educational interventions in the dialysis setting that answer unmet questions  
36  
37 about disease trajectory and treatment choices with the aim of improving patient experiences of  
38  
39 end-stage kidney disease are not well understood and warrant larger-scale trials. Research in other  
40  
41 settings suggest specific interventions to improve information provision, such as training and  
42  
43 support for healthcare staff in communication and basic counselling, and overcoming barriers to  
44  
45 good communication including addressing time pressures and understaffed environments and  
46  
47 considering innovative non-written methods might be appropriate complex strategies for trials in  
48  
49 the dialysis setting.[34]

50  
51 This study indicates most patients in dialysis settings want more accurate information about their  
52  
53 prognosis, in line with experiences of other dialysis patients and those who have cancer.[36 37]  
54  
55  
56  
57  
58  
59  
60



1  
2  
3 Accurate prognostic information empowers patients;<sup>[38]</sup> when discussions about prognosis do not  
4 occur, patients and their families may (incorrectly) fear the worst. For dialysis patients in our study,  
5 the information they receive about prognosis is frequently unsatisfactory including specifically  
6 understanding their chances of receiving a kidney transplant and their survival. Physicians in other  
7 medical specialties similarly provide insufficient information about prognosis<sup>[39]</sup> and infrequently  
8 check their patients' understanding during consultations.<sup>[40]</sup> Physicians commonly find disclosing  
9 prognosis stressful and desire more training and guidance for this aspect of clinical practice.<sup>[41]</sup> Our  
10 findings suggest that meeting patients' expectations about information is an important but  
11 potentially neglected aspect of dialysis care and is consistent with data showing that patients are  
12 infrequently involved in discussions about prognosis and likelihood of transplantation.<sup>[33]</sup> The effect  
13 of increased clinician training in prognosis provision about survival and transplantation could form  
14 the basis of a testable strategy in future health services research in dialysis.

15  
16  
17  
18  
19  
20  
21  
22  
23  
24  
25  
26  
27  
28  
29  
30 The patient-centred movement in healthcare ('nothing about me without me')<sup>[42]</sup> has engendered  
31 considerable data on the issues of most importance to patients and their families to highlight the  
32 mismatch between patients' values and the outcomes routinely measured in research and clinical  
33 practice, including for patients with advanced kidney disease.<sup>[5 43]</sup> While landmark trials in  
34 nephrology over the past three decades have measured treatment effectiveness using biomarker  
35 levels and major cardiovascular events and survival, emerging data show that patients are frequently  
36 willing to forgo survival in exchange for fewer restrictions on their daily life, and prioritize  
37 collaborative research aimed at improving the way they feel, function, and survive.<sup>[5 6]</sup> In addition,  
38 contemporary studies of communication and educational strategies as well as complex healthcare  
39 service changes in dialysis have used similarly quantitative outcomes to assess treatment  
40 effectiveness, which have included urgent dialysis start, vascular access processes, and survival.<sup>[20</sup>  
41  
42  
43  
44  
45  
46  
47  
48  
49  
50  
51  
52  
53  
54  
55  
56  
57  
58  
59  
60  
61  
62  
63  
64  
65  
66  
67  
68  
69  
70  
71  
72  
73  
74  
75  
76  
77  
78  
79  
80  
81  
82  
83  
84  
85  
86  
87  
88  
89  
90  
91  
92  
93  
94  
95  
96  
97  
98  
99  
100  
101  
102  
103  
104  
105  
106  
107  
108  
109  
110  
111  
112  
113  
114  
115  
116  
117  
118  
119  
120  
121  
122  
123  
124  
125  
126  
127  
128  
129  
130  
131  
132  
133  
134  
135  
136  
137  
138  
139  
140  
141  
142  
143  
144  
145  
146  
147  
148  
149  
150  
151  
152  
153  
154  
155  
156  
157  
158  
159  
160  
161  
162  
163  
164  
165  
166  
167  
168  
169  
170  
171  
172  
173  
174  
175  
176  
177  
178  
179  
180  
181  
182  
183  
184  
185  
186  
187  
188  
189  
190  
191  
192  
193  
194  
195  
196  
197  
198  
199  
200  
201  
202  
203  
204  
205  
206  
207  
208  
209  
210  
211  
212  
213  
214  
215  
216  
217  
218  
219  
220  
221  
222  
223  
224  
225  
226  
227  
228  
229  
230  
231  
232  
233  
234  
235  
236  
237  
238  
239  
240  
241  
242  
243  
244  
245  
246  
247  
248  
249  
250  
251  
252  
253  
254  
255  
256  
257  
258  
259  
260  
261  
262  
263  
264  
265  
266  
267  
268  
269  
270  
271  
272  
273  
274  
275  
276  
277  
278  
279  
280  
281  
282  
283  
284  
285  
286  
287  
288  
289  
290  
291  
292  
293  
294  
295  
296  
297  
298  
299  
300  
301  
302  
303  
304  
305  
306  
307  
308  
309  
310  
311  
312  
313  
314  
315  
316  
317  
318  
319  
320  
321  
322  
323  
324  
325  
326  
327  
328  
329  
330  
331  
332  
333  
334  
335  
336  
337  
338  
339  
340  
341  
342  
343  
344  
345  
346  
347  
348  
349  
350  
351  
352  
353  
354  
355  
356  
357  
358  
359  
360  
361  
362  
363  
364  
365  
366  
367  
368  
369  
370  
371  
372  
373  
374  
375  
376  
377  
378  
379  
380  
381  
382  
383  
384  
385  
386  
387  
388  
389  
390  
391  
392  
393  
394  
395  
396  
397  
398  
399  
400  
401  
402  
403  
404  
405  
406  
407  
408  
409  
410  
411  
412  
413  
414  
415  
416  
417  
418  
419  
420  
421  
422  
423  
424  
425  
426  
427  
428  
429  
430  
431  
432  
433  
434  
435  
436  
437  
438  
439  
440  
441  
442  
443  
444  
445  
446  
447  
448  
449  
450  
451  
452  
453  
454  
455  
456  
457  
458  
459  
460  
461  
462  
463  
464  
465  
466  
467  
468  
469  
470  
471  
472  
473  
474  
475  
476  
477  
478  
479  
480  
481  
482  
483  
484  
485  
486  
487  
488  
489  
490  
491  
492  
493  
494  
495  
496  
497  
498  
499  
500  
501  
502  
503  
504  
505  
506  
507  
508  
509  
510  
511  
512  
513  
514  
515  
516  
517  
518  
519  
520  
521  
522  
523  
524  
525  
526  
527  
528  
529  
530  
531  
532  
533  
534  
535  
536  
537  
538  
539  
540  
541  
542  
543  
544  
545  
546  
547  
548  
549  
550  
551  
552  
553  
554  
555  
556  
557  
558  
559  
560  
561  
562  
563  
564  
565  
566  
567  
568  
569  
570  
571  
572  
573  
574  
575  
576  
577  
578  
579  
580  
581  
582  
583  
584  
585  
586  
587  
588  
589  
590  
591  
592  
593  
594  
595  
596  
597  
598  
599  
600  
601  
602  
603  
604  
605  
606  
607  
608  
609  
610  
611  
612  
613  
614  
615  
616  
617  
618  
619  
620  
621  
622  
623  
624  
625  
626  
627  
628  
629  
630  
631  
632  
633  
634  
635  
636  
637  
638  
639  
640  
641  
642  
643  
644  
645  
646  
647  
648  
649  
650  
651  
652  
653  
654  
655  
656  
657  
658  
659  
660  
661  
662  
663  
664  
665  
666  
667  
668  
669  
670  
671  
672  
673  
674  
675  
676  
677  
678  
679  
680  
681  
682  
683  
684  
685  
686  
687  
688  
689  
690  
691  
692  
693  
694  
695  
696  
697  
698  
699  
700  
701  
702  
703  
704  
705  
706  
707  
708  
709  
710  
711  
712  
713  
714  
715  
716  
717  
718  
719  
720  
721  
722  
723  
724  
725  
726  
727  
728  
729  
730  
731  
732  
733  
734  
735  
736  
737  
738  
739  
740  
741  
742  
743  
744  
745  
746  
747  
748  
749  
750  
751  
752  
753  
754  
755  
756  
757  
758  
759  
760  
761  
762  
763  
764  
765  
766  
767  
768  
769  
770  
771  
772  
773  
774  
775  
776  
777  
778  
779  
780  
781  
782  
783  
784  
785  
786  
787  
788  
789  
790  
791  
792  
793  
794  
795  
796  
797  
798  
799  
800  
801  
802  
803  
804  
805  
806  
807  
808  
809  
810  
811  
812  
813  
814  
815  
816  
817  
818  
819  
820  
821  
822  
823  
824  
825  
826  
827  
828  
829  
830  
831  
832  
833  
834  
835  
836  
837  
838  
839  
840  
841  
842  
843  
844  
845  
846  
847  
848  
849  
850  
851  
852  
853  
854  
855  
856  
857  
858  
859  
860  
861  
862  
863  
864  
865  
866  
867  
868  
869  
870  
871  
872  
873  
874  
875  
876  
877  
878  
879  
880  
881  
882  
883  
884  
885  
886  
887  
888  
889  
890  
891  
892  
893  
894  
895  
896  
897  
898  
899  
900  
901  
902  
903  
904  
905  
906  
907  
908  
909  
910  
911  
912  
913  
914  
915  
916  
917  
918  
919  
920  
921  
922  
923  
924  
925  
926  
927  
928  
929  
930  
931  
932  
933  
934  
935  
936  
937  
938  
939  
940  
941  
942  
943  
944  
945  
946  
947  
948  
949  
950  
951  
952  
953  
954  
955  
956  
957  
958  
959  
960  
961  
962  
963  
964  
965  
966  
967  
968  
969  
970  
971  
972  
973  
974  
975  
976  
977  
978  
979  
980  
981  
982  
983  
984  
985  
986  
987  
988  
989  
990  
991  
992  
993  
994  
995  
996  
997  
998  
999  
1000

The patient-centred movement in healthcare ('nothing about me without me')<sup>[42]</sup> has engendered considerable data on the issues of most importance to patients and their families to highlight the mismatch between patients' values and the outcomes routinely measured in research and clinical practice, including for patients with advanced kidney disease.<sup>[5 43]</sup> While landmark trials in nephrology over the past three decades have measured treatment effectiveness using biomarker levels and major cardiovascular events and survival, emerging data show that patients are frequently willing to forgo survival in exchange for fewer restrictions on their daily life, and prioritize collaborative research aimed at improving the way they feel, function, and survive.<sup>[5 6]</sup> In addition, contemporary studies of communication and educational strategies as well as complex healthcare service changes in dialysis have used similarly quantitative outcomes to assess treatment effectiveness, which have included urgent dialysis start, vascular access processes, and survival.<sup>[20 21 44]</sup> We suggest that, in line with patient-centred data, trials of communication or education for dialysis patients might consider aspects of quality of life valued by patients as key outcomes for assessing effectiveness.

1  
2  
3 Notably, patient satisfaction was largely unrelated to most clinical or demographic patient  
4 characteristics despite a large sample size and similar to other studies in the US and The  
5 Netherlands, suggesting that lower satisfaction of many aspects of dialysis care is a global patient  
6 experience. Older patients in this study rated their overall care more highly, consistent with a recent  
7 study of patient perceptions of dialysis care in The Netherlands,[18] and of studies of patient  
8 satisfaction across health services more generally,[45 46] despite evidence that older patients may  
9 actually receive lower quality care.[47] In contrast, depressive symptoms markedly reduced  
10 satisfaction in this study, (even when controlling for markers of health status and comorbidity);  
11 similar findings have been reported in other settings.[48] Those with depressive symptoms  
12 voluntarily ration the time they have with medical staff, which may in turn impair patient-clinician  
13 communication and serve to decrease their satisfaction with care overall.[48] Notably, in other  
14 chronic disease settings, patient satisfaction is increased in association with better patient-clinician  
15 interaction and support for patient self-management[49] and high levels of patient satisfaction for  
16 interpersonal skills, technical quality and access to care can be present in chronic illness settings  
17 such as diabetes mellitus and rheumatoid arthritis.[50]

### 36 Limitations of the study

37  
38 Although we provide considerable satisfaction data for dialysis patients in several countries, our  
39 analysis should be interpreted in light of the study limitations. First, we did not evaluate in detail the  
40 influence of healthcare systems in which the dialysis clinics were situated (including features such as  
41 staffing-levels[51] or number of beds[52]) on patient satisfaction, although we did find an  
42 association between overall satisfaction and global clinical performance. While interpersonal  
43 relations with healthcare workers are the most frequently mentioned by patients when asked to rate  
44 their care, contextual factors relating to conditions of medical services are also described commonly  
45 by patients and often lead to negative comments about healthcare.[53] Second, we took a  
46 quantitative approach to assessing patients' perceptions, which may be suboptimal for  
47 understanding the full range of feelings, values and experiences of receiving dialysis care. In  
48  
49  
50  
51  
52  
53  
54  
55  
56  
57  
58  
59  
60

1  
2  
3 addition, satisfaction and dissatisfaction may not simply be alternative ends of a single spectrum of  
4  
5 perception and may in fact exist side-by-side within a patient experience of care.[54] Third, we did  
6  
7 not capture satisfaction with a specific healthcare event and surveyed patients who had been  
8  
9 treated with dialysis for 3 years on average. The potential lag between pivotal patient experiences  
10  
11 and the survey may have introduced recall bias.[55] Fourth, we did not capture longitudinal data to  
12  
13 determine any association between perceptions of care and health-related behaviour and outcomes  
14  
15 including healthcare utilization, quality of life, or survival. Finally, the findings in this study may not  
16  
17 be applicable to other dialysis settings including peritoneal dialysis or home-based haemodialysis  
18  
19 care and regional settings outside our survey countries including many USA, European and United  
20  
21 Kingdom dialysis settings. In addition, the study survey predates more widespread use of  
22  
23 haemodiafiltration which may be associated with greater haemodynamic stability during dialysis  
24  
25 therapy and different levels of patient satisfaction.  
26  
27  
28  
29

### 30 **Implications of the study**

31  
32 As measures of patient experience are distinctive indicators of health care quality,[55] our analysis  
33  
34 suggests several strategies might improve care for patients in the later stages of chronic kidney  
35  
36 disease. First, patients need better information about their choices of treatment for end-stage  
37  
38 kidney disease including dialysis modalities. A recent systematic review suggests this is optimally  
39  
40 provided when the glomerular filtration rate falls below 30 ml/min per 1.73 m<sup>2</sup> and well in advance  
41  
42 of preparations for dialysis vascular access.[31] Second, formal care strategies that provide patients  
43  
44 with information about prognosis and the impact of end-stage kidney disease and its treatments on  
45  
46 their life earlier in the course of kidney disease need to be developed and assessed. Current  
47  
48 practices for assessing and discussing prognosis are manifestly inadequate[36] and our present  
49  
50 reliance on individual physicians to initiate such discussions is not meeting the needs of our patients.  
51  
52 Third, better delivery of information about dialysis from both nephrologists and dialysis staff is  
53  
54 expected by patients and greater understanding of the information that patients need and optimal  
55  
56 mode(s) of delivery may improve care.  
57  
58  
59  
60

**Conclusion**

This large study of patient satisfaction with different aspects of long-term haemodialysis care suggests that patients' needs are not being fully met. The findings suggest that meeting patient expectations about information on dialysis choices and prognosis may be critical for improving patient experiences of long-term dialysis care and can form the basis for future healthcare services research in the dialysis setting.

For peer review only

### Acknowledgements

Dr Strippoli had full access to all of the data in the study and takes responsibility for the integrity of the data and the accuracy of the data analysis. We wish to acknowledge the contribution of all patients who responded to surveys included in this analysis.

### Funding statement

This study was funded by an unrestricted educational grant from Diaverum. The sole responsibility for decisions made about study design, data collection, data management, analysis and interpretation, writing of the report, review or approval of the manuscript and the decision to submit the manuscript for publication resides with the authors, independent of the study funder.

### Competing interests

GS is Senior Vice-President of Scientific Affairs at Diaverum. JH is Senior Vice President Medical Operations - Chief Medical Officer of Diaverum. MR, CW, EC, RG, JNF, MT, ML, AB-S, and JD are employees of Diaverum. SP receives a fellowship from the Consorzio Mario Negri Sud, Italy from provided by an unrestricted educational grant from Amgen Dompé. SP is a 2012 L'Oreal UNESCO For Women in Science Australia and New Zealand Fellow.

### Ethical approval

We obtained ethics approval for the analyses of routinely collected data from the University of Sydney Human Research Ethics Committee on 27 February 2013. The authorized personnel are Allison Tong, Jonathan Craig and Giovanni Strippoli. The project number for approval was 2013/031 and included approval of the satisfaction survey, the data custodian (Diaverum) and the survey data dated January 2008.

### Author contributions

SP designed the study, interpreted data analysis, wrote the first draft and revised the paper. GdB designed the data analysis, cleaned and analyzed data, and drafted and revised the paper. JCC

1  
2  
3 assisted with study design, interpreted the data analysis, and drafted and revised the paper. AT  
4  
5 interpreted the data analysis, and drafted and revised the paper. MT assisted with data collection  
6  
7 tools, interpreted the data analysis, and drafted revised the paper. FP interpreted the data analysis,  
8  
9 and revised the paper. MR monitored data collection for the whole study, assisted with data  
10  
11 collection and cleaning, and interpreted the data analysis, and revised the paper. JH and CW  
12  
13 interpreted the data analysis, and revised the paper. EC, RG, JNF, MT, ML, AB-S, and JD assisted with  
14  
15 data collection, and interpreted the data analysis, and revised the paper. GFMS designed the study  
16  
17 and data collection tools, monitored data collection for the whole study, interpreted the data  
18  
19 analysis, and drafted and revised the paper. He is the guarantor. All authors had full access to all of  
20  
21 the data (including statistical reports and tables) in the study and can take responsibility for the  
22  
23 integrity of the data and the accuracy of the data analysis.  
24  
25  
26  
27

#### 28 **Presentation as abstract**

29  
30 This paper has previously been presented in abstract form at the American Society of Nephrology  
31  
32 Kidney Week 2013, Atlanta, as a poster communication on Friday, November 8, 2013.  
33  
34

#### 35 **Data sharing statement**

36  
37 None available  
38  
39  
40  
41  
42  
43  
44  
45  
46  
47  
48  
49  
50  
51  
52  
53  
54  
55  
56  
57  
58  
59  
60

## References

1. U S Renal Data System, USRDS 2012 Annual Data Report: Atlas of Chronic Kidney Disease and End-Stage Renal Disease in the United States, National Institutes of Health, National Institute of Diabetes and Digestive and Kidney Diseases, Bethesda, MD, 2012.
2. Evans RW, Manninen DL, Garrison LP, Jr., Hart LG, Blagg CR, Gutman RA, Hull AR, Lowrie EG. The quality of life of patients with end-stage renal disease. *New Engl J Med* 312:553-9, 1985
3. Wyld M, Morton RL, Hayen A, Howard K, Webster AC. A systematic review and meta-analysis of utility-based quality of life in chronic kidney disease treatments. *PLoS Med* 9:e1001307, 2012
4. Murtagh FE, ddington-Hall J, Higginson IJ. The prevalence of symptoms in end-stage renal disease: a systematic review. *Adv Chronic Kidney Dis* 14:82-99, 2007
5. Tong A, Sainsbury P, Carter SM, Hall B, Harris DC, Walker RG, Hawley CM, Chadban S, Craig JC. Patients' priorities for health research: focus group study of patients with chronic kidney disease. *Nephrol Dial Transplant* 23:3206-14, 2008
6. Morton RL, Snelling P, Webster AC, Rose J, Masterson R, Johnson DW, Howard K. Dialysis modality preference of patients with CKD and family caregivers: a discrete-choice study. *Am J Kidney Dis* 60:102-11, 2012
7. Phrommintikul A, Haas SJ, Elsik M, Krum H. Mortality and target haemoglobin concentrations in anaemic patients with chronic kidney disease treated with erythropoietin: a meta-analysis. *Lancet* 369:381-8, 2007
8. Cooper BA, Branley P, Bulfone L, Collins JF, Craig JC, Fraenkel MB, Harris A, Johnson DW, Kesselhut J, Li JJ, Luxton G, Pilmore A, Tiller DJ, Harris DC, Pollock CA. A randomized, controlled trial of early versus late initiation of dialysis. *N Engl J Med* 363:609-19, 2010
9. Eknoyan G, Beck GJ, Cheung AK, Daugirdas JT, Greene T, Kusek JW, Allon M, Bailey J, Delmez JA, Depner TA, Dwyer JT, Levey AS, Levin NW, Milford E, Ornt DB, Rocco MV, Schulman G, Schwab SJ, Teehan BP, Toto R. Effect of dialysis dose and membrane flux in maintenance hemodialysis. *N Engl J Med* 347:2010-9, 2002
10. Effect of cinacalcet on cardiovascular disease in patients undergoing dialysis. *N Engl J Med* 2012

- 1  
2  
3 11. Besarab A, Bolton WK, Browne JK, Egrie JC, Nissenson AR, Okamoto DM, Schwab SJ, Goodkin DA.  
4 The effects of normal as compared with low hematocrit values in patients with cardiac  
5 disease who are receiving hemodialysis and epoetin. *N Engl J Med* 339:584-90, 1998  
6  
7  
8  
9 12. Nissenson AR. Improving Outcomes for ESRD Patients: Shifting the Quality Paradigm. *Clin J Am*  
10 *Soc Nephrol* 2013  
11  
12  
13 13. Jansen DL, Heijmans MJ, Rijken M, Spreeuwenberg P, Grootendorst DC, Dekker FW, Boeschoten  
14 EW, Kaptein AA, Groenewegen PP. Illness perceptions and treatment perceptions of patients  
15 with chronic kidney disease: Different phases, different perceptions? *Br J Health Psychol*  
16 2012  
17  
18  
19  
20 14. Federal Register Centers for Medicare and Medicaid Services 42 CFR Parts 413 and 414. Medicare  
21 Program; End-Stage renal Disease Prospective Payment System and Quality Incentive  
22 Program; Ambulance fee Schedule; Durable Medical Equipment; and Competitive  
23 Acquisition of Certain Durable Medical Equipment, Prosthetics, Orthotics, and Supplies.  
24 Available at <http://www.gpo.gov/fdsys/pkg/FR-2011-11-10/pdf/2011-28606.pdf>. Accessed  
25 on November 23, 2012.  
26  
27  
28  
29  
30  
31 15. Lacson E, Jr., Wang W, Lazarus JM, Hakim RM. Hemodialysis facility-based quality-of-care  
32 indicators and facility-specific patient outcomes. *Am J Kidney Dis* 54:490-7, 2009  
33  
34  
35 16. Plantinga LC, Fink NE, Jaar BG, Sadler JH, Levin NW, Coresh J, Klag MJ, Powe NR. Attainment of  
36 clinical performance targets and improvement in clinical outcomes and resource use in  
37 hemodialysis care: a prospective cohort study. *BMC Health Serv Res* 7:5, 2007  
38  
39  
40  
41 17. Vanholder R, Davenport A, Hannedouche T, Kooman J, Kribben A, Lameire N, Lonnemann G,  
42 Magner P, Mendelssohn D, Saggi SJ, Shaffer RN, Moe SM, Van Biesen W, van der Sande F,  
43 Mehrotra R. Reimbursement of dialysis: a comparison of seven countries. *J Am Soc Nephrol*  
44 23:1291-8, 2012  
45  
46  
47  
48 18. van der Veer SN, Arah OA, Visserman E, Bart HA, de Keizer NF, Abu-Hanna A, Heuveling LM,  
49 Stronks K, Jager KJ. Exploring the relationships between patient characteristics and their  
50 dialysis care experience. *Nephrol Dial Transplant* 27:4188-96, 2012  
51  
52  
53  
54 19. Rubin HR, Fink NE, Plantinga LC, Sadler JH, Kliger AS, Powe NR. Patient ratings of dialysis care  
55 with peritoneal dialysis vs hemodialysis. *JAMA* 291:697-703, 2004  
56  
57  
58  
59  
60



- 1  
2  
3 20. Devins GM, Mendelssohn DC, Barre PE, Taub K, Binik YM. Predialysis psychoeducational  
4 intervention extends survival in CKD: a 20-year follow-up. *Am J Kidney Dis* 46:1088-98, 2005  
5  
6  
7 21. Jungers P, Massy ZA, Nguyen-Khoa T, Choukroun G, Robino C, Fakhouri F, Touam M, Nguyen AT,  
8 Grunfeld JP. Longer duration of predialysis nephrological care is associated with improved  
9 long-term survival of dialysis patients. *Nephrol Dial Transplant* 16:2357-64, 2001  
10  
11  
12  
13 22. Winkelmayer WC, Owen WF, Jr., Levin R, Avorn J. A propensity analysis of late versus early  
14 nephrologist referral and mortality on dialysis. *J Am Soc Nephrol* 14:486-92, 2003  
15  
16  
17 23. Manns BJ, Taub K, Vanderstraeten C, Jones H, Mills C, Visser M, McLaughlin K. The impact of  
18 education on chronic kidney disease patients' plans to initiate dialysis with self-care dialysis:  
19 a randomized trial. *Kidney Int* 68:1777-83, 2005  
20  
21  
22  
23 24. Bayliss E, Bhardwaja B, Ross C, Beck A, Lanese D. Multidisciplinary team care may slow the rate  
24 of decline in renal function. *Clin J Am Soc Nephrol* 6:704-10, 2011  
25  
26  
27 25. ERA-EDTA Registry. ERA-EDTA Registry Annual Report 2010. Academic Medical Center,  
28 Department of Medical Informatics, Amsterdam, The Netherlands. Available at  
29 <http://www.era-edta-reg.org/files/annualreports/pdf/AnnRep2010.pdf>. (accessed 4 March  
30 2014).  
31  
32  
33  
34 26. Rubin HR, Jenckes M, Fink NE, Meyer K, Wu AW, Bass EB, Levin N, Powe NR. Patient's view of  
35 dialysis care: development of a taxonomy and rating of importance of different aspects of  
36 care. CHOICE study. Choices for Healthy Outcomes in Caring for ESRD. *Am J Kidney Dis*  
37 30:793-801, 1997  
38  
39  
40  
41  
42 27. Snijders TAB, Bosker R. *Multilevel analysis: An introduction to basic and advanced multilevel*  
43 *modeling*. London: Sage, 1999.  
44  
45  
46 28. Sullivan LM, Dukes KA, Losina E. Tutorial in biostatistics. An introduction to hierarchical linear  
47 modelling. *Stat Med* 18:855-88, 1999  
48  
49  
50 29. Suki WN, Zabaneh R, Cangiano JL, Reed J, Fischer D, Garrett L, Ling BN, Chasan-Taber S, Dillon  
51 MA, Blair AT, Burke SK. Effects of sevelamer and calcium-based phosphate binders on  
52 mortality in hemodialysis patients. *Kidney Int* 72:1130-7, 2007  
53  
54  
55  
56  
57  
58  
59  
60

- 1  
2  
3 30. Palmer SC, Nistor I, Craig JC, Pellegrini F, Messa P, Tonelli M, Covic A, Strippoli GF. Cinacalcet in  
4 patients with chronic kidney disease: a cumulative meta-analysis of randomized controlled  
5 trials. *PLoS Med* 10:e1001436, 2013  
6  
7  
8  
9 31. Morton RL, Tong A, Howard K, Snelling P, Webster AC. The views of patients and carers in  
10 treatment decision making for chronic kidney disease: systematic review and thematic  
11 synthesis of qualitative studies. *BMJ* 340:c112, 2010  
12  
13  
14 32. Ormandy P. Information topics important to chronic kidney disease patients: a systematic  
15 review. *J Ren Care* 34:19-27, 2008  
16  
17  
18  
19 33. Wachterman M, Marcantonio E, Davis R, Cohen R, Waikar S, Phillips R, McCarthy E. Relationship  
20 between the prognostic expectations of seriously ill patients undergoing hemodialysis and  
21 their nephrologists. *JAMA Intern Med* 173:1206-14, 2013  
22  
23  
24 34. Selman L, Higginson IJ, Agupio G, Dinat N, Downing J, Gwyther L, Mashao T, Mmoledi K, Moll AP,  
25 Sebuyira LM, Panajatovic B, Harding R. Meeting information needs of patients with incurable  
26 progressive disease and their families in South Africa and Uganda: multicentre qualitative  
27 study. *BMJ* 338:b1326, 2009  
28  
29  
30  
31 35. Francis V, Korsch BM, Morris MJ. Gaps in doctor-patient communication. *New England Journal of*  
32 *Medicine* 280:535-40, 1969  
33  
34  
35  
36 36. Davison SN, Simpson C. Hope and advance care planning in patients with end stage renal disease:  
37 qualitative interview study. *BMJ* 333:886, 2006  
38  
39  
40 37. Hagerty RG, Butow PN, Ellis PM, Dimitry S, Tattersall MH. Communicating prognosis in cancer  
41 care: a systematic review of the literature. *Ann Oncol* 16:1005-53, 2005  
42  
43  
44 38. Mack JW, Wolfe J, Cook EF, Grier HE, Cleary PD, Weeks JC. Hope and prognostic disclosure. *J Clin*  
45 *Oncol* 25:5636-42, 2007  
46  
47  
48  
49 39. Audrey S, Abel J, Blazeby JM, Falk S, Campbell R. What oncologists tell patients about survival  
50 benefits of palliative chemotherapy and implications for informed consent: qualitative study.  
51 *BMJ* 337:a752, 2008  
52  
53  
54 40. Gattellari M, Voigt KJ, Butow PN, Tattersall MH. When the treatment goal is not cure: are cancer  
55 patients equipped to make informed decisions? *J Clin Oncol* 20:503-13, 2002  
56  
57  
58  
59  
60

- 1  
2  
3 41. Fallowfield L, Jenkins V. Communicating sad, bad, and difficult news in medicine. *The Lancet*  
4 363:312-19, 2004  
5  
6  
7 42. Barry MJ, Edgman-Levitan S. Shared Decision Making — The Pinnacle of Patient-Centered Care.  
8 *New England Journal of Medicine* 366:780-81, 2012  
9  
10  
11 43. Howell M, Tong A, Wong G, Craig JC, Howard K. Important outcomes for kidney transplant  
12 recipients: a nominal group and qualitative study. *Am J Kidney Dis* 60:186-96, 2012  
13  
14  
15 44. Levin A, Lewis M, Mortiboy P, Faber S, Hare I, Porter EC, Mendelssohn DC. Multidisciplinary  
16 predialysis programs: Quantification and limitations of their impact on patient outcomes in  
17 two Canadian settings. *American Journal of Kidney Diseases* 29:533-40, 1997  
18  
19  
20  
21 45. Bowling A. An "inverse satisfaction law"? Why don't older patients criticise health services? *J*  
22 *Epidemiol Community Health* 56:482, 2002  
23  
24  
25 46. Jaipaul CK, Rosenthal GE. Are older patients more satisfied with hospital care than younger  
26 patients? *J Gen Intern Med* 18:23-30, 2003  
27  
28  
29  
30 47. Meehan T, Fine MJ, Krumholz HM, Scinto J, Galusha D, Mockalis J, Weber G, Petrillo M, Houck P,  
31 Fine J. Quality of care, process, and outcomes in elderly patients with pneumonia. *JAMA: The*  
32 *Journal of the American Medical Association* 278:2080-84, 1997  
33  
34  
35 48. Schenker Y, Stewart A, Na B, Whooley MA. Depressive symptoms and perceived doctor-patient  
36 communication in the Heart and Soul study. *J Gen Intern Med* 24:550-6, 2009  
37  
38  
39  
40 49. Carlin CS, Christianson JB, Keenan P, Finch M. Chronic illness and patient satisfaction. *Health*  
41 *services research* 47:2250-72, 2012  
42  
43  
44 50. Bidaut-Russell M, Gabriel SE, Scott CG, Zinsmeister AR, Luthra HS, Yawn B. Determinants of  
45 patient satisfaction in chronic illness. *Arthritis and rheumatism* 47:494-500, 2002  
46  
47  
48 51. Needleman J, Buerhaus P, Mattke S, Stewart M, Zelevinsky K. Nurse-staffing levels and the  
49 quality of care in hospitals. *N Engl J Med* 346:1715-22, 2002  
50  
51  
52 52. Jha AK, Orav EJ, Zheng J, Epstein AM. Patients' perception of hospital care in the United States. *N*  
53 *Engl J Med* 359:1921-31, 2008  
54  
55  
56  
57  
58  
59  
60

- 1  
2  
3 53. Marcinowicz L, Chlabicz S, Grebowski R. Patient satisfaction with healthcare provided by family  
4 doctors: primary dimensions and an attempt at typology. *BMC Health Serv Res* 9:63, 2009  
5  
6  
7 54. Coyle J. Exploring the meaning of “dissatisfaction” with health care: The importance of “personal  
8 identity threat”. *Sociol Health Illn* 21:95-124, 1999  
9  
10  
11 55. Manary MP, Boulding W, Staelin R, Glickman SW. The Patient Experience and Health Outcomes.  
12 *New England Journal of Medicine* 368:201-03, 2013  
13  
14  
15  
16  
17  
18  
19  
20  
21  
22  
23  
24  
25  
26  
27  
28  
29  
30  
31  
32  
33  
34  
35  
36  
37  
38  
39  
40  
41  
42  
43  
44  
45  
46  
47  
48  
49  
50  
51  
52  
53  
54  
55  
56  
57  
58  
59  
60

For peer review only

1  
2  
3 **Figure Legends**  
4  
5  
6

7 **Figure 1** Probabilities of excellent or very good ratings of overall care by dialysis patients  
8  
9  
10  
11  
12  
13  
14  
15  
16  
17  
18  
19  
20  
21  
22  
23  
24  
25  
26  
27  
28  
29  
30  
31  
32  
33  
34  
35  
36  
37  
38  
39  
40  
41  
42  
43  
44  
45  
46  
47  
48  
49  
50  
51  
52  
53  
54  
55  
56  
57  
58  
59  
60

For peer review only

1  
2  
3  
4  
5  
6  
7  
8  
9  
10  
11  
12  
13  
14  
15  
16  
17  
18  
19  
20  
21  
22  
23  
24  
25  
26  
27  
28  
29  
30  
31  
32  
33  
34  
35  
36  
37  
38  
39  
40  
41  
42  
43  
44  
45  
46  
47  
48  
49

Figure 1 Probabilities of excellent or very good ratings of overall care by dialysis patients



## Tables

**Table 1 | Characteristics of participants who responded and those who did not respond to satisfaction survey**

| Characteristic                                                         | Complete or partial response to survey (n=2145) | No response to survey (n=603) | P value |
|------------------------------------------------------------------------|-------------------------------------------------|-------------------------------|---------|
| Age, years                                                             | 61.0 (15.5)                                     | 62.7 (14.8)                   | 0.04    |
| Gender, n (%) male                                                     | 1190 (55.5)                                     | 314 (52.1)                    | 0.14    |
| Highest school education                                               |                                                 |                               |         |
| ≤ 5 years                                                              | 847 (42.1)                                      | 238 (41.6)                    | 0.82    |
| >5 years                                                               | 1163 (57.9)                                     | 334 (58.4)                    |         |
| Depression score (Center for Epidemiological Studies-Depression Scale) |                                                 |                               |         |
| < 18                                                                   | 947 (49.6)                                      | 67 (46.7)                     | 0.25    |
| ≥ 18                                                                   | 963 (50.4)                                      | 83 (55.3)                     |         |
| Married                                                                | 1303 (60.8)                                     | 377 (62.5)                    | 0.43    |
| Living alone                                                           | 275 (13.0)                                      | 97 (16.2)                     | 0.04    |
| Distance of housing from dialysis unit                                 |                                                 |                               | 0.001   |
| < 20 kilometres                                                        | 1540 (73.1)                                     | 392 (65.8)                    |         |
| > 20 kilometres                                                        | 567 (26.9)                                      | 204 (34.2)                    |         |
| Active on waiting list for transplant                                  | 309 (14.4)                                      | 72 (11.9)                     | 0.12    |
| Previous kidney transplant                                             | 148 (6.9)                                       | 28 (4.7)                      | 0.05    |
| Employment                                                             |                                                 |                               | 0.002   |
| Employed                                                               | 331 (15.7)                                      | 76 (12.9)                     |         |
| Unemployed                                                             | 1451 (68.8)                                     | 450 (76.1)                    |         |
| Receiving benefit/pension                                              | 328 (15.6)                                      | 65 (11.0)                     |         |
| Comorbid conditions                                                    |                                                 |                               |         |
| Diabetes mellitus                                                      | 486 (23.5)                                      | 146 (25.1)                    | 0.42    |
| Hypertension                                                           | 1347 (68.5)                                     | 376 (70.3)                    | 0.65    |
| Prior cardiovascular event                                             | 472 (22.0)                                      | 124 (20.6)                    | 0.45    |
| Time on dialysis, months                                               | 37.3 (16.3-70.9)                                | 36.0 (17.0-75.7)              | 0.69    |
| Dialysis treatment time, minutes per session                           | 235.9 (20.5)                                    | 234.3 (23.5)                  | 0.35    |
| Dialysis adequacy, single pool Kt/V                                    | 1.6 (0.3)                                       | 1.5 (0.3)                     | 0.02    |
| Interdialytic weight gain, kg                                          | 2.29 (1.03)                                     | 2.37 (1.09)                   | 0.16    |
| Serum values                                                           |                                                 |                               |         |
| Haemoglobin, g/l                                                       | 11.0 (1.4)                                      | 11.0 (1.3)                    | 0.31    |
| Systolic blood pressure, mmHg                                          | 130.0 (18.0)                                    | 128.4 (17.3)                  | 0.07    |
| Serum albumin, g/l                                                     | 3.9 (0.5)                                       | 3.9 (0.5)                     | 0.73    |
| Serum phosphorus, mmol/l                                               | 4.6 (1.4)                                       | 4.6 (1.4)                     | 0.69    |
| Serum ferritin, µg/l                                                   | 430 (242-660)                                   | 409 (242-672)                 | 0.71    |
| Serum parathyroid hormone, pmol/l                                      | 282 (162-481)                                   | 287 (167-530)                 | 0.23    |
| Antidepressant medication                                              | 113 (5.3)                                       | 26 (4.3)                      | 0.34    |
| Anxiolytic medication                                                  | 291 (13.6)                                      | 86 (14.3)                     | 0.66    |
| Country                                                                |                                                 |                               | <0.0001 |
| Argentina                                                              | 549 (81.9)                                      | 121 (18.1)                    |         |
| Hungary                                                                | 556 (81.4)                                      | 127 (18.6)                    |         |
| Italy                                                                  | 648 (73.6)                                      | 232 (26.4)                    |         |
| Poland                                                                 | 355 (74.4)                                      | 122 (25.6)                    |         |
| Portugal                                                               | 37 (97.4)                                       | 1 (2.6)                       |         |

Data are expressed as mean (SD), number (%), or median (25<sup>th</sup> percentile, 75<sup>th</sup> percentile). Kt/V refers to the clearance of urea and is a measure of the amount of dialysis received.

**Table 2 | Proportion of patients who gave an excellent rating to overall haemodialysis care according to patient characteristics**

| Characteristic                                            | Excellent rating<br>N (%) | Other rating<br>N (%) | Unadjusted odds<br>ratio | Clustering and case-<br>mix adjusted odds<br>ratio |
|-----------------------------------------------------------|---------------------------|-----------------------|--------------------------|----------------------------------------------------|
| Age                                                       |                           |                       |                          |                                                    |
| 18-49 years                                               | 183 (19.1)                | 300 (28.1)            | 1.00 (reference)         | 1.00                                               |
| 50-59 years                                               | 146 (15.3)                | 215 (20.1)            | 1.11 (0.84-1.47)         | 1.01 (0.70-1.44)                                   |
| 59-69 years                                               | 221 (23.1)                | 218 (20.4)            | 1.66 (1.28-2.16)         | 1.18 (0.82-1.69)                                   |
| ≥70 years                                                 | 406 (42.5)                | 335 (31.4)            | 1.99 (1.57-2.51)         | 1.44 (1.01-2.04)                                   |
| Male gender                                               | 466 (46.1)                | 483 (43.1)            | 1.13 (0.95-1.34)         | 1.12 (0.88-1.44)                                   |
| Highest school education                                  |                           |                       |                          |                                                    |
| ≤5 years                                                  | 465 (49.0)                | 375 (35.8)            | 1.72 (1.44-2.06)         | 0.95 (0.74-1.21)                                   |
| >5 years                                                  | 485 (51.1)                | 673 (64.2)            | 1.00 (reference)         | 1.00                                               |
| Occupational status                                       |                           |                       |                          |                                                    |
| Employed                                                  | 120 (12.0)                | 209 (19.0)            | 0.59 (0.46-0.75)         | 0.79 (0.56-1.12)                                   |
| Unemployed or pension                                     | 876 (88.0)                | 893 (81.0)            | 1.00                     | 1.00                                               |
| Married                                                   | 601 (59.4)                | 693 (61.8)            | 0.91 (0.76-1.08)         | 0.86 (0.67-1.10)                                   |
| Distance of housing from dialysis unit                    |                           |                       |                          |                                                    |
| <20 kilometres                                            | 741 (73.9)                | 792 (72.5)            | 1.00                     | 1.00                                               |
| >20 kilometres                                            | 262 (26.1)                | 300 (27.5)            | 0.93 (0.77-1.13)         | 1.18 (0.91-1.54)                                   |
| Waiting list for kidney transplant                        | 131 (13.0)                | 176 (15.7)            | 0.80 (0.63-1.02)         | 0.80 (0.56-1.14)                                   |
| Comorbid conditions                                       |                           |                       |                          |                                                    |
| Diabetes mellitus                                         | 249 (25.4)                | 233 (21.6)            | 1.24 (1.01-1.52)         | 1.38 (0.78-2.46)                                   |
| Prior cardiovascular event                                | 248 (24.5)                | 220 (19.6)            | 1.33 (1.08-1.63)         | 0.89 (0.63-1.26)                                   |
| Center for Epidemiological Studies-Depression Scale score |                           |                       |                          |                                                    |
| <18                                                       | 472 (52.5)                | 472 (47.2)            | 1.00 (reference)         | 1.00 (reference)                                   |
| ≥18                                                       | 427 (47.5)                | 527 (52.8)            | 0.81 (0.68-0.97)         | 0.56 (0.44-0.71)                                   |
| Dialysis adequacy, <i>single pool Kt/V</i>                |                           |                       |                          |                                                    |
| <1.4                                                      | 202 (20.6)                | 245 (22.2)            | 1.00 (reference)         | 1.00                                               |
| ≥1.4                                                      | 778 (79.4)                | 856 (77.8)            | 1.10 (0.89-1.36)         | 1.11 (0.83-1.49)                                   |
| Serum phosphorus, mmol/l                                  |                           |                       |                          |                                                    |
| <1.45                                                     | 516 (51.5)                | 509 (45.9)            | 1.00 (reference)         | 1.00                                               |
| ≥1.45                                                     | 486 (48.5)                | 601 (54.1)            | 0.80 (0.67-0.95)         | 0.96 (0.76-1.23)                                   |
| Haemoglobin, g/l                                          |                           |                       |                          |                                                    |
| <110                                                      | 476 (47.6)                | 537 (48.2)            | 1.00 (reference)         | 1.00                                               |
| ≥110                                                      | 525 (52.4)                | 578 (51.8)            | 1.02 (0.86-1.22)         | 0.90 (0.71-1.14)                                   |
| Albumin, g/dl                                             |                           |                       |                          |                                                    |
| <3.8                                                      | 371 (37.8)                | 369 (33.7)            | 1.00 (reference)         | 1.00                                               |
| 3.8-4.0                                                   | 277 (28.2)                | 324 (29.6)            | 0.85 (0.69-1.05)         | 1.07 (0.80-1.42)                                   |
| ≥4.1                                                      | 333 (33.9)                | 401 (36.6)            | 0.83 (0.67-1.01)         | 0.78 (0.58-1.05)                                   |
| Systolic blood pressure, mmHg                             |                           |                       |                          |                                                    |
| ≤120                                                      | 270 (27.2)                | 353 (32.1)            | 1.00 (reference)         | 1.00                                               |
| 121-140                                                   | 404 (40.6)                | 441 (40.0)            | 1.20 (0.97-1.47)         | 0.89 (0.67-1.19)                                   |
| ≥140                                                      | 320 (32.2)                | 307 (27.9)            | 1.36 (1.09-1.70)         | 1.03 (0.76-1.40)                                   |
| Country                                                   |                           |                       |                          |                                                    |
| Poland                                                    | 48 (4.8)                  | 303 (27.0)            | 0.09 (0.07-0.13)         | -                                                  |
| Argentina                                                 | 172 (17.0)                | 372 (33.2)            | 0.28 (0.22-0.35)         | -                                                  |
| Italy                                                     | 405 (40.1)                | 242 (21.6)            | 1.00 (reference)         | -                                                  |
| Hungary                                                   | 355 (35.1)                | 198 (17.7)            | 1.07 (0.85-1.36)         | -                                                  |
| Portugal                                                  | 31 (3.1)                  | 6 (0.5)               | 3.09 (1.27-7.51)         | -                                                  |

Clustering and case-mix adjusted model controlled for age, gender, education level, occupational status, marital status, distance from dialysis centre, activity on transplant waiting list, comorbid conditions (diabetes, hypertension, cardiovascular event) depression score, cause of end-stage kidney disease, duration of dialysis per session and dialysis dose, dialysis adequacy (Kt/V), serum values (haemoglobin; phosphorus) and country.



1  
2  
3  
4  
5  
6  
7  
8  
9  
10  
11  
12  
13  
14  
15  
16  
17  
18  
19  
20  
21  
22  
23  
24  
25  
26  
27  
28  
29  
30  
31  
32  
33  
34  
35  
36  
37  
38  
39  
40  
41  
42  
43  
44  
45  
46  
47  
48  
49  
50  
51  
52  
53  
54  
55  
56  
57  
58  
59  
60

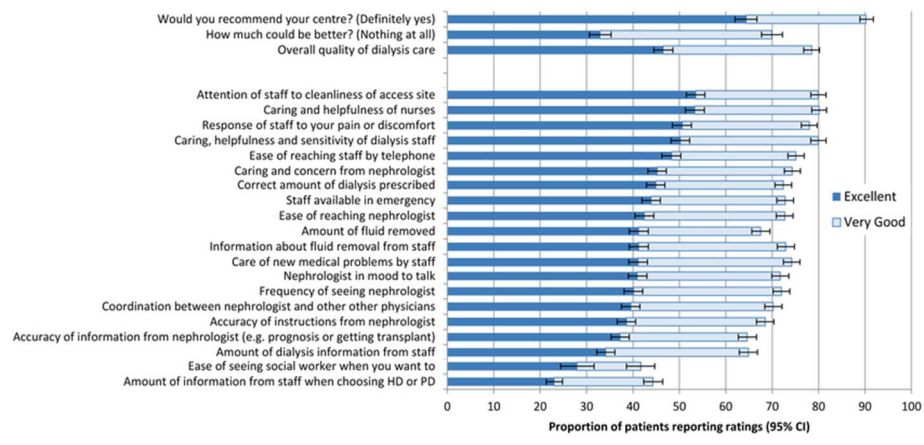

Probabilities of excellent or very good ratings of overall care by dialysis patients  
78x35mm (300 x 300 DPI)

Peer review only

# Supplement

## eAppendix CHOICE Satisfaction Questionnaire

We want your opinion on the quality of the medical care you receive for your dialysis treatment. Please choose the answer than best reflects your views for each of the questions below. There is no right or wrong answer. We want your opinions.

| Please rate the following (Fill in the corresponding circle on each line): |                                                                                                               | Poor                                                                                                                                                                           | Fair                  | Good                  | Very Good             | Excellent             | Not Applicable to me  |
|----------------------------------------------------------------------------|---------------------------------------------------------------------------------------------------------------|--------------------------------------------------------------------------------------------------------------------------------------------------------------------------------|-----------------------|-----------------------|-----------------------|-----------------------|-----------------------|
| 1.                                                                         | How easy is it to reach the kidney doctor                                                                     | <input type="radio"/>                                                                                                                                                          | <input type="radio"/> | <input type="radio"/> | <input type="radio"/> | <input type="radio"/> | <input type="radio"/> |
| 2.                                                                         | The nephrologist's caring and concern about you                                                               | <input type="radio"/>                                                                                                                                                          | <input type="radio"/> | <input type="radio"/> | <input type="radio"/> | <input type="radio"/> | <input type="radio"/> |
| 3.                                                                         | How often the nephrologist sees you                                                                           | <input type="radio"/>                                                                                                                                                          | <input type="radio"/> | <input type="radio"/> | <input type="radio"/> | <input type="radio"/> | <input type="radio"/> |
| 4.                                                                         | How often the nephrologist is in a mood to talk with patients                                                 | <input type="radio"/>                                                                                                                                                          | <input type="radio"/> | <input type="radio"/> | <input type="radio"/> | <input type="radio"/> | <input type="radio"/> |
| 5.                                                                         | How accurate the nephrologist is about information like your chance of doing well or of getting a transplant  | <input type="radio"/>                                                                                                                                                          | <input type="radio"/> | <input type="radio"/> | <input type="radio"/> | <input type="radio"/> | <input type="radio"/> |
| 6.                                                                         | How accurate the nephrologist's instructions to you are                                                       | <input type="radio"/>                                                                                                                                                          | <input type="radio"/> | <input type="radio"/> | <input type="radio"/> | <input type="radio"/> | <input type="radio"/> |
| 7.                                                                         | How well the nephrologist makes sure the amount of dialysis you are getting is just right for you             | <input type="radio"/>                                                                                                                                                          | <input type="radio"/> | <input type="radio"/> | <input type="radio"/> | <input type="radio"/> | <input type="radio"/> |
| 8.                                                                         | How well the nephrologist and other doctors you see coordinate with each other                                | <input type="radio"/>                                                                                                                                                          | <input type="radio"/> | <input type="radio"/> | <input type="radio"/> | <input type="radio"/> | <input type="radio"/> |
| 9.                                                                         | How easy it is to reach your dialysis center by telephone                                                     | <input type="radio"/>                                                                                                                                                          | <input type="radio"/> | <input type="radio"/> | <input type="radio"/> | <input type="radio"/> | <input type="radio"/> |
| 10.                                                                        | How much attention doctors and nurses pay to cleanliness when they work with your IV or access site           | <input type="radio"/>                                                                                                                                                          | <input type="radio"/> | <input type="radio"/> | <input type="radio"/> | <input type="radio"/> | <input type="radio"/> |
| 11.                                                                        | How helpful and caring the nurses at your dialysis center are                                                 | <input type="radio"/>                                                                                                                                                          | <input type="radio"/> | <input type="radio"/> | <input type="radio"/> | <input type="radio"/> | <input type="radio"/> |
| 12.                                                                        | How sensitive, helpful, and caring your dialysis center staff are                                             | <input type="radio"/>                                                                                                                                                          | <input type="radio"/> | <input type="radio"/> | <input type="radio"/> | <input type="radio"/> | <input type="radio"/> |
| 13.                                                                        | How well your dialysis center staff responds when you say you are in pain or uncomfortable                    | <input type="radio"/>                                                                                                                                                          | <input type="radio"/> | <input type="radio"/> | <input type="radio"/> | <input type="radio"/> | <input type="radio"/> |
| 14.                                                                        | The number and kind of staff available to help you in an emergency                                            | <input type="radio"/>                                                                                                                                                          | <input type="radio"/> | <input type="radio"/> | <input type="radio"/> | <input type="radio"/> | <input type="radio"/> |
| 15.                                                                        | How much information you are being given about dialysis                                                       | <input type="radio"/>                                                                                                                                                          | <input type="radio"/> | <input type="radio"/> | <input type="radio"/> | <input type="radio"/> | <input type="radio"/> |
| 16.                                                                        | The amount of information you are being given to help you choose between hemodialysis and peritoneal dialysis | <input type="radio"/>                                                                                                                                                          | <input type="radio"/> | <input type="radio"/> | <input type="radio"/> | <input type="radio"/> | <input type="radio"/> |
| 17.                                                                        | How much information you are given about the amount of fluid to take in and take off                          | <input type="radio"/>                                                                                                                                                          | <input type="radio"/> | <input type="radio"/> | <input type="radio"/> | <input type="radio"/> | <input type="radio"/> |
| 18.                                                                        | How much fluid is removed during your dialysis session                                                        | <input type="radio"/>                                                                                                                                                          | <input type="radio"/> | <input type="radio"/> | <input type="radio"/> | <input type="radio"/> | <input type="radio"/> |
| 19.                                                                        | How easy it is to meet the social worker when you want to                                                     | <input type="radio"/>                                                                                                                                                          | <input type="radio"/> | <input type="radio"/> | <input type="radio"/> | <input type="radio"/> | <input type="radio"/> |
| 20.                                                                        | How well new medical problems taken care of by the dialysis center staff when they arise                      | <input type="radio"/>                                                                                                                                                          | <input type="radio"/> | <input type="radio"/> | <input type="radio"/> | <input type="radio"/> | <input type="radio"/> |
| 21.                                                                        | How would you rate the quality of care you have received as a dialysis patient, overall                       | <input type="radio"/>                                                                                                                                                          | <input type="radio"/> | <input type="radio"/> | <input type="radio"/> | <input type="radio"/> | <input type="radio"/> |
| 22.                                                                        | Thinking about your dialysis care overall, how much could be better                                           | <input type="radio"/> Many things <input type="radio"/> A few things <input type="radio"/> One or two things <input type="radio"/> Nothing could be better at all              |                       |                       |                       |                       |                       |
| 22.                                                                        | Would you recommend your dialysis center to a friend or relative who needs dialysis                           | <input type="radio"/> Definitely not <input type="radio"/> Probably not <input type="radio"/> Not sure <input type="radio"/> Probably yes <input type="radio"/> Definitely yes |                       |                       |                       |                       |                       |

**Thank you for completing this survey. Please put your survey in the envelope, seal it, and give it to the clinic coordinator.**

eTable 1 | Percentage of patients who rated care as excellent overall and according to country

| Satisfaction Domain and Item            | Overall cohort | Italy      | Argentina  | Hungary    | Poland    | Portugal  |
|-----------------------------------------|----------------|------------|------------|------------|-----------|-----------|
| <b>Nephrologist</b>                     |                |            |            |            |           |           |
| 1. Ease of reaching                     | 983/2316       | 375 (54.1) | 159 (26.3) | 351 (58.7) | 69 (18.0) | 29 (78.4) |
| 2. Caring and concern                   | 1049/2321      | 426 (61.2) | 151 (24.9) | 365 (61.0) | 76 (19.8) | 31 (83.8) |
| 3. Frequency of seeing                  | 928 /2316      | 395 (56.8) | 121 (20.0) | 320 (53.8) | 64 (16.7) | 28 (75.7) |
| 4. In mood to talk                      | 945/2308       | 414 (59.8) | 121 (21.8) | 297 (50.0) | 74 (19.3) | 29 (78.4) |
| 5. Accuracy of information              | 851/2286       | 343 (50.4) | 105 (17.4) | 331 (56.5) | 45 (11.8) | 27 (73.0) |
| 6. Accuracy of instructions             | 889/2302       | 359 (52.3) | 111 (18.4) | 340 (57.4) | 52 (13.6) | 27 (75.0) |
| 7. Correct amount of dialysis           | 1030/2295      | 479 (68.6) | 100 (17.0) | 375 (63.6) | 48 (12.6) | 28 (75.7) |
| 8. Coordination with other physicians   | 909/2302       | 397 (57.2) | 147 (24.5) | 285 (48.4) | 53 (13.8) | 27 (73.0) |
| <b>Dialysis Staff</b>                   |                |            |            |            |           |           |
| 9. Ease of reaching staff               | 1110/2299      | 458 (66.1) | 143 (23.9) | 428 (72.4) | 51 (13.4) | 30 (81.1) |
| 10. Attention to cleanliness of access  | 1235/2308      | 487 (69.9) | 196 (23.7) | 452 (76.2) | 69 (18.1) | 31 (83.8) |
| 11. Caring of nurses                    | 1238/2321      | 470 (67.2) | 214 (35.3) | 449 (75.3) | 74 (19.3) | 3 (83.8)  |
| 12. Caring of staff                     | 1166/2322      | 442 (63.1) | 193 (31.8) | 423 (71.1) | 77 (20.2) | 31 (83.8) |
| 13. Response to pain                    | 1162/2298      | 492 (71.1) | 192 (32.1) | 408 (68.5) | 40 (10.7) | 30 (81.1) |
| 14. Staff available in emergency        | 1001/2281      | 448 (64.9) | 116 (19.6) | 375 (63.7) | 33 (8.9)  | 29 (78.4) |
| 15. Amount of dialysis information      | 776/2273       | 303 (44.4) | 90 (15.3)  | 321 (53.8) | 34 (9.2)  | 28 (75.7) |
| 16. Amount of information on            | 513/2230       | 175 (26.5) | 70 (12.0)  | 229 (39.5) | 12 (3.3)  | 27 (73.0) |
| 17. Information about fluid removal     | 1041/2268      | 441 (63.4) | 127 (21.8) | 412 (70.0) | 35 (9.6)  | 26 (70.3) |
| 18. Amount of fluid removed             | 917/2226       | 421 (60.7) | 80 (14.3)  | 367 (62.3) | 22 (6.3)  | 27 (73.0) |
| 19. Ease of seeing social worker*       | 162/585        | -          | -          | 162 (27.7) | -         | -         |
| 20. New medical problems                | 927/2256       | 375 (54.6) | 148 (25.7) | 355 (60.0) | 20 (5.5)  | 29 (78.4) |
| <b>Overall Ratings</b>                  |                |            |            |            |           |           |
| 21. Quality of dialysis care            | 1057/2271      | 424 (61.2) | 177 (30.3) | 375 (63.5) | 50 (13.7) | 31 (83.8) |
| 22. How much could be better? **        | 518/1575       | -          | 162 (27.7) | 201 (34.1) | 148       | 7 (20.6)  |
| 23. Would you recommend your center? ** | 1022/1587      | -          | 330 (56.5) | 433 (73.9) | 223       | 36 (97.3) |

\*Question 19 was present only in the Hungarian version of the survey

\*\*Questions 22 and 23 were not included in the Italian version of the questionnaire

**eTable 2 | Key performance indicators**

---

**Key performance indicators**

---

Kt/V  $\geq$  1.4Albumin  $\geq$  35 g/lnPCR  $\geq$  1.0 g/kg/dayHaemoglobin  $\geq$  10.0 and  $\leq$  12.0 g/dlFerritin  $\geq$  200 and  $\leq$  500 ng/mlPhosphorus  $\geq$ 3.5 and  $\leq$ 5.5 mg/dlCalcium by phosphorus product  $<$ 55 mg<sup>2</sup>/dl<sup>2</sup>Parathyroid hormone  $\geq$ 150 pg/ml and  $\leq$  300 pg/mlMean arterial pressure  $<$ 105 mmHgInterdialytic weight gain  $<$ 4 %Arteriovenous fistula

---

**eTable 3 | Percentage of patients who reported that nothing about care could be better according to patient and centre characteristics**

| Characteristic                                            | Excellent rating<br>N (%) | Other rating<br>N (%) | Unadjusted<br>odds ratio | Clustering and<br>case-mix<br>adjusted odds<br>ratio |
|-----------------------------------------------------------|---------------------------|-----------------------|--------------------------|------------------------------------------------------|
| Age                                                       |                           |                       |                          |                                                      |
| 18-49 years                                               | 91 (19.6)                 | 293 (31.1)            | 1.00 (reference)         | 1.00                                                 |
| 50-59 years                                               | 79 (17.0)                 | 205 (21.8)            | 1.24 (0.87-1.76)         | 1.14 (0.76-1.71)                                     |
| 59-69 years                                               | 112 (24.1)                | 208 (22.1)            | 1.73 (1.25-2.41)         | 1.40 (0.94-2.10)                                     |
| ≥70 years                                                 | 182 (39.2)                | 235 (25.0)            | 2.49 (1.84-3.38)         | 2.20 (1.47-3.31)                                     |
| Male gender                                               | 232 (47.7)                | 431 (43.5)            | 1.19 (0.95-1.48)         | 1.29 (0.97-1.72)                                     |
| Highest school education                                  |                           |                       |                          |                                                      |
| ≤5 years                                                  | 176 (40.3)                | 334 (36.1)            | 1.20 (0.95-1.51)         | 1.17 (0.87-1.57)                                     |
| >5 years                                                  | 261 (59.7)                | 592 (63.9)            | 1.00 (reference)         | 1.00                                                 |
| Occupational status                                       |                           |                       |                          |                                                      |
| Employed                                                  | 65 (13.7)                 | 181 (18.6)            | 0.70 (0.51-0.95)         | 0.86 (0.57-1.30)                                     |
| Unemployed or pension                                     | 409 (86.3)                | 792 (81.4)            | 1.00                     | 1.00                                                 |
| Married                                                   | 289 (59.5)                | 583 (58.8)            | 1.03 (0.82-1.28)         | 1.19 (0.90-1.58)                                     |
| Distance of housing from dialysis unit                    |                           |                       |                          |                                                      |
| <20 kilometres                                            | 302 (64.5)                | 695 (71.4)            | 1.00                     | 1.00                                                 |
| >20 kilometres                                            | 166 (35.5)                | 279 (28.6)            | 1.37 (1.08-1.73)         | 1.39 (1.04-1.85)                                     |
| Waiting list for kidney transplant                        | 66 (13.6)                 | 170 (17.2)            | 0.76 (0.56-1.03)         | 1.11 (0.75-1.65)                                     |
| Comorbid conditions                                       |                           |                       |                          |                                                      |
| Diabetes mellitus                                         | 122 (26.1)                | 226 (23.7)            | 1.13 (0.88-1.46)         | 1.24 (0.67-2.30)                                     |
| Prior cardiovascular event                                | 110 (22.6)                | 213 (21.5)            | 1.07 (0.82-1.39)         | 0.94 (0.67-1.31)                                     |
| Center for Epidemiological Studies-Depression Scale score |                           |                       |                          |                                                      |
| <18                                                       | 243 (54.1)                | 448 (49.0)            | 1.00 (reference)         | 1.00 (reference)                                     |
| ≥18                                                       | 206 (45.9)                | 467 (51.0)            | 0.81 (0.65-1.02)         | 0.81 (0.62-1.06)                                     |
| Dialysis adequacy, <i>single pool</i><br><i>Kt/V</i>      |                           |                       |                          |                                                      |
| <1.4                                                      | 94 (19.7)                 | 202 (20.8)            | 1.00 (reference)         | 1.00                                                 |
| ≥1.4                                                      | 384 (80.3)                | 769 (79.2)            | 1.07 (0.82-1.41)         | 1.18 (0.82-1.69)                                     |
| Serum phosphorus, mmol/l                                  |                           |                       |                          |                                                      |
| <1.45                                                     | 258 (53.4)                | 510 (52.0)            | 1.00 (reference)         | 1.00                                                 |
| ≥1.45                                                     | 225 (46.6)                | 471 (48.0)            | 0.94 (0.76-1.17)         | 1.05 (0.79-1.39)                                     |
| Haemoglobin, g/l                                          |                           |                       |                          |                                                      |
| <110                                                      | 229 (47.3)                | 530 (53.8)            | 1.00 (reference)         | 1.00                                                 |
| ≥110                                                      | 255 (52.7)                | 455 (46.2)            | 1.30 (1.04-1.61)         | 1.27 (0.96-1.66)                                     |
| Albumin, g/dl                                             |                           |                       |                          |                                                      |
| <3.8                                                      | 161 (33.5)                | 316 (32.5)            | 1.00 (reference)         | 1.00                                                 |
| 3.8-4.0                                                   | 145 (30.2)                | 281 (28.9)            | 1.01 (0.77-1.33)         | 0.91 (0.65-1.28)                                     |
| ≥4.1                                                      | 175 (36.4)                | 374 (38.5)            | 0.92 (0.71-1.19)         | 0.81 (0.57-1.15)                                     |
| Systolic blood pressure, mmHg                             |                           |                       |                          |                                                      |
| ≤120                                                      | 156 (32.5)                | 300 (31.0)            | 1.00 (reference)         | 1.00                                                 |
| 121-140                                                   | 193 (40.2)                | 373 (38.5)            | 1.00 (0.77-1.29)         | 0.98 (0.71-1.36)                                     |
| ≥140                                                      | 131 (27.3)                | 296 (30.6)            | 0.85 (0.64-1.13)         | 0.88 (0.62-1.26)                                     |
| Country                                                   |                           |                       |                          |                                                      |
| Italy                                                     | -                         | -                     | -                        | -                                                    |
| Portugal                                                  | 7 (1.4)                   | 27 (2.7)              | 0.69 (0.29-1.61)         | -                                                    |
| Argentina                                                 | 148 (30.4)                | 392 (39.6)            | 1.00 (reference)         | -                                                    |
| Hungary                                                   | 188 (38.7)                | 364 (36.7)            | 1.37 (1.06-1.77)         | -                                                    |
| Poland                                                    | 143 (29.4)                | 208 (21.0)            | 1.82 (1.37-2.42)         | -                                                    |

Clustering and case-mix adjusted model controlled for age, gender, education level, occupational status, marital status, distance from dialysis centre, activity on transplant waiting list, comorbid conditions (diabetes, hypertension, cardiovascular event) depression score, cause of end-stage kidney disease, duration of dialysis per session and dialysis dose, dialysis adequacy (Kt/V), serum values (haemoglobin; phosphorus) and country.

**eTable 4 | Percentage of patients who would recommend their dialysis center to a friend or relative who needed dialysis care according to patient and center characteristics**

| Characteristic                                            | Excellent rating<br>N (%) | Other rating<br>N (%) | Unadjusted<br>odds ratio | Clustering and<br>case-mix<br>adjusted odds<br>ratio |
|-----------------------------------------------------------|---------------------------|-----------------------|--------------------------|------------------------------------------------------|
| Age                                                       |                           |                       |                          |                                                      |
| 18-49 years                                               | 216 (23.4)                | 170 (34.8)            | 1.00                     | 1.00                                                 |
| 50-59 years                                               | 191 (20.7)                | 96 (19.5)             | 1.57 (1.14-2.15)         | 1.34 (0.93-1.94)                                     |
| 59-69 years                                               | 222 (24.1)                | 99 (20.2)             | 1.76 (1.29-2.41)         | 1.36 (0.93-1.99)                                     |
| ≥70 years                                                 | 294 (31.8)                | 124 (25.4)            | 1.87 (1.40-2.50)         | 1.84 (1.24-2.74)                                     |
| Male                                                      | 438 (45.2)                | 229 (44.5)            | 1.03 (0.83-1.28)         | 0.97 (0.73-1.28)                                     |
| Highest school education                                  |                           |                       |                          |                                                      |
| ≤5 years                                                  | 363 (40.6)                | 151 (31.7)            | 1.47 (1.16-1.86)         | 1.15 (0.86-1.54)                                     |
| >5 years                                                  | 532 (59.4)                | 325 (68.3)            | 1.00                     | 1.00                                                 |
| Occupational status                                       |                           |                       |                          |                                                      |
| Employed                                                  | 155 (16.3)                | 90 (17.9)             | 0.89 (0.67-1.19)         | 1.17 (0.81-1.68)                                     |
| Unemployed or pension                                     | 796 (83.7)                | 413 (82.1)            | 1.00                     | 1.00                                                 |
| Married                                                   | 581 (60.0)                | 299 (58.1)            |                          | 1.06 (0.81-1.39)                                     |
| Distance of housing from dialysis unit                    |                           |                       |                          |                                                      |
| <20 kilometres                                            | 633 (66.8)                | 370 (73.6)            | 1.00                     | 1.00                                                 |
| >20 kilometres                                            | 314 (33.2)                | 133 (26.4)            | 1.38 (1.09-1.75)         | 1.37 (1.03-1.83)                                     |
| Waiting list for kidney transplant                        | 152 (15.7)                | 86 (16.7)             | 0.93 (0.70-1.24)         | 1.01 (0.70-1.45)                                     |
| Comorbid conditions                                       |                           |                       |                          |                                                      |
| Diabetes mellitus                                         | 240 (25.8)                | 112 (22.5)            | 1.20 (0.93-1.55)         | 1.52 (0.78-2.94)                                     |
| Prior cardiovascular event                                | 234 (24.2)                | 92 (17.9)             | 1.46 (1.12-1.92)         | 1.21 (0.85-1.71)                                     |
| Center for Epidemiological Studies-Depression Scale score |                           |                       |                          |                                                      |
| <18                                                       | 475 (53.1)                | 214 (45.2)            | 1.00                     | 1.00                                                 |
| ≥18                                                       | 420 (46.9)                | 260 (54.9)            | 0.73 (0.58-0.91)         | 0.67 (0.51-0.87)                                     |
| Dialysis adequacy, <i>single pool Kt/V</i>                |                           |                       |                          |                                                      |
| <1.4                                                      | 181 (19.13)               | 114 (22.4)            | 1.00                     | 1.00                                                 |
| ≥1.4                                                      | 765 (80.9)                | 395 (77.6)            | 1.22 (0.94-1.59)         | 1.11 (0.79-1.56)                                     |
| Serum phosphorus, mmol/l                                  |                           |                       |                          |                                                      |
| <1.45                                                     | 532 (55.4)                | 242 (47.5)            | 1.00                     | 1.00                                                 |
| ≥1.45                                                     | 429 (44.6)                | 267 (52.5)            | 0.73 (0.59-0.91)         | 1.09 (0.83-1.43)                                     |
| Haemoglobin, g/l                                          |                           |                       |                          |                                                      |
| <110                                                      | 485 (50.4)                | 276 (53.8)            | 1.00                     | 1.00                                                 |
| ≥110                                                      | 477 (59.6)                | 237 (46.2)            | 1.15 (0.92-1.42)         | 0.95 (0.73-1.24)                                     |
| Albumin, g/dl                                             |                           |                       |                          |                                                      |
| <3.8                                                      | 294 (30.9)                | 186 (36.7)            | 1.00                     | 1.00                                                 |
| 3.8-4.0                                                   | 287 (30.2)                | 140 (27.6)            | 1.30 (0.99-1.70)         | 1.29 (0.93-1.80)                                     |
| ≥4.1                                                      | 370 (38.9)                | 181 (35.7)            | 1.29 (1.00-1.67)         | 1.00 (0.70-1.42)                                     |
| Systolic blood pressure, mmHg                             |                           |                       |                          |                                                      |
| ≤120                                                      | 295 (31.2)                | 167 (32.8)            | 1.00                     | 1.00                                                 |
| 121-140                                                   | 381 (40.2)                | 183 (36.0)            | 1.18 (0.91-1.53)         | 0.81 (0.59-1.11)                                     |
| ≥140                                                      | 271 (28.6)                | 159 (31.2)            | 0.96 (0.73-1.27)         | 0.70 (0.50-0.99)                                     |
| Country                                                   |                           |                       |                          |                                                      |
| Italy                                                     | -                         | -                     | -                        | -                                                    |
| Portugal                                                  | 36 (3.7)                  | 1 (0.2)               | 28.23 (3.84-207.39)      | -                                                    |
| Argentina                                                 | 306 (31.6)                | 240 (46.6)            | 1.00                     | -                                                    |
| Hungary                                                   | 412 (42.5)                | 136 (26.4)            | 2.38 (1.84-3.07)         | -                                                    |
| Poland                                                    | 215 (22.2)                | 138 (26.8)            | 1.22 (0.93-1.60)         | -                                                    |

Clustering and case-mix adjusted model controlled for age, gender, education level, occupational status, marital status, distance from dialysis centre, activity on transplant waiting list, comorbid conditions (diabetes, hypertension, cardiovascular event) depression score, cause of end-stage kidney disease, duration of dialysis per session and dialysis dose, dialysis adequacy (Kt/V), serum values (haemoglobin; phosphorus) and country.

**Medical committee who participated to the study contributing to enrolment of patients**

D. Rubio, W. Labonia, M Prado, A. Vinockur, R. Papparone, C. Mato Mira, A. Peñalba, M. Gravielle, E. Mojico, M. Vargas, S. Tirado, M. Paz, G. Rodriguez, L. López, R. Beistegui, C. Bonelli, M. Arias, G. Coira, D. Florio, L. León, O. Hermida, S. Kapnik, K. García, J. De Francesco, H. Altman, F. Cravzoff, S. Mandri, K. Albert, M. Kassai, E. Kiss, D. Kosa, A. Orosz, J. Redl, G. Rozsahegyi, E. Varga, Zs. Vezekenyi, E. Zajko, A. Bereczki, L. Czikos, A. Kuti, A. Mike, K. Steiner, A. Takacs, K. Tolnai, A. Toth, I. Ven, R. Mogyorosi, E. Ligeti, N. Dambrosio, F. Dagostino, M.L. Sambati, G. Giannoccaro, V. Greco, R. Di Toro Mammarella, A. Flammini, E. Boccia, D. Di Franco, P. Steri, A. M. Murgo, M. Fici, S. La Rosa, G. Montalto, M. Falco, F. Grisafi, S. Pagano, S. Amarù, D. Rallo, A. Conticello, G. Martucci, N. Sanfilippo, L. Leonardo, V. M. Liguigli, G. Matera, C. Saturno, V. Origlia, G. Paparella, A. D'Angelo, N. Falsitta, G. De Leo, S. Maldera, C. Riccardi, F. Pedone, L. Moscardelli, M. Mantuano, A. Lupo, P.G. Pellegrino, R. Antinoro, S. Cantarella, G. Randazzo, G. Marino, M. Meconizzi, A. Maniscalco, C. Donatelli, F. Torsello; M. Drobisz, T. Gregorczyk, G. Wyrwicz, W. Dżugan, J. Ostrowski, W. Załuska, E. Bocheńska- Nowacka, A. Jaroszyński, J. Drabik, M. Birecka, J. Śliwarska- Strońska, T. Gauda, St. Dzimira, P. Rutkowski; J. Lopes, J.A. Lopes, M. Leal, M. Raimundol, J. Gabás, M. Pimato, P. Berti, L. Goro

peer review only



STROBE Statement—Checklist of items that should be included in reports of *cross-sectional studies*

|                              | Item No | Recommendation                                                                                                                                                                                    | Page reference    |
|------------------------------|---------|---------------------------------------------------------------------------------------------------------------------------------------------------------------------------------------------------|-------------------|
| <b>Title and abstract</b>    | 1       | (a) Indicate the study's design with a commonly used term in the title or the abstract                                                                                                            | 1                 |
|                              |         | (b) Provide in the abstract an informative and balanced summary of what was done and what was found                                                                                               | 2                 |
| <b>Introduction</b>          |         |                                                                                                                                                                                                   |                   |
| Background/rationale         | 2       | Explain the scientific background and rationale for the investigation being reported                                                                                                              | 4                 |
| Objectives                   | 3       | State specific objectives, including any prespecified hypotheses                                                                                                                                  | 5                 |
| <b>Methods</b>               |         |                                                                                                                                                                                                   |                   |
| Study design                 | 4       | Present key elements of study design early in the paper                                                                                                                                           | 5-7               |
| Setting                      | 5       | Describe the setting, locations, and relevant dates, including periods of recruitment, exposure, follow-up, and data collection                                                                   | 5-7               |
| Participants                 | 6       | (a) Give the eligibility criteria, and the sources and methods of selection of participants                                                                                                       | 5-6               |
| Variables                    | 7       | Clearly define all outcomes, exposures, predictors, potential confounders, and effect modifiers. Give diagnostic criteria, if applicable                                                          | 6-7               |
| Data sources/<br>measurement | 8*      | For each variable of interest, give sources of data and details of methods of assessment (measurement). Describe comparability of assessment methods if there is more than one group              | 6-7               |
| Bias                         | 9       | Describe any efforts to address potential sources of bias                                                                                                                                         | 7                 |
| Study size                   | 10      | Explain how the study size was arrived at                                                                                                                                                         | 5                 |
| Quantitative variables       | 11      | Explain how quantitative variables were handled in the analyses. If applicable, describe which groupings were chosen and why                                                                      | 6-7               |
| Statistical methods          | 12      | (a) Describe all statistical methods, including those used to control for confounding                                                                                                             | 7                 |
|                              |         | (b) Describe any methods used to examine subgroups and interactions                                                                                                                               | 7                 |
|                              |         | (c) Explain how missing data were addressed                                                                                                                                                       | Not done          |
|                              |         | (d) If applicable, describe analytical methods taking account of sampling strategy                                                                                                                | 5-6               |
|                              |         | (e) Describe any sensitivity analyses                                                                                                                                                             | None              |
| <b>Results</b>               |         |                                                                                                                                                                                                   |                   |
| Participants                 | 13*     | (a) Report numbers of individuals at each stage of study—eg numbers potentially eligible, examined for eligibility, confirmed eligible, included in the study, completing follow-up, and analysed | p 5, 8<br>Table 1 |
|                              |         | (b) Give reasons for non-participation at each stage                                                                                                                                              | 5, 8              |
|                              |         | (c) Consider use of a flow diagram                                                                                                                                                                | Table provided    |
| Descriptive data             | 14*     | (a) Give characteristics of study participants (eg demographic, clinical, social) and information on exposures and potential confounders                                                          | Table 1           |
|                              |         | (b) Indicate number of participants with missing data for each variable of interest                                                                                                               | eTable 1          |
| Outcome data                 | 15*     | Report numbers of outcome events or summary measures                                                                                                                                              | eTable 1          |



|                          | Item No | Recommendation                                                                                                                                                                                               | Page reference              |
|--------------------------|---------|--------------------------------------------------------------------------------------------------------------------------------------------------------------------------------------------------------------|-----------------------------|
| Main results             | 16      | (a) Give unadjusted estimates and, if applicable, confounder-adjusted estimates and their precision (eg, 95% confidence interval). Make clear which confounders were adjusted for and why they were included | Table 2, eTable 3, eTable 4 |
|                          |         | (b) Report category boundaries when continuous variables were categorized                                                                                                                                    | Throughout                  |
|                          |         | (c) If relevant, consider translating estimates of relative risk into absolute risk for a meaningful time period                                                                                             | Not applicable              |
| Other analyses           | 17      | Report other analyses done—eg analyses of subgroups and interactions, and sensitivity analyses                                                                                                               | Not done                    |
| <b>Discussion</b>        |         |                                                                                                                                                                                                              |                             |
| Key results              | 18      | Summarise key results with reference to study objectives                                                                                                                                                     | 10-11                       |
| Limitations              | 19      | Discuss limitations of the study, taking into account sources of potential bias or imprecision. Discuss both direction and magnitude of any potential bias                                                   | 13                          |
| Interpretation           | 20      | Give a cautious overall interpretation of results considering objectives, limitations, multiplicity of analyses, results from similar studies, and other relevant evidence                                   | 10-13                       |
| Generalisability         | 21      | Discuss the generalisability (external validity) of the study results                                                                                                                                        | 13                          |
| <b>Other information</b> |         |                                                                                                                                                                                                              |                             |
| Funding                  | 22      | Give the source of funding and the role of the funders for the present study and, if applicable, for the original study on which the present article is based                                                | 15                          |

\*Give information separately for exposed and unexposed groups.

**Note:** An Explanation and Elaboration article discusses each checklist item and gives methodological background and published examples of transparent reporting. The STROBE checklist is best used in conjunction with this article (freely available on the Web sites of PLoS Medicine at <http://www.plosmedicine.org/>, Annals of Internal Medicine at <http://www.annals.org/>, and Epidemiology at <http://www.epidem.com/>). Information on the STROBE Initiative is available at [www.strobe-statement.org](http://www.strobe-statement.org).
